# Supplementary material for: Comprehensive Characterization of m6A Regulators-Mediated Methylation Modification Patterns and Tumor Microenvironment Signature in Breast Cancer
Source: Research Square preprint supplement (doi:10.21203/rs.3.rs-332570/v1), 2021-03-30
Supplement: Supplementary file 1 [file 70da5bf8c61b6f7c0f9262c1.xlsx]

## Sheet: S4
Additional file 2. Clinical information and classification information of 2249 breast cancer samples.
sample	OS	censor	age	type	project	ER	PR	HER2	cluster	TNBC	age	status	gene.cluster	m6Ascore	m6Ascore group
TCGA-E9-A1NI-01A	300	0	51	Tumor	TCGA-BRCA	Positive	Positive	Negative	m6Acluster A	NO	<=53	Alive	Gene.cluster A	-13.2469	High m6Ascore
TCGA-A1-A0SP-01A	584	0	40	Tumor	TCGA-BRCA	Negative	Negative	Negative	m6Acluster B	YES	<=53	Alive	Gene.cluster B	-8.29561	High m6Ascore
TCGA-A8-A06X-01A	943	1	77	Tumor	TCGA-BRCA	Positive	Negative	Positive	m6Acluster C	NO	>53	Dead	Gene.cluster A	-9.3517	High m6Ascore
TCGA-E2-A14T-01A	2311	0	52	Tumor	TCGA-BRCA	Positive	Positive	Negative	m6Acluster B	NO	<=53	Alive	Gene.cluster A	-11.8485	High m6Ascore
TCGA-AC-A8OS-01A	70	0	71	Tumor	TCGA-BRCA	unknown	unknown	unknown	m6Acluster A	unknown	>53	Alive	Gene.cluster C	-16.961	Low m6Ascore
TCGA-A8-A09K-01A	912	0	68	Tumor	TCGA-BRCA	Positive	Positive	Negative	m6Acluster A	NO	>53	Alive	Gene.cluster A	-15.3558	Low m6Ascore
TCGA-OL-A5RY-01A	752	0	52	Tumor	TCGA-BRCA	unknown	unknown	unknown	m6Acluster C	unknown	<=53	Alive	Gene.cluster B	-11.1435	High m6Ascore
TCGA-BH-A0DG-01A	2041	0	30	Tumor	TCGA-BRCA	Positive	Negative	Negative	m6Acluster C	NO	<=53	Alive	Gene.cluster C	-13.2909	High m6Ascore
TCGA-B6-A0I9-01A	362	1	62	Tumor	TCGA-BRCA	unknown	Positive	Positive	m6Acluster B	NO	>53	Dead	Gene.cluster A	-11.2893	High m6Ascore
TCGA-A2-A0CP-01A	2813	0	60	Tumor	TCGA-BRCA	Positive	Positive	Negative	m6Acluster C	NO	>53	Alive	Gene.cluster C	-13.6507	Low m6Ascore
TCGA-A8-A07S-01A	243	0	73	Tumor	TCGA-BRCA	Positive	Negative	Negative	m6Acluster A	NO	>53	Alive	Gene.cluster A	-14.5798	Low m6Ascore
TCGA-AO-A12H-01A	1234	0	69	Tumor	TCGA-BRCA	Positive	Positive	Negative	m6Acluster C	NO	>53	Alive	Gene.cluster A	-21.5055	Low m6Ascore
TCGA-AR-A1AU-01A	2868	0	39	Tumor	TCGA-BRCA	Positive	Positive	Negative	m6Acluster C	NO	<=53	Alive	Gene.cluster A	-13.3072	High m6Ascore
TCGA-D8-A1X9-01A	727	0	66	Tumor	TCGA-BRCA	Positive	Positive	Negative	m6Acluster B	NO	>53	Alive	Gene.cluster A	-12.3728	High m6Ascore
TCGA-A8-A07R-01A	273	0	80	Tumor	TCGA-BRCA	Negative	Negative	unknown	m6Acluster B	unknown	>53	Alive	Gene.cluster B	-5.77596	High m6Ascore
TCGA-AO-A12C-01A	2372	0	42	Tumor	TCGA-BRCA	Positive	Positive	Positive	m6Acluster C	NO	<=53	Alive	Gene.cluster C	-15.649	Low m6Ascore
TCGA-V7-A7HQ-01A	2033	0	75	Tumor	TCGA-BRCA	unknown	unknown	unknown	m6Acluster A	unknown	>53	Alive	Gene.cluster C	-14.0837	Low m6Ascore
TCGA-A2-A1FZ-01A	683	0	63	Tumor	TCGA-BRCA	Positive	Positive	Negative	m6Acluster C	NO	>53	Alive	Gene.cluster C	-20.8045	Low m6Ascore
TCGA-AR-A251-01A	3030	0	51	Tumor	TCGA-BRCA	Positive	Negative	Negative	m6Acluster A	NO	<=53	Alive	Gene.cluster B	-8.32913	High m6Ascore
TCGA-EW-A1PF-01A	439	0	50	Tumor	TCGA-BRCA	Positive	Positive	Negative	m6Acluster C	NO	<=53	Alive	Gene.cluster C	-15.2781	Low m6Ascore
TCGA-BH-A18T-01A	224	1	70	Tumor	TCGA-BRCA	Negative	Negative	Negative	m6Acluster B	YES	>53	Dead	Gene.cluster B	-4.8321	High m6Ascore
TCGA-AR-A24S-01A	2976	0	61	Tumor	TCGA-BRCA	Positive	Positive	Negative	m6Acluster B	NO	>53	Alive	Gene.cluster A	-13.3438	Low m6Ascore
TCGA-AN-A041-01A	7	0	29	Tumor	TCGA-BRCA	Positive	Negative	unknown	m6Acluster B	NO	<=53	Alive	Gene.cluster A	-15.3605	Low m6Ascore
TCGA-E2-A1LL-01A	1309	0	73	Tumor	TCGA-BRCA	Negative	Negative	Negative	m6Acluster C	YES	>53	Alive	Gene.cluster B	-7.68498	High m6Ascore
TCGA-E2-A1IJ-01A	865	0	57	Tumor	TCGA-BRCA	Positive	Positive	Negative	m6Acluster C	NO	>53	Alive	Gene.cluster C	-14.7264	Low m6Ascore
TCGA-AR-A24O-01A	3607	0	43	Tumor	TCGA-BRCA	Positive	Positive	Negative	m6Acluster C	NO	<=53	Alive	Gene.cluster C	-16.0812	Low m6Ascore
TCGA-XX-A899-01A	467	0	46	Tumor	TCGA-BRCA	unknown	unknown	unknown	m6Acluster A	unknown	<=53	Alive	Gene.cluster C	-14.781	Low m6Ascore
TCGA-D8-A1XK-01A	441	0	55	Tumor	TCGA-BRCA	Negative	Negative	Negative	m6Acluster B	YES	>53	Alive	Gene.cluster B	-6.59543	High m6Ascore
TCGA-AC-A5XS-01A	588	0	74	Tumor	TCGA-BRCA	unknown	unknown	unknown	m6Acluster B	unknown	>53	Alive	Gene.cluster C	-14.8739	Low m6Ascore
TCGA-BH-A18L-01A	811	1	50	Tumor	TCGA-BRCA	Positive	Positive	unknown	m6Acluster B	NO	<=53	Dead	Gene.cluster A	-11.9136	High m6Ascore
TCGA-OL-A66J-01A	1996	0	80	Tumor	TCGA-BRCA	unknown	unknown	unknown	m6Acluster A	unknown	>53	Alive	Gene.cluster C	-15.3152	Low m6Ascore
TCGA-PE-A5DD-01A	1953	0	64	Tumor	TCGA-BRCA	unknown	unknown	unknown	m6Acluster A	unknown	>53	Alive	Gene.cluster A	-13.5264	Low m6Ascore
TCGA-AN-A04D-01A	52	0	58	Tumor	TCGA-BRCA	Negative	Negative	Negative	m6Acluster C	YES	>53	Alive	Gene.cluster B	-6.55758	High m6Ascore
TCGA-4H-AAAK-01A	348	0	50	Tumor	TCGA-BRCA	unknown	unknown	unknown	m6Acluster A	unknown	<=53	Alive	Gene.cluster A	-14.6642	Low m6Ascore
TCGA-E9-A5FL-01A	24	0	65	Tumor	TCGA-BRCA	unknown	unknown	unknown	m6Acluster A	unknown	>53	Alive	Gene.cluster B	-7.40225	High m6Ascore
TCGA-E9-A24A-01A	747	0	69	Tumor	TCGA-BRCA	unknown	unknown	Negative	m6Acluster B	unknown	>53	Alive	Gene.cluster C	-20.6052	Low m6Ascore
TCGA-BH-A1FM-01A	1388	1	44	Tumor	TCGA-BRCA	Positive	Negative	Negative	m6Acluster B	NO	<=53	Dead	Gene.cluster A	-14.4303	Low m6Ascore
TCGA-A8-A07C-01A	1034	0	57	Tumor	TCGA-BRCA	Negative	Negative	Negative	m6Acluster B	YES	>53	Alive	Gene.cluster B	-7.05386	High m6Ascore
TCGA-AR-A24Q-01A	3172	0	49	Tumor	TCGA-BRCA	Positive	Negative	Negative	m6Acluster B	NO	<=53	Alive	Gene.cluster B	-10.1003	High m6Ascore
TCGA-AR-A2LE-01A	5062	0	69	Tumor	TCGA-BRCA	unknown	unknown	unknown	m6Acluster B	unknown	>53	Alive	Gene.cluster A	-15.0706	Low m6Ascore
TCGA-AR-A0U4-01A	3261	0	54	Tumor	TCGA-BRCA	Negative	Negative	Negative	m6Acluster A	YES	>53	Alive	Gene.cluster B	-10.1616	High m6Ascore
TCGA-GM-A2DN-01A	3091	0	58	Tumor	TCGA-BRCA	Positive	Positive	unknown	m6Acluster B	NO	>53	Alive	Gene.cluster C	-14.5079	Low m6Ascore
TCGA-A7-A13D-01A	965	0	46	Tumor	TCGA-BRCA	Negative	Positive	Negative	m6Acluster B	NO	<=53	Alive	Gene.cluster B	-6.47244	High m6Ascore
TCGA-D8-A1JG-01B	1612	0	62	Tumor	TCGA-BRCA	Negative	Negative	Negative	m6Acluster B	YES	>53	Alive	Gene.cluster B	-9.98575	High m6Ascore
TCGA-E2-A570-01A	931	0	47	Tumor	TCGA-BRCA	unknown	unknown	unknown	m6Acluster A	unknown	<=53	Alive	Gene.cluster A	-14.1794	Low m6Ascore
TCGA-A2-A04Q-01A	2385	0	48	Tumor	TCGA-BRCA	Negative	Negative	Negative	m6Acluster C	YES	<=53	Alive	Gene.cluster B	-9.78906	High m6Ascore
TCGA-A7-A6VV-01A	313	0	51	Tumor	TCGA-BRCA	unknown	unknown	unknown	m6Acluster B	unknown	<=53	Alive	Gene.cluster B	-7.4754	High m6Ascore
TCGA-E2-A1IG-01A	2140	0	45	Tumor	TCGA-BRCA	Positive	Positive	unknown	m6Acluster B	NO	<=53	Alive	Gene.cluster A	-14.0675	Low m6Ascore
TCGA-E9-A1N6-01A	678	1	52	Tumor	TCGA-BRCA	Positive	Positive	Positive	m6Acluster B	NO	<=53	Dead	Gene.cluster A	-15.9615	Low m6Ascore
TCGA-E9-A1NC-01A	1203	0	61	Tumor	TCGA-BRCA	Negative	Positive	Negative	m6Acluster B	NO	>53	Alive	Gene.cluster B	-7.80127	High m6Ascore
TCGA-A7-A3IZ-01A	322	0	62	Tumor	TCGA-BRCA	unknown	unknown	unknown	m6Acluster A	unknown	>53	Alive	Gene.cluster A	-16.0808	Low m6Ascore
TCGA-AN-A0AK-01A	224	0	76	Tumor	TCGA-BRCA	Positive	Negative	Negative	m6Acluster A	NO	>53	Alive	Gene.cluster A	-12.1013	High m6Ascore
TCGA-D8-A1JM-01A	590	0	59	Tumor	TCGA-BRCA	Positive	Negative	Negative	m6Acluster B	NO	>53	Alive	Gene.cluster B	-6.07127	High m6Ascore
TCGA-OL-A5S0-01A	620	0	66	Tumor	TCGA-BRCA	unknown	unknown	unknown	m6Acluster B	unknown	>53	Alive	Gene.cluster B	-7.40615	High m6Ascore
TCGA-A8-A06Z-01A	31	0	84	Tumor	TCGA-BRCA	Positive	Positive	Negative	m6Acluster A	NO	>53	Alive	Gene.cluster A	-15.0887	Low m6Ascore
TCGA-AQ-A54O-01A	1001	0	51	Tumor	TCGA-BRCA	unknown	unknown	unknown	m6Acluster B	unknown	<=53	Alive	Gene.cluster A	-13.8911	Low m6Ascore
TCGA-E2-A15S-01A	428	0	34	Tumor	TCGA-BRCA	Positive	Negative	Negative	m6Acluster B	NO	<=53	Alive	Gene.cluster A	-12.4327	High m6Ascore
TCGA-EW-A423-01A	533	0	75	Tumor	TCGA-BRCA	unknown	unknown	unknown	m6Acluster A	unknown	>53	Alive	Gene.cluster A	-16.0804	Low m6Ascore
TCGA-C8-A273-01A	513	0	29	Tumor	TCGA-BRCA	Positive	Positive	Negative	m6Acluster B	NO	<=53	Alive	Gene.cluster A	-14.3876	Low m6Ascore
TCGA-OL-A5RV-01A	1062	0	43	Tumor	TCGA-BRCA	unknown	unknown	unknown	m6Acluster A	unknown	<=53	Alive	Gene.cluster C	-16.0026	Low m6Ascore
TCGA-AC-A2FM-01A	792	1	87	Tumor	TCGA-BRCA	unknown	unknown	unknown	m6Acluster A	unknown	>53	Dead	Gene.cluster A	-15.9168	Low m6Ascore
TCGA-AO-A0JM-01A	2184	0	40	Tumor	TCGA-BRCA	Positive	Positive	Positive	m6Acluster C	NO	<=53	Alive	Gene.cluster A	-17.4429	Low m6Ascore
TCGA-BH-A0DP-01A	476	0	60	Tumor	TCGA-BRCA	Positive	Positive	Negative	m6Acluster B	NO	>53	Alive	Gene.cluster C	-15.8954	Low m6Ascore
TCGA-A2-A25E-01A	3204	0	34	Tumor	TCGA-BRCA	Positive	Positive	unknown	m6Acluster B	NO	<=53	Alive	Gene.cluster A	-14.2017	Low m6Ascore
TCGA-B6-A2IU-01A	5176	0	62	Tumor	TCGA-BRCA	unknown	unknown	unknown	m6Acluster A	unknown	>53	Alive	Gene.cluster A	-16.295	Low m6Ascore
TCGA-BH-A18P-01A	921	1	60	Tumor	TCGA-BRCA	Positive	Negative	Negative	m6Acluster B	NO	>53	Dead	Gene.cluster A	-12.5818	High m6Ascore
TCGA-E9-A22B-01A	1167	0	71	Tumor	TCGA-BRCA	Positive	Negative	Negative	m6Acluster B	NO	>53	Alive	Gene.cluster A	-13.6822	Low m6Ascore
TCGA-A2-A0SW-01A	1365	1	82	Tumor	TCGA-BRCA	Positive	Negative	Negative	m6Acluster B	NO	>53	Dead	Gene.cluster A	-9.85999	High m6Ascore
TCGA-E2-A107-01A	1047	0	54	Tumor	TCGA-BRCA	Positive	Negative	Negative	m6Acluster A	NO	>53	Alive	Gene.cluster A	-12.8665	High m6Ascore
TCGA-E2-A1B6-01A	867	0	44	Tumor	TCGA-BRCA	Negative	Negative	Negative	m6Acluster B	YES	<=53	Alive	Gene.cluster B	-9.34533	High m6Ascore
TCGA-D8-A1XW-01A	1309	0	53	Tumor	TCGA-BRCA	Negative	Positive	Negative	m6Acluster B	NO	<=53	Alive	Gene.cluster B	-9.22817	High m6Ascore
TCGA-A7-A0DC-01A	906	0	63	Tumor	TCGA-BRCA	Positive	Negative	Negative	m6Acluster B	NO	>53	Alive	Gene.cluster A	-14.0787	Low m6Ascore
TCGA-EW-A6SD-01A	1010	0	32	Tumor	TCGA-BRCA	unknown	unknown	unknown	m6Acluster B	unknown	<=53	Alive	Gene.cluster B	-8.41888	High m6Ascore
TCGA-AO-A0J3-01A	651	0	67	Tumor	TCGA-BRCA	Positive	Positive	Negative	m6Acluster A	NO	>53	Alive	Gene.cluster A	-12.8782	High m6Ascore
TCGA-AN-A03X-01A	10	0	74	Tumor	TCGA-BRCA	Positive	Positive	Negative	m6Acluster B	NO	>53	Alive	Gene.cluster C	-13.108	High m6Ascore
TCGA-A8-A099-01A	304	0	76	Tumor	TCGA-BRCA	Positive	Positive	Positive	m6Acluster C	NO	>53	Alive	Gene.cluster C	-14.773	Low m6Ascore
TCGA-E2-A14Z-01A	563	1	64	Tumor	TCGA-BRCA	Positive	Positive	Negative	m6Acluster C	NO	>53	Dead	Gene.cluster A	-10.8334	High m6Ascore
TCGA-AR-A5QP-01A	1185	0	54	Tumor	TCGA-BRCA	unknown	unknown	unknown	m6Acluster A	unknown	>53	Alive	Gene.cluster C	-14.1826	Low m6Ascore
TCGA-AC-A62X-01A	417	0	72	Tumor	TCGA-BRCA	unknown	unknown	unknown	m6Acluster C	unknown	>53	Alive	Gene.cluster B	-7.46121	High m6Ascore
TCGA-BH-A42V-01A	635	0	41	Tumor	TCGA-BRCA	unknown	unknown	unknown	m6Acluster A	unknown	<=53	Alive	Gene.cluster C	-15.2187	Low m6Ascore
TCGA-B6-A0RS-01A	3063	1	38	Tumor	TCGA-BRCA	Negative	Negative	Negative	m6Acluster A	YES	<=53	Dead	Gene.cluster B	-9.47684	High m6Ascore
TCGA-D8-A1JL-01A	611	0	72	Tumor	TCGA-BRCA	Negative	Negative	Negative	m6Acluster B	YES	>53	Alive	Gene.cluster B	-8.79191	High m6Ascore
TCGA-BH-A0DZ-01A	495	0	43	Tumor	TCGA-BRCA	Positive	Positive	Positive	m6Acluster B	NO	<=53	Alive	Gene.cluster A	-12.5647	High m6Ascore
TCGA-A8-A06Y-01A	791	0	66	Tumor	TCGA-BRCA	Positive	Positive	Negative	m6Acluster C	NO	>53	Alive	Gene.cluster A	-12.7845	High m6Ascore
TCGA-B6-A1KC-01B	1326	0	67	Tumor	TCGA-BRCA	Positive	Negative	unknown	m6Acluster B	NO	>53	Alive	Gene.cluster A	-15.9298	Low m6Ascore
TCGA-C8-A135-01A	393	0	64	Tumor	TCGA-BRCA	Negative	Negative	Positive	m6Acluster A	NO	>53	Alive	Gene.cluster B	-8.7759	High m6Ascore
TCGA-5L-AAT1-01A	1471	0	63	Tumor	TCGA-BRCA	unknown	unknown	unknown	m6Acluster A	unknown	>53	Alive	Gene.cluster C	-14.3732	Low m6Ascore
TCGA-AR-A24R-01A	3430	0	45	Tumor	TCGA-BRCA	Positive	Positive	Negative	m6Acluster B	NO	<=53	Alive	Gene.cluster A	-15.059	Low m6Ascore
TCGA-S3-AA0Z-01A	629	0	63	Tumor	TCGA-BRCA	unknown	unknown	unknown	m6Acluster B	unknown	>53	Alive	Gene.cluster B	-7.01538	High m6Ascore
TCGA-D8-A1J8-01A	431	0	77	Tumor	TCGA-BRCA	Positive	Positive	Negative	m6Acluster B	NO	>53	Alive	Gene.cluster A	-15.7265	Low m6Ascore
TCGA-A2-A0ER-01A	2263	0	63	Tumor	TCGA-BRCA	Positive	Positive	Negative	m6Acluster C	NO	>53	Alive	Gene.cluster A	-17.0517	Low m6Ascore
TCGA-E9-A1ND-01A	1266	0	75	Tumor	TCGA-BRCA	Negative	Negative	Negative	m6Acluster B	YES	>53	Alive	Gene.cluster B	-6.58483	High m6Ascore
TCGA-A2-A1G1-01A	584	0	85	Tumor	TCGA-BRCA	Negative	Negative	Positive	m6Acluster B	NO	>53	Alive	Gene.cluster B	-7.9152	High m6Ascore
TCGA-A2-A0SU-01A	1662	0	66	Tumor	TCGA-BRCA	Positive	Positive	Negative	m6Acluster C	NO	>53	Alive	Gene.cluster A	-15.8619	Low m6Ascore
TCGA-E2-A1LB-01A	2306	0	41	Tumor	TCGA-BRCA	Negative	Negative	Positive	m6Acluster C	NO	<=53	Alive	Gene.cluster C	-11.0366	High m6Ascore
TCGA-E9-A1RD-01A	34	0	67	Tumor	TCGA-BRCA	unknown	unknown	Negative	m6Acluster C	unknown	>53	Alive	Gene.cluster A	-21.0654	Low m6Ascore
TCGA-OL-A6VQ-01A	600	0	49	Tumor	TCGA-BRCA	unknown	unknown	unknown	m6Acluster C	unknown	<=53	Alive	Gene.cluster C	-16.3835	Low m6Ascore
TCGA-AQ-A04J-01A	819	0	45	Tumor	TCGA-BRCA	Negative	Negative	Negative	m6Acluster B	YES	<=53	Alive	Gene.cluster B	-9.43549	High m6Ascore
TCGA-AQ-A1H3-01A	989	0	49	Tumor	TCGA-BRCA	Positive	Positive	Negative	m6Acluster B	NO	<=53	Alive	Gene.cluster A	-15.3603	Low m6Ascore
TCGA-A2-A259-01A	1596	0	70	Tumor	TCGA-BRCA	Positive	Positive	Negative	m6Acluster C	NO	>53	Alive	Gene.cluster C	-15.2927	Low m6Ascore
TCGA-WT-AB44-01A	883	0	77	Tumor	TCGA-BRCA	unknown	unknown	unknown	m6Acluster A	unknown	>53	Alive	Gene.cluster C	-10.5093	High m6Ascore
TCGA-B6-A0IN-01A	2573	1	45	Tumor	TCGA-BRCA	Positive	Negative	unknown	m6Acluster C	NO	<=53	Dead	Gene.cluster A	-15.3112	Low m6Ascore
TCGA-E9-A1R3-01A	78	0	70	Tumor	TCGA-BRCA	unknown	unknown	Negative	m6Acluster C	unknown	>53	Alive	Gene.cluster C	-18.3644	Low m6Ascore
TCGA-A8-A086-01A	396	0	59	Tumor	TCGA-BRCA	Positive	Positive	Negative	m6Acluster A	NO	>53	Alive	Gene.cluster A	-15.1388	Low m6Ascore
TCGA-AC-A3BB-01A	987	0	46	Tumor	TCGA-BRCA	unknown	unknown	unknown	m6Acluster C	unknown	<=53	Alive	Gene.cluster C	-14.7255	Low m6Ascore
TCGA-AC-A2QI-01A	588	0	76	Tumor	TCGA-BRCA	unknown	unknown	unknown	m6Acluster B	unknown	>53	Alive	Gene.cluster C	-15.7834	Low m6Ascore
TCGA-BH-A1F5-01A	2712	1	62	Tumor	TCGA-BRCA	Positive	Positive	unknown	m6Acluster B	NO	>53	Dead	Gene.cluster A	-15.4262	Low m6Ascore
TCGA-AC-A3HN-01A	496	0	87	Tumor	TCGA-BRCA	unknown	unknown	unknown	m6Acluster A	unknown	>53	Alive	Gene.cluster C	-15.9509	Low m6Ascore
TCGA-BH-A1FG-01A	577	1	88	Tumor	TCGA-BRCA	Positive	Positive	unknown	m6Acluster B	NO	>53	Dead	Gene.cluster A	-19.2153	Low m6Ascore
TCGA-BH-A0DV-01A	2064	0	54	Tumor	TCGA-BRCA	Positive	Positive	Negative	m6Acluster C	NO	>53	Alive	Gene.cluster C	-17.1394	Low m6Ascore
TCGA-UL-AAZ6-01A	518	0	73	Tumor	TCGA-BRCA	unknown	unknown	unknown	m6Acluster B	unknown	>53	Alive	Gene.cluster A	-6.98403	High m6Ascore
TCGA-AR-A255-01A	2161	0	62	Tumor	TCGA-BRCA	Positive	Positive	Positive	m6Acluster C	NO	>53	Alive	Gene.cluster A	-14.8427	Low m6Ascore
TCGA-LD-A7W6-01A	404	0	54	Tumor	TCGA-BRCA	unknown	unknown	unknown	m6Acluster A	unknown	>53	Alive	Gene.cluster C	-15.8521	Low m6Ascore
TCGA-AR-A24Z-01A	3001	0	57	Tumor	TCGA-BRCA	Positive	Positive	Negative	m6Acluster B	NO	>53	Alive	Gene.cluster A	-14.9019	Low m6Ascore
TCGA-A1-A0SO-01A	852	0	67	Tumor	TCGA-BRCA	Negative	Negative	Negative	m6Acluster B	YES	>53	Alive	Gene.cluster B	-6.82122	High m6Ascore
TCGA-A2-A3XS-01A	1032	1	62	Tumor	TCGA-BRCA	unknown	unknown	unknown	m6Acluster B	unknown	>53	Dead	Gene.cluster B	-7.54997	High m6Ascore
TCGA-D8-A1X6-01A	541	0	80	Tumor	TCGA-BRCA	Positive	Positive	Negative	m6Acluster A	NO	>53	Alive	Gene.cluster A	-14.6576	Low m6Ascore
TCGA-BH-A0HF-01A	727	0	77	Tumor	TCGA-BRCA	Positive	Positive	Negative	m6Acluster C	NO	>53	Alive	Gene.cluster C	-18.4881	Low m6Ascore
TCGA-A7-A3J0-01A	313	0	62	Tumor	TCGA-BRCA	unknown	unknown	unknown	m6Acluster C	unknown	>53	Alive	Gene.cluster A	-16.3133	Low m6Ascore
TCGA-AC-A23C-01A	585	0	62	Tumor	TCGA-BRCA	Positive	Positive	Positive	m6Acluster B	NO	>53	Alive	Gene.cluster A	-16.3189	Low m6Ascore
TCGA-LL-A442-01A	889	0	56	Tumor	TCGA-BRCA	unknown	unknown	unknown	m6Acluster C	unknown	>53	Alive	Gene.cluster A	-16.2054	Low m6Ascore
TCGA-S3-A6ZH-01A	641	0	29	Tumor	TCGA-BRCA	unknown	unknown	unknown	m6Acluster C	unknown	<=53	Alive	Gene.cluster A	-8.88964	High m6Ascore
TCGA-AC-A8OR-01A	40	0	75	Tumor	TCGA-BRCA	unknown	unknown	unknown	m6Acluster A	unknown	>53	Alive	Gene.cluster A	-12.292	High m6Ascore
TCGA-AR-A1AX-01A	2629	0	64	Tumor	TCGA-BRCA	Positive	Positive	Positive	m6Acluster B	NO	>53	Alive	Gene.cluster A	-13.5857	Low m6Ascore
TCGA-D8-A1XO-01A	1682	0	56	Tumor	TCGA-BRCA	Positive	Positive	Negative	m6Acluster B	NO	>53	Alive	Gene.cluster C	-16.1831	Low m6Ascore
TCGA-E9-A1R2-01A	1063	0	51	Tumor	TCGA-BRCA	Positive	Negative	Negative	m6Acluster C	NO	<=53	Alive	Gene.cluster A	-14.547	Low m6Ascore
TCGA-D8-A27M-01A	410	0	59	Tumor	TCGA-BRCA	Negative	Negative	Negative	m6Acluster B	YES	>53	Alive	Gene.cluster B	-10.5486	High m6Ascore
TCGA-AN-A0FY-01A	10	0	55	Tumor	TCGA-BRCA	Positive	Positive	Negative	m6Acluster A	NO	>53	Alive	Gene.cluster A	-11.6883	High m6Ascore
TCGA-BH-A0DX-01A	2156	0	62	Tumor	TCGA-BRCA	Positive	Positive	Negative	m6Acluster C	NO	>53	Alive	Gene.cluster C	-15.0335	Low m6Ascore
TCGA-EW-A1IY-01A	258	0	38	Tumor	TCGA-BRCA	Positive	Positive	Negative	m6Acluster C	NO	<=53	Alive	Gene.cluster A	-16.4999	Low m6Ascore
TCGA-A2-A04N-01A	4354	0	66	Tumor	TCGA-BRCA	Positive	Positive	Negative	m6Acluster A	NO	>53	Alive	Gene.cluster A	-14.9126	Low m6Ascore
TCGA-A2-A0YF-01A	1535	0	67	Tumor	TCGA-BRCA	Positive	Negative	Negative	m6Acluster B	NO	>53	Alive	Gene.cluster A	-16.7686	Low m6Ascore
TCGA-PE-A5DE-01A	2645	0	41	Tumor	TCGA-BRCA	unknown	unknown	unknown	m6Acluster B	unknown	<=53	Alive	Gene.cluster A	-16.9351	Low m6Ascore
TCGA-EW-A1J5-01A	477	0	59	Tumor	TCGA-BRCA	Positive	Positive	Negative	m6Acluster B	NO	>53	Alive	Gene.cluster A	-15.0501	Low m6Ascore
TCGA-AO-A0JE-01A	2335	0	53	Tumor	TCGA-BRCA	Negative	Negative	Positive	m6Acluster C	NO	<=53	Alive	Gene.cluster A	-11.9362	High m6Ascore
TCGA-BH-A1FN-01A	2192	1	34	Tumor	TCGA-BRCA	Positive	Positive	Negative	m6Acluster C	NO	<=53	Dead	Gene.cluster B	-9.03311	High m6Ascore
TCGA-BH-A18V-01A	1556	1	48	Tumor	TCGA-BRCA	Negative	Negative	Negative	m6Acluster B	YES	<=53	Dead	Gene.cluster B	-6.72488	High m6Ascore
TCGA-BH-A0BF-01A	1324	1	56	Tumor	TCGA-BRCA	Positive	Positive	Negative	m6Acluster B	NO	>53	Dead	Gene.cluster A	-11.1484	High m6Ascore
TCGA-B6-A409-01A	573	1	44	Tumor	TCGA-BRCA	unknown	unknown	unknown	m6Acluster B	unknown	<=53	Dead	Gene.cluster B	-6.96053	High m6Ascore
TCGA-A2-A0CL-01A	3015	0	37	Tumor	TCGA-BRCA	Positive	Positive	Negative	m6Acluster C	NO	<=53	Alive	Gene.cluster A	-11.3641	High m6Ascore
TCGA-A2-A0CO-01A	1468	1	85	Tumor	TCGA-BRCA	unknown	unknown	unknown	m6Acluster C	unknown	>53	Dead	Gene.cluster C	-15.1443	Low m6Ascore
TCGA-AC-A3QP-01A	675	0	79	Tumor	TCGA-BRCA	unknown	unknown	unknown	m6Acluster A	unknown	>53	Alive	Gene.cluster C	-13.7374	Low m6Ascore
TCGA-AC-A2QJ-01A	446	1	48	Tumor	TCGA-BRCA	unknown	unknown	unknown	m6Acluster C	unknown	<=53	Dead	Gene.cluster B	-9.14216	High m6Ascore
TCGA-B6-A0RM-01A	2373	1	57	Tumor	TCGA-BRCA	Positive	Positive	Negative	m6Acluster C	NO	>53	Dead	Gene.cluster A	-14.1812	Low m6Ascore
TCGA-D8-A1JS-01A	371	0	77	Tumor	TCGA-BRCA	Positive	Positive	Negative	m6Acluster C	NO	>53	Alive	Gene.cluster C	-12.085	High m6Ascore
TCGA-A7-A26J-01A	627	0	49	Tumor	TCGA-BRCA	Positive	Positive	Negative	m6Acluster B	NO	<=53	Alive	Gene.cluster A	-13.9863	Low m6Ascore
TCGA-A7-A13H-01A	899	0	61	Tumor	TCGA-BRCA	unknown	unknown	unknown	m6Acluster A	unknown	>53	Alive	Gene.cluster C	-16.287	Low m6Ascore
TCGA-AO-A126-01A	3307	0	39	Tumor	TCGA-BRCA	Positive	Positive	Negative	m6Acluster A	NO	<=53	Alive	Gene.cluster A	-14.3255	Low m6Ascore
TCGA-BH-A6R8-01A	293	0	46	Tumor	TCGA-BRCA	unknown	unknown	unknown	m6Acluster A	unknown	<=53	Alive	Gene.cluster A	-15.1247	Low m6Ascore
TCGA-A7-A0DB-01C	1007	0	56	Tumor	TCGA-BRCA	Positive	Positive	Negative	m6Acluster B	NO	>53	Alive	Gene.cluster A	-15.7523	Low m6Ascore
TCGA-AC-A3TM-01A	762	0	50	Tumor	TCGA-BRCA	unknown	unknown	unknown	m6Acluster C	unknown	<=53	Alive	Gene.cluster A	-13.3836	Low m6Ascore
TCGA-AR-A0TQ-01A	2991	0	27	Tumor	TCGA-BRCA	Positive	Negative	Positive	m6Acluster B	NO	<=53	Alive	Gene.cluster A	-13.3634	Low m6Ascore
TCGA-GM-A2DH-01A	2193	0	58	Tumor	TCGA-BRCA	Negative	Negative	unknown	m6Acluster B	unknown	>53	Alive	Gene.cluster B	-10.1777	High m6Ascore
TCGA-B6-A0RI-01A	7126	0	44	Tumor	TCGA-BRCA	Positive	Positive	Negative	m6Acluster A	NO	<=53	Alive	Gene.cluster A	-16.192	Low m6Ascore
TCGA-A2-A1G0-01A	616	0	49	Tumor	TCGA-BRCA	Positive	Positive	Negative	m6Acluster C	NO	<=53	Alive	Gene.cluster C	-17.8075	Low m6Ascore
TCGA-A2-A1FX-01A	1847	0	61	Tumor	TCGA-BRCA	Positive	Positive	Negative	m6Acluster C	NO	>53	Alive	Gene.cluster A	-14.3977	Low m6Ascore
TCGA-A7-A26G-01A	722	0	50	Tumor	TCGA-BRCA	Negative	Negative	Negative	m6Acluster B	YES	<=53	Alive	Gene.cluster B	-12.5527	High m6Ascore
TCGA-E2-A1LI-01A	3121	0	57	Tumor	TCGA-BRCA	Negative	Negative	Negative	m6Acluster B	YES	>53	Alive	Gene.cluster B	-6.75867	High m6Ascore
TCGA-A8-A08P-01A	943	0	70	Tumor	TCGA-BRCA	Positive	Positive	Positive	m6Acluster A	NO	>53	Alive	Gene.cluster B	-12.0829	High m6Ascore
TCGA-E2-A1IN-01A	675	0	60	Tumor	TCGA-BRCA	Positive	Positive	Negative	m6Acluster C	NO	>53	Alive	Gene.cluster A	-16.2767	Low m6Ascore
TCGA-BH-A0HA-01A	1611	0	31	Tumor	TCGA-BRCA	Positive	Positive	Negative	m6Acluster C	NO	<=53	Alive	Gene.cluster A	-17.612	Low m6Ascore
TCGA-AO-A1KR-01A	2513	0	51	Tumor	TCGA-BRCA	Negative	Negative	unknown	m6Acluster A	unknown	<=53	Alive	Gene.cluster B	-4.34977	High m6Ascore
TCGA-3C-AALK-01A	1448	0	52	Tumor	TCGA-BRCA	unknown	unknown	unknown	m6Acluster A	unknown	<=53	Alive	Gene.cluster C	-15.8675	Low m6Ascore
TCGA-BH-A0BV-01A	1519	0	78	Tumor	TCGA-BRCA	Positive	Positive	Negative	m6Acluster B	NO	>53	Alive	Gene.cluster A	-19.1421	Low m6Ascore
TCGA-E2-A1IH-01A	1026	0	80	Tumor	TCGA-BRCA	Positive	Positive	Negative	m6Acluster C	NO	>53	Alive	Gene.cluster A	-13.9287	Low m6Ascore
TCGA-XX-A89A-01A	488	0	68	Tumor	TCGA-BRCA	unknown	unknown	unknown	m6Acluster C	unknown	>53	Alive	Gene.cluster C	-14.0002	Low m6Ascore
TCGA-E9-A1RH-01A	1417	0	63	Tumor	TCGA-BRCA	unknown	unknown	Negative	m6Acluster C	unknown	>53	Alive	Gene.cluster B	-9.24573	High m6Ascore
TCGA-A8-A085-01A	1124	0	44	Tumor	TCGA-BRCA	Positive	Positive	Negative	m6Acluster C	NO	<=53	Alive	Gene.cluster A	-12.1394	High m6Ascore
TCGA-E9-A1N3-01A	1059	0	70	Tumor	TCGA-BRCA	unknown	unknown	Negative	m6Acluster C	unknown	>53	Alive	Gene.cluster A	-21.0263	Low m6Ascore
TCGA-D8-A13Y-01A	1728	0	52	Tumor	TCGA-BRCA	Positive	Positive	Negative	m6Acluster B	NO	<=53	Alive	Gene.cluster A	-10.7763	High m6Ascore
TCGA-AO-A0JB-01A	1542	0	50	Tumor	TCGA-BRCA	Positive	Positive	Negative	m6Acluster C	NO	<=53	Alive	Gene.cluster C	-7.08086	High m6Ascore
TCGA-AC-A6IV-01A	568	0	47	Tumor	TCGA-BRCA	unknown	unknown	unknown	m6Acluster B	unknown	<=53	Alive	Gene.cluster C	-14.664	Low m6Ascore
TCGA-A8-A09M-01A	1006	0	75	Tumor	TCGA-BRCA	Positive	Positive	Negative	m6Acluster B	NO	>53	Alive	Gene.cluster A	-13.5994	Low m6Ascore
TCGA-BH-A0GY-01A	923	0	67	Tumor	TCGA-BRCA	Positive	Positive	Negative	m6Acluster B	NO	>53	Alive	Gene.cluster A	-13.5472	Low m6Ascore
TCGA-AR-A2LL-01A	2012	0	70	Tumor	TCGA-BRCA	unknown	unknown	unknown	m6Acluster B	unknown	>53	Alive	Gene.cluster A	-13.0271	High m6Ascore
TCGA-BH-A208-01A	1759	1	48	Tumor	TCGA-BRCA	unknown	unknown	unknown	m6Acluster C	unknown	<=53	Dead	Gene.cluster C	-11.9898	High m6Ascore
TCGA-EW-A1PE-01A	320	0	56	Tumor	TCGA-BRCA	Positive	Positive	Negative	m6Acluster C	NO	>53	Alive	Gene.cluster C	-19.3215	Low m6Ascore
TCGA-AO-A125-01A	3456	0	72	Tumor	TCGA-BRCA	Positive	Positive	Negative	m6Acluster A	NO	>53	Alive	Gene.cluster A	-13.7446	Low m6Ascore
TCGA-E2-A1B1-01A	2653	0	45	Tumor	TCGA-BRCA	Positive	Positive	Positive	m6Acluster B	NO	<=53	Alive	Gene.cluster C	-15.2493	Low m6Ascore
TCGA-BH-A0C0-01A	1270	0	62	Tumor	TCGA-BRCA	Positive	Positive	Positive	m6Acluster A	NO	>53	Alive	Gene.cluster B	-10.0398	High m6Ascore
TCGA-A7-A26I-01B	661	0	65	Tumor	TCGA-BRCA	Negative	Negative	Negative	m6Acluster B	YES	>53	Alive	Gene.cluster B	-7.62172	High m6Ascore
TCGA-AO-A0JJ-01A	1887	0	54	Tumor	TCGA-BRCA	Positive	Positive	Negative	m6Acluster C	NO	>53	Alive	Gene.cluster C	-16.6406	Low m6Ascore
TCGA-AR-A2LH-01A	616	1	55	Tumor	TCGA-BRCA	unknown	unknown	unknown	m6Acluster B	unknown	>53	Dead	Gene.cluster C	-13.6754	Low m6Ascore
TCGA-A2-A3XW-01A	1712	0	42	Tumor	TCGA-BRCA	unknown	unknown	unknown	m6Acluster C	unknown	<=53	Alive	Gene.cluster C	-11.6209	High m6Ascore
TCGA-AR-A0TS-01A	2558	0	46	Tumor	TCGA-BRCA	Negative	Negative	Negative	m6Acluster B	YES	<=53	Alive	Gene.cluster B	-9.6969	High m6Ascore
TCGA-BH-A0AV-01A	1820	0	52	Tumor	TCGA-BRCA	Negative	Negative	Negative	m6Acluster B	YES	<=53	Alive	Gene.cluster B	-9.2537	High m6Ascore
TCGA-A8-A07B-01A	1308	0	69	Tumor	TCGA-BRCA	Positive	Positive	Positive	m6Acluster A	NO	>53	Alive	Gene.cluster A	-10.9523	High m6Ascore
TCGA-LL-A73Z-01A	227	1	55	Tumor	TCGA-BRCA	unknown	unknown	unknown	m6Acluster A	unknown	>53	Dead	Gene.cluster C	-11.9457	High m6Ascore
TCGA-B6-A402-01A	2281	0	47	Tumor	TCGA-BRCA	unknown	unknown	unknown	m6Acluster A	unknown	<=53	Alive	Gene.cluster B	-5.7043	High m6Ascore
TCGA-AR-A0TT-01A	3316	0	53	Tumor	TCGA-BRCA	Positive	Negative	Negative	m6Acluster C	NO	<=53	Alive	Gene.cluster A	-10.2469	High m6Ascore
TCGA-EW-A6SB-01A	760	0	62	Tumor	TCGA-BRCA	unknown	unknown	unknown	m6Acluster B	unknown	>53	Alive	Gene.cluster B	-5.89275	High m6Ascore
TCGA-AC-A2FB-01A	1234	0	65	Tumor	TCGA-BRCA	unknown	unknown	unknown	m6Acluster C	unknown	>53	Alive	Gene.cluster C	-15.0791	Low m6Ascore
TCGA-AC-A62V-01A	348	1	58	Tumor	TCGA-BRCA	unknown	unknown	unknown	m6Acluster A	unknown	>53	Dead	Gene.cluster A	-10.812	High m6Ascore
TCGA-D8-A1XQ-01A	499	0	69	Tumor	TCGA-BRCA	Negative	Negative	Negative	m6Acluster B	YES	>53	Alive	Gene.cluster B	-7.8586	High m6Ascore
TCGA-BH-A0DD-01A	2486	0	58	Tumor	TCGA-BRCA	Positive	Positive	Positive	m6Acluster B	NO	>53	Alive	Gene.cluster A	-13.1115	High m6Ascore
TCGA-Z7-A8R6-01A	3256	0	46	Tumor	TCGA-BRCA	unknown	unknown	unknown	m6Acluster A	unknown	<=53	Alive	Gene.cluster A	-12.0186	High m6Ascore
TCGA-OL-A5DA-01A	1783	0	61	Tumor	TCGA-BRCA	unknown	unknown	unknown	m6Acluster A	unknown	>53	Alive	Gene.cluster A	-15.7792	Low m6Ascore
TCGA-WT-AB41-01A	1611	0	55	Tumor	TCGA-BRCA	unknown	unknown	unknown	m6Acluster C	unknown	>53	Alive	Gene.cluster A	-12.6657	High m6Ascore
TCGA-E2-A1LA-01A	748	0	59	Tumor	TCGA-BRCA	Positive	Positive	Negative	m6Acluster B	NO	>53	Alive	Gene.cluster A	-14.1496	Low m6Ascore
TCGA-AR-A24N-01A	3035	0	54	Tumor	TCGA-BRCA	Positive	Positive	Negative	m6Acluster C	NO	>53	Alive	Gene.cluster A	-14.6365	Low m6Ascore
TCGA-E9-A3QA-01A	918	0	33	Tumor	TCGA-BRCA	unknown	unknown	unknown	m6Acluster B	unknown	<=53	Alive	Gene.cluster B	-7.26634	High m6Ascore
TCGA-E2-A15J-01A	1640	0	51	Tumor	TCGA-BRCA	Positive	Positive	Negative	m6Acluster A	NO	<=53	Alive	Gene.cluster A	-11.9078	High m6Ascore
TCGA-LL-A73Y-01A	477	0	67	Tumor	TCGA-BRCA	unknown	unknown	unknown	m6Acluster B	unknown	>53	Alive	Gene.cluster B	-11.6299	High m6Ascore
TCGA-A2-A4RY-01A	648	0	46	Tumor	TCGA-BRCA	unknown	unknown	unknown	m6Acluster C	unknown	<=53	Alive	Gene.cluster C	-15.0431	Low m6Ascore
TCGA-D8-A1XU-01A	395	0	56	Tumor	TCGA-BRCA	Positive	Positive	Negative	m6Acluster C	NO	>53	Alive	Gene.cluster C	-15.3599	Low m6Ascore
TCGA-AN-A0FJ-01A	242	0	59	Tumor	TCGA-BRCA	Positive	Negative	Negative	m6Acluster B	NO	>53	Alive	Gene.cluster B	-7.96417	High m6Ascore
TCGA-BH-A0DK-01A	423	0	49	Tumor	TCGA-BRCA	Positive	Positive	Negative	m6Acluster C	NO	<=53	Alive	Gene.cluster A	-13.5449	Low m6Ascore
TCGA-B6-A0IJ-01A	7106	0	42	Tumor	TCGA-BRCA	Positive	Positive	Negative	m6Acluster B	NO	<=53	Alive	Gene.cluster B	-7.28103	High m6Ascore
TCGA-LL-A7SZ-01A	594	0	49	Tumor	TCGA-BRCA	unknown	unknown	unknown	m6Acluster A	unknown	<=53	Alive	Gene.cluster A	-8.3804	High m6Ascore
TCGA-A8-A06R-01A	547	0	69	Tumor	TCGA-BRCA	Positive	Negative	unknown	m6Acluster A	NO	>53	Alive	Gene.cluster A	-10.0851	High m6Ascore
TCGA-AO-A128-01A	3248	0	61	Tumor	TCGA-BRCA	Negative	Negative	Negative	m6Acluster B	YES	>53	Alive	Gene.cluster B	-10.1934	High m6Ascore
TCGA-E2-A1BC-01A	501	0	63	Tumor	TCGA-BRCA	Positive	Positive	Negative	m6Acluster B	NO	>53	Alive	Gene.cluster C	-19.5494	Low m6Ascore
TCGA-B6-A0I6-01A	991	1	49	Tumor	TCGA-BRCA	Negative	Negative	unknown	m6Acluster A	unknown	<=53	Dead	Gene.cluster B	-6.46996	High m6Ascore
TCGA-BH-A1ET-01A	2520	1	55	Tumor	TCGA-BRCA	Positive	Positive	Negative	m6Acluster C	NO	>53	Dead	Gene.cluster C	-17.8088	Low m6Ascore
TCGA-A2-A04V-01A	1920	1	39	Tumor	TCGA-BRCA	Positive	Positive	Negative	m6Acluster B	NO	<=53	Dead	Gene.cluster A	-13.1302	High m6Ascore
TCGA-A7-A2KD-01A	679	0	53	Tumor	TCGA-BRCA	unknown	unknown	unknown	m6Acluster B	unknown	<=53	Alive	Gene.cluster A	-12.2606	High m6Ascore
TCGA-A7-A0CE-01A	1074	0	57	Tumor	TCGA-BRCA	Negative	Negative	Negative	m6Acluster B	YES	>53	Alive	Gene.cluster B	-6.45098	High m6Ascore
TCGA-D8-A1JE-01A	575	0	62	Tumor	TCGA-BRCA	Positive	Positive	Negative	m6Acluster C	NO	>53	Alive	Gene.cluster A	-20.7355	Low m6Ascore
TCGA-B6-A0WX-01A	639	1	40	Tumor	TCGA-BRCA	Negative	Negative	Negative	m6Acluster C	YES	<=53	Dead	Gene.cluster B	-9.86574	High m6Ascore
TCGA-A7-A4SB-01A	418	0	56	Tumor	TCGA-BRCA	unknown	unknown	unknown	m6Acluster A	unknown	>53	Alive	Gene.cluster A	-14.1976	Low m6Ascore
TCGA-EW-A1J1-01A	575	0	38	Tumor	TCGA-BRCA	Positive	Positive	Negative	m6Acluster C	NO	<=53	Alive	Gene.cluster A	-20.8716	Low m6Ascore
TCGA-A2-A0YM-01A	965	0	67	Tumor	TCGA-BRCA	Negative	Negative	Negative	m6Acluster B	YES	>53	Alive	Gene.cluster B	-5.67245	High m6Ascore
TCGA-A8-A0A4-01A	396	0	73	Tumor	TCGA-BRCA	Positive	Positive	Negative	m6Acluster A	NO	>53	Alive	Gene.cluster A	-16.0857	Low m6Ascore
TCGA-A2-A0EM-01A	3094	0	73	Tumor	TCGA-BRCA	Positive	Positive	Negative	m6Acluster C	NO	>53	Alive	Gene.cluster A	-14.4711	Low m6Ascore
TCGA-AR-A24X-01A	3004	0	52	Tumor	TCGA-BRCA	Positive	Positive	Negative	m6Acluster B	NO	<=53	Alive	Gene.cluster A	-13.2365	High m6Ascore
TCGA-C8-A132-01A	383	0	56	Tumor	TCGA-BRCA	Positive	Positive	Positive	m6Acluster C	NO	>53	Alive	Gene.cluster C	-16.902	Low m6Ascore
TCGA-AN-A049-01A	19	0	62	Tumor	TCGA-BRCA	Positive	Positive	Negative	m6Acluster B	NO	>53	Alive	Gene.cluster A	-14.5459	Low m6Ascore
TCGA-A2-A0SY-01A	1347	0	62	Tumor	TCGA-BRCA	Positive	Positive	Positive	m6Acluster C	NO	>53	Alive	Gene.cluster A	-15.957	Low m6Ascore
TCGA-B6-A0RU-01A	8605	0	40	Tumor	TCGA-BRCA	Negative	Negative	Negative	m6Acluster C	YES	<=53	Alive	Gene.cluster B	-10.7358	High m6Ascore
TCGA-AR-A0TX-01A	1972	0	64	Tumor	TCGA-BRCA	Positive	Positive	Positive	m6Acluster C	NO	>53	Alive	Gene.cluster A	-11.8366	High m6Ascore
TCGA-BH-A0HQ-01A	1121	0	56	Tumor	TCGA-BRCA	Positive	Positive	Negative	m6Acluster B	NO	>53	Alive	Gene.cluster C	-15.2361	Low m6Ascore
TCGA-E2-A15C-01A	694	0	61	Tumor	TCGA-BRCA	Positive	Positive	Negative	m6Acluster B	NO	>53	Alive	Gene.cluster C	-15.0608	Low m6Ascore
TCGA-AQ-A54N-01A	78	0	51	Tumor	TCGA-BRCA	unknown	unknown	unknown	m6Acluster B	unknown	<=53	Alive	Gene.cluster B	-7.12801	High m6Ascore
TCGA-A8-A07I-01A	426	0	69	Tumor	TCGA-BRCA	Positive	Negative	Positive	m6Acluster C	NO	>53	Alive	Gene.cluster A	-11.8694	High m6Ascore
TCGA-B6-A1KI-01A	2236	0	63	Tumor	TCGA-BRCA	Positive	Positive	Negative	m6Acluster B	NO	>53	Alive	Gene.cluster C	-15.4243	Low m6Ascore
TCGA-B6-A0RH-01A	6456	1	51	Tumor	TCGA-BRCA	Positive	Positive	Positive	m6Acluster C	NO	<=53	Dead	Gene.cluster A	-10.4067	High m6Ascore
TCGA-BH-A5IZ-01A	567	0	51	Tumor	TCGA-BRCA	unknown	unknown	unknown	m6Acluster B	unknown	<=53	Alive	Gene.cluster B	-4.86396	High m6Ascore
TCGA-AN-A0XU-01A	10	0	54	Tumor	TCGA-BRCA	Negative	Negative	Negative	m6Acluster C	YES	>53	Alive	Gene.cluster B	-5.70696	High m6Ascore
TCGA-LD-A74U-01A	402	0	79	Tumor	TCGA-BRCA	unknown	unknown	unknown	m6Acluster C	unknown	>53	Alive	Gene.cluster C	-14.2598	Low m6Ascore
TCGA-B6-A401-01A	2596	0	47	Tumor	TCGA-BRCA	unknown	unknown	unknown	m6Acluster A	unknown	<=53	Alive	Gene.cluster C	-11.4017	High m6Ascore
TCGA-BH-A0BR-01A	2330	0	59	Tumor	TCGA-BRCA	Positive	Positive	Negative	m6Acluster C	NO	>53	Alive	Gene.cluster C	-12.0518	High m6Ascore
TCGA-A8-A07G-01A	577	0	65	Tumor	TCGA-BRCA	Positive	Positive	Negative	m6Acluster C	NO	>53	Alive	Gene.cluster C	-17.0033	Low m6Ascore
TCGA-A2-A0EN-01A	4088	0	70	Tumor	TCGA-BRCA	Positive	Positive	Negative	m6Acluster B	NO	>53	Alive	Gene.cluster C	-16.1308	Low m6Ascore
TCGA-OK-A5Q2-01A	64	0	59	Tumor	TCGA-BRCA	unknown	unknown	unknown	m6Acluster A	unknown	>53	Alive	Gene.cluster A	-12.7342	High m6Ascore
TCGA-A8-A084-01A	458	0	81	Tumor	TCGA-BRCA	Positive	Negative	Negative	m6Acluster B	NO	>53	Alive	Gene.cluster A	-15.1491	Low m6Ascore
TCGA-BH-A0DS-01A	78	0	71	Tumor	TCGA-BRCA	Positive	Positive	Negative	m6Acluster A	NO	>53	Alive	Gene.cluster C	-12.1223	High m6Ascore
TCGA-A8-A09I-01A	1371	0	84	Tumor	TCGA-BRCA	Positive	Positive	Positive	m6Acluster B	NO	>53	Alive	Gene.cluster B	-10.1376	High m6Ascore
TCGA-GM-A3XL-01A	2108	0	49	Tumor	TCGA-BRCA	unknown	unknown	unknown	m6Acluster B	unknown	<=53	Alive	Gene.cluster B	-5.87192	High m6Ascore
TCGA-W8-A86G-01A	347	0	66	Tumor	TCGA-BRCA	unknown	unknown	unknown	m6Acluster A	unknown	>53	Alive	Gene.cluster C	-14.5948	Low m6Ascore
TCGA-AO-A12F-01A	1842	0	36	Tumor	TCGA-BRCA	Negative	Negative	Negative	m6Acluster B	YES	<=53	Alive	Gene.cluster B	-7.05138	High m6Ascore
TCGA-BH-A0HK-01A	178	0	81	Tumor	TCGA-BRCA	Positive	Negative	Negative	m6Acluster C	NO	>53	Alive	Gene.cluster C	-12.8864	High m6Ascore
TCGA-A8-A06Q-01A	31	0	63	Tumor	TCGA-BRCA	Positive	Positive	Negative	m6Acluster A	NO	>53	Alive	Gene.cluster A	-11.2296	High m6Ascore
TCGA-BH-A42U-01A	3364	0	80	Tumor	TCGA-BRCA	unknown	unknown	unknown	m6Acluster C	unknown	>53	Alive	Gene.cluster C	-13.9149	Low m6Ascore
TCGA-AQ-A04L-01B	3957	0	48	Tumor	TCGA-BRCA	Positive	Negative	Positive	m6Acluster A	NO	<=53	Alive	Gene.cluster C	-10.5318	High m6Ascore
TCGA-AR-A1AO-01A	2618	0	47	Tumor	TCGA-BRCA	Positive	Negative	Negative	m6Acluster C	NO	<=53	Alive	Gene.cluster C	-11.7506	High m6Ascore
TCGA-Z7-A8R5-01A	3287	0	61	Tumor	TCGA-BRCA	unknown	unknown	unknown	m6Acluster C	unknown	>53	Alive	Gene.cluster C	-13.8178	Low m6Ascore
TCGA-B6-A0I1-01A	2361	1	73	Tumor	TCGA-BRCA	unknown	unknown	unknown	m6Acluster B	unknown	>53	Dead	Gene.cluster B	-5.98868	High m6Ascore
TCGA-EW-A1PA-01A	575	0	59	Tumor	TCGA-BRCA	Positive	Positive	Negative	m6Acluster C	NO	>53	Alive	Gene.cluster A	-14.8115	Low m6Ascore
TCGA-BH-A0W4-01A	759	0	46	Tumor	TCGA-BRCA	Positive	Positive	Negative	m6Acluster C	NO	<=53	Alive	Gene.cluster C	-17.2251	Low m6Ascore
TCGA-A2-A3XZ-01A	1532	0	46	Tumor	TCGA-BRCA	unknown	unknown	unknown	m6Acluster A	unknown	<=53	Alive	Gene.cluster B	-10.3461	High m6Ascore
TCGA-A7-A26H-01A	724	0	72	Tumor	TCGA-BRCA	Positive	Negative	Positive	m6Acluster C	NO	>53	Alive	Gene.cluster C	-13.4706	Low m6Ascore
TCGA-E2-A1B0-01A	1631	0	50	Tumor	TCGA-BRCA	Negative	Negative	Positive	m6Acluster C	NO	<=53	Alive	Gene.cluster B	-7.8834	High m6Ascore
TCGA-BH-A1EU-01A	1286	1	83	Tumor	TCGA-BRCA	Positive	Positive	Negative	m6Acluster B	NO	>53	Dead	Gene.cluster C	-18.0858	Low m6Ascore
TCGA-EW-A1P4-01A	907	0	43	Tumor	TCGA-BRCA	Negative	Negative	Negative	m6Acluster B	YES	<=53	Alive	Gene.cluster B	-6.21263	High m6Ascore
TCGA-E2-A10E-01A	865	0	64	Tumor	TCGA-BRCA	Positive	Positive	Negative	m6Acluster C	NO	>53	Alive	Gene.cluster C	-16.8022	Low m6Ascore
TCGA-EW-A1P0-01A	1251	0	55	Tumor	TCGA-BRCA	Positive	Negative	Negative	m6Acluster B	NO	>53	Alive	Gene.cluster A	-14.2587	Low m6Ascore
TCGA-EW-A6S9-01A	463	0	34	Tumor	TCGA-BRCA	unknown	unknown	unknown	m6Acluster A	unknown	<=53	Alive	Gene.cluster A	-14.2865	Low m6Ascore
TCGA-A2-A25B-01A	1291	0	39	Tumor	TCGA-BRCA	Positive	Positive	Negative	m6Acluster B	NO	<=53	Alive	Gene.cluster A	-12.5847	High m6Ascore
TCGA-LL-A6FR-01A	489	0	50	Tumor	TCGA-BRCA	unknown	unknown	unknown	m6Acluster B	unknown	<=53	Alive	Gene.cluster B	-8.04307	High m6Ascore
TCGA-AR-A5QM-01A	2231	0	62	Tumor	TCGA-BRCA	unknown	unknown	unknown	m6Acluster C	unknown	>53	Alive	Gene.cluster C	-15.4409	Low m6Ascore
TCGA-EW-A1P5-01A	703	0	77	Tumor	TCGA-BRCA	Positive	Positive	Negative	m6Acluster C	NO	>53	Alive	Gene.cluster A	-14.2254	Low m6Ascore
TCGA-E2-A14O-01A	1359	0	76	Tumor	TCGA-BRCA	Positive	Positive	Negative	m6Acluster C	NO	>53	Alive	Gene.cluster A	-12.6623	High m6Ascore
TCGA-AN-A0AR-01A	10	0	55	Tumor	TCGA-BRCA	Negative	Negative	Negative	m6Acluster C	YES	>53	Alive	Gene.cluster B	-6.18908	High m6Ascore
TCGA-E9-A22D-01A	1248	0	38	Tumor	TCGA-BRCA	Positive	Positive	Positive	m6Acluster C	NO	<=53	Alive	Gene.cluster A	-13.2295	High m6Ascore
TCGA-A2-A0CS-01A	2348	1	73	Tumor	TCGA-BRCA	Positive	Positive	Negative	m6Acluster C	NO	>53	Dead	Gene.cluster A	-18.1677	Low m6Ascore
TCGA-E2-A1IF-01A	1138	0	74	Tumor	TCGA-BRCA	Positive	Positive	Negative	m6Acluster C	NO	>53	Alive	Gene.cluster C	-16.0838	Low m6Ascore
TCGA-E2-A1IE-01A	2362	0	61	Tumor	TCGA-BRCA	Positive	Positive	Negative	m6Acluster A	NO	>53	Alive	Gene.cluster A	-16.5934	Low m6Ascore
TCGA-BH-A0BW-01A	2371	0	71	Tumor	TCGA-BRCA	Negative	Negative	Negative	m6Acluster B	YES	>53	Alive	Gene.cluster B	-10.7926	High m6Ascore
TCGA-E2-A1AZ-01A	2329	0	63	Tumor	TCGA-BRCA	Negative	Negative	Negative	m6Acluster B	YES	>53	Alive	Gene.cluster B	-8.68174	High m6Ascore
TCGA-D8-A27N-01A	519	0	36	Tumor	TCGA-BRCA	Positive	Positive	Positive	m6Acluster A	NO	<=53	Alive	Gene.cluster A	-17.022	Low m6Ascore
TCGA-A2-A0CT-01A	2289	0	71	Tumor	TCGA-BRCA	Positive	Negative	Negative	m6Acluster C	NO	>53	Alive	Gene.cluster A	-14.6866	Low m6Ascore
TCGA-A8-A09R-01A	273	0	82	Tumor	TCGA-BRCA	Positive	Positive	Negative	m6Acluster B	NO	>53	Alive	Gene.cluster A	-17.2993	Low m6Ascore
TCGA-B6-A0RE-01A	7777	0	61	Tumor	TCGA-BRCA	Negative	Negative	Negative	m6Acluster A	YES	>53	Alive	Gene.cluster B	-6.69076	High m6Ascore
TCGA-E9-A249-01A	217	0	45	Tumor	TCGA-BRCA	unknown	unknown	Negative	m6Acluster A	unknown	<=53	Alive	Gene.cluster A	-12.7433	High m6Ascore
TCGA-E2-A1B5-01A	984	0	46	Tumor	TCGA-BRCA	Positive	Positive	Negative	m6Acluster C	NO	<=53	Alive	Gene.cluster C	-14.6319	Low m6Ascore
TCGA-A2-A25A-01A	3276	0	44	Tumor	TCGA-BRCA	Positive	Positive	Negative	m6Acluster C	NO	<=53	Alive	Gene.cluster C	-15.8001	Low m6Ascore
TCGA-AO-A03O-01A	2483	1	69	Tumor	TCGA-BRCA	Positive	Positive	Negative	m6Acluster B	NO	>53	Dead	Gene.cluster B	-9.98178	High m6Ascore
TCGA-E9-A22A-01A	1189	0	74	Tumor	TCGA-BRCA	Positive	Negative	Negative	m6Acluster B	NO	>53	Alive	Gene.cluster A	-12.0084	High m6Ascore
TCGA-BH-A0GZ-01A	328	0	62	Tumor	TCGA-BRCA	Positive	Positive	Negative	m6Acluster A	NO	>53	Alive	Gene.cluster A	-13.7454	Low m6Ascore
TCGA-BH-A1FD-01A	1009	1	68	Tumor	TCGA-BRCA	Positive	Positive	Negative	m6Acluster A	NO	>53	Dead	Gene.cluster A	-10.7447	High m6Ascore
TCGA-A1-A0SH-01A	1437	0	39	Tumor	TCGA-BRCA	Negative	Positive	Negative	m6Acluster C	NO	<=53	Alive	Gene.cluster C	-14.8132	Low m6Ascore
TCGA-E2-A10A-01A	1229	0	41	Tumor	TCGA-BRCA	Positive	Positive	Negative	m6Acluster C	NO	<=53	Alive	Gene.cluster A	-15.3332	Low m6Ascore
TCGA-B6-A0IO-01A	5042	0	66	Tumor	TCGA-BRCA	Positive	unknown	Negative	m6Acluster C	NO	>53	Alive	Gene.cluster A	-14.538	Low m6Ascore
TCGA-BH-A1FR-01A	1642	1	73	Tumor	TCGA-BRCA	Positive	Positive	Negative	m6Acluster B	NO	>53	Dead	Gene.cluster A	-16.8824	Low m6Ascore
TCGA-D8-A143-01A	431	0	51	Tumor	TCGA-BRCA	Negative	Negative	Negative	m6Acluster C	YES	<=53	Alive	Gene.cluster B	-7.78215	High m6Ascore
TCGA-AO-A03R-01A	2091	0	57	Tumor	TCGA-BRCA	Positive	Positive	Negative	m6Acluster A	NO	>53	Alive	Gene.cluster A	-12.3731	High m6Ascore
TCGA-BH-A0E0-01A	134	0	38	Tumor	TCGA-BRCA	Negative	Negative	Negative	m6Acluster B	YES	<=53	Alive	Gene.cluster B	-6.6318	High m6Ascore
TCGA-A8-A0AD-01A	1157	0	83	Tumor	TCGA-BRCA	Positive	Positive	Negative	m6Acluster C	NO	>53	Alive	Gene.cluster A	-14.7863	Low m6Ascore
TCGA-GM-A2DI-01A	2590	0	52	Tumor	TCGA-BRCA	Negative	Negative	unknown	m6Acluster B	unknown	<=53	Alive	Gene.cluster A	-15.7506	Low m6Ascore
TCGA-E9-A6HE-01A	847	0	45	Tumor	TCGA-BRCA	unknown	unknown	unknown	m6Acluster A	unknown	<=53	Alive	Gene.cluster A	-12.052	High m6Ascore
TCGA-BH-A0B3-01A	1203	0	53	Tumor	TCGA-BRCA	Negative	Negative	Negative	m6Acluster B	YES	<=53	Alive	Gene.cluster B	-6.35591	High m6Ascore
TCGA-AR-A0TU-01A	709	0	35	Tumor	TCGA-BRCA	Negative	Negative	Negative	m6Acluster B	YES	<=53	Alive	Gene.cluster B	-5.42241	High m6Ascore
TCGA-LQ-A4E4-01A	849	0	73	Tumor	TCGA-BRCA	unknown	unknown	unknown	m6Acluster A	unknown	>53	Alive	Gene.cluster A	-11.7636	High m6Ascore
TCGA-PL-A8LY-01A	8	0	30	Tumor	TCGA-BRCA	unknown	unknown	unknown	m6Acluster C	unknown	<=53	Alive	Gene.cluster C	-12.8527	High m6Ascore
TCGA-BH-A1FU-01A	1688	1	44	Tumor	TCGA-BRCA	Negative	Negative	Positive	m6Acluster C	NO	<=53	Dead	Gene.cluster B	-11.2845	High m6Ascore
TCGA-A8-A09D-01A	1522	0	47	Tumor	TCGA-BRCA	Positive	Positive	Negative	m6Acluster B	NO	<=53	Alive	Gene.cluster A	-12.9471	High m6Ascore
TCGA-B6-A3ZX-01A	1152	1	50	Tumor	TCGA-BRCA	unknown	unknown	unknown	m6Acluster A	unknown	<=53	Dead	Gene.cluster B	-10.1818	High m6Ascore
TCGA-A7-A5ZV-01A	368	0	62	Tumor	TCGA-BRCA	unknown	unknown	unknown	m6Acluster C	unknown	>53	Alive	Gene.cluster B	-6.09853	High m6Ascore
TCGA-BH-A0AY-01A	777	0	62	Tumor	TCGA-BRCA	Positive	Positive	Negative	m6Acluster C	NO	>53	Alive	Gene.cluster A	-10.6376	High m6Ascore
TCGA-A7-A4SD-01A	441	0	52	Tumor	TCGA-BRCA	unknown	unknown	unknown	m6Acluster B	unknown	<=53	Alive	Gene.cluster B	-7.76676	High m6Ascore
TCGA-AO-A03L-01A	2442	0	34	Tumor	TCGA-BRCA	Positive	Positive	Negative	m6Acluster B	NO	<=53	Alive	Gene.cluster A	-14.567	Low m6Ascore
TCGA-A2-A0EX-01A	752	0	46	Tumor	TCGA-BRCA	Positive	Positive	Negative	m6Acluster A	NO	<=53	Alive	Gene.cluster C	-15.5605	Low m6Ascore
TCGA-GM-A2DM-01A	3226	0	57	Tumor	TCGA-BRCA	Positive	Positive	unknown	m6Acluster C	NO	>53	Alive	Gene.cluster C	-20.3477	Low m6Ascore
TCGA-BH-A0DO-01B	1644	0	78	Tumor	TCGA-BRCA	Positive	Positive	Negative	m6Acluster C	NO	>53	Alive	Gene.cluster C	-16.2624	Low m6Ascore
TCGA-HN-A2OB-01A	1900	1	45	Tumor	TCGA-BRCA	unknown	unknown	unknown	m6Acluster C	unknown	<=53	Dead	Gene.cluster C	-15.8987	Low m6Ascore
TCGA-A2-A0CM-01A	754	1	40	Tumor	TCGA-BRCA	Negative	Negative	Negative	m6Acluster B	YES	<=53	Dead	Gene.cluster B	-6.31719	High m6Ascore
TCGA-A2-A4S0-01A	706	0	77	Tumor	TCGA-BRCA	unknown	unknown	unknown	m6Acluster C	unknown	>53	Alive	Gene.cluster C	-13.385	Low m6Ascore
TCGA-BH-A0H9-01A	1247	0	69	Tumor	TCGA-BRCA	Positive	Positive	Negative	m6Acluster C	NO	>53	Alive	Gene.cluster A	-14.5186	Low m6Ascore
TCGA-B6-A0IP-01A	3926	1	74	Tumor	TCGA-BRCA	Positive	Positive	Negative	m6Acluster A	NO	>53	Dead	Gene.cluster A	-15.1187	Low m6Ascore
TCGA-C8-A12X-01A	385	0	62	Tumor	TCGA-BRCA	Positive	Positive	Negative	m6Acluster B	NO	>53	Alive	Gene.cluster A	-14.4237	Low m6Ascore
TCGA-AN-A0AL-01A	227	0	41	Tumor	TCGA-BRCA	Negative	Negative	Negative	m6Acluster B	YES	<=53	Alive	Gene.cluster B	-8.62347	High m6Ascore
TCGA-LD-A9QF-01A	323	0	73	Tumor	TCGA-BRCA	unknown	unknown	unknown	m6Acluster C	unknown	>53	Alive	Gene.cluster C	-10.2163	High m6Ascore
TCGA-E2-A152-01A	2128	0	56	Tumor	TCGA-BRCA	Positive	Negative	Positive	m6Acluster B	NO	>53	Alive	Gene.cluster A	-10.8092	High m6Ascore
TCGA-BH-A1FE-06A	2273	1	31	Tumor	TCGA-BRCA	unknown	unknown	unknown	m6Acluster C	unknown	<=53	Dead	Gene.cluster C	-11.8712	High m6Ascore
TCGA-BH-A18N-01A	468	1	88	Tumor	TCGA-BRCA	Positive	Positive	Negative	m6Acluster B	NO	>53	Dead	Gene.cluster A	-16.8528	Low m6Ascore
TCGA-C8-A1HN-01A	394	0	56	Tumor	TCGA-BRCA	Positive	Positive	unknown	m6Acluster C	NO	>53	Alive	Gene.cluster A	-13.909	Low m6Ascore
TCGA-AN-A0FK-01A	213	0	88	Tumor	TCGA-BRCA	Positive	Positive	Negative	m6Acluster B	NO	>53	Alive	Gene.cluster A	-15.102	Low m6Ascore
TCGA-B6-A0IE-01A	1993	1	38	Tumor	TCGA-BRCA	Negative	Negative	Negative	m6Acluster C	YES	<=53	Dead	Gene.cluster A	-10.5561	High m6Ascore
TCGA-B6-A400-01A	215	0	43	Tumor	TCGA-BRCA	unknown	unknown	unknown	m6Acluster A	unknown	<=53	Alive	Gene.cluster B	-7.11347	High m6Ascore
TCGA-GM-A2DB-01A	2406	0	62	Tumor	TCGA-BRCA	Negative	Negative	unknown	m6Acluster A	unknown	>53	Alive	Gene.cluster B	-7.17715	High m6Ascore
TCGA-AC-A2FK-01A	2650	0	45	Tumor	TCGA-BRCA	unknown	unknown	unknown	m6Acluster C	unknown	<=53	Alive	Gene.cluster C	-15.1373	Low m6Ascore
TCGA-BH-A0HU-01A	392	0	52	Tumor	TCGA-BRCA	Positive	Positive	Negative	m6Acluster A	NO	<=53	Alive	Gene.cluster A	-10.9857	High m6Ascore
TCGA-D8-A140-01A	403	0	62	Tumor	TCGA-BRCA	Positive	Positive	Positive	m6Acluster B	NO	>53	Alive	Gene.cluster A	-15.9081	Low m6Ascore
TCGA-A7-A0CD-01A	1165	0	66	Tumor	TCGA-BRCA	Positive	Positive	Negative	m6Acluster B	NO	>53	Alive	Gene.cluster A	-19.8572	Low m6Ascore
TCGA-D8-A1JF-01A	366	0	79	Tumor	TCGA-BRCA	Negative	Negative	Negative	m6Acluster B	YES	>53	Alive	Gene.cluster C	-12.2607	High m6Ascore
TCGA-A2-A4S1-01A	820	0	66	Tumor	TCGA-BRCA	unknown	unknown	unknown	m6Acluster C	unknown	>53	Alive	Gene.cluster A	-10.2296	High m6Ascore
TCGA-5T-A9QA-01A	303	0	52	Tumor	TCGA-BRCA	unknown	unknown	unknown	m6Acluster A	unknown	<=53	Alive	Gene.cluster A	-7.02237	High m6Ascore
TCGA-AR-A2LK-01A	1649	1	62	Tumor	TCGA-BRCA	unknown	unknown	unknown	m6Acluster A	unknown	>53	Dead	Gene.cluster A	-14.3515	Low m6Ascore
TCGA-AR-A1AH-01A	3807	0	51	Tumor	TCGA-BRCA	Positive	Negative	Negative	m6Acluster B	NO	<=53	Alive	Gene.cluster B	-7.50568	High m6Ascore
TCGA-AR-A254-01A	2605	0	50	Tumor	TCGA-BRCA	Positive	Positive	Positive	m6Acluster B	NO	<=53	Alive	Gene.cluster B	-10.3705	High m6Ascore
TCGA-E2-A1IO-01A	1855	0	37	Tumor	TCGA-BRCA	Positive	Positive	Negative	m6Acluster C	NO	<=53	Alive	Gene.cluster C	-15.145	Low m6Ascore
TCGA-S3-A6ZF-01A	572	0	64	Tumor	TCGA-BRCA	unknown	unknown	unknown	m6Acluster C	unknown	>53	Alive	Gene.cluster A	-12.7649	High m6Ascore
TCGA-B6-A0IB-01A	3941	1	64	Tumor	TCGA-BRCA	Positive	Positive	Negative	m6Acluster A	NO	>53	Dead	Gene.cluster A	-12.087	High m6Ascore
TCGA-A8-A07J-01A	365	0	35	Tumor	TCGA-BRCA	Positive	Positive	Negative	m6Acluster B	NO	<=53	Alive	Gene.cluster C	-16.6975	Low m6Ascore
TCGA-AN-A0FV-01A	10	0	58	Tumor	TCGA-BRCA	Negative	Negative	Positive	m6Acluster B	NO	>53	Alive	Gene.cluster A	-11.3043	High m6Ascore
TCGA-AN-A0XP-01A	9	0	69	Tumor	TCGA-BRCA	Positive	Positive	Negative	m6Acluster B	NO	>53	Alive	Gene.cluster C	-16.3733	Low m6Ascore
TCGA-A8-A08Z-01A	1217	0	76	Tumor	TCGA-BRCA	Positive	Positive	Negative	m6Acluster C	NO	>53	Alive	Gene.cluster A	-13.5095	Low m6Ascore
TCGA-E9-A226-01A	1048	1	45	Tumor	TCGA-BRCA	unknown	unknown	Negative	m6Acluster B	unknown	<=53	Dead	Gene.cluster A	-13.0324	High m6Ascore
TCGA-AR-A1AW-01A	2632	0	65	Tumor	TCGA-BRCA	Positive	Positive	Negative	m6Acluster B	NO	>53	Alive	Gene.cluster A	-12.4095	High m6Ascore
TCGA-GI-A2C9-01A	3342	0	58	Tumor	TCGA-BRCA	unknown	unknown	unknown	m6Acluster B	unknown	>53	Alive	Gene.cluster B	-8.4483	High m6Ascore
TCGA-EW-A6SA-01A	510	0	59	Tumor	TCGA-BRCA	unknown	unknown	unknown	m6Acluster A	unknown	>53	Alive	Gene.cluster A	-13.0566	High m6Ascore
TCGA-E9-A1NG-01A	786	1	62	Tumor	TCGA-BRCA	Positive	Positive	Negative	m6Acluster C	NO	>53	Dead	Gene.cluster C	-14.7529	Low m6Ascore
TCGA-A8-A07L-01A	975	0	58	Tumor	TCGA-BRCA	Positive	Positive	Negative	m6Acluster A	NO	>53	Alive	Gene.cluster A	-12.7314	High m6Ascore
TCGA-E2-A15L-01A	626	0	65	Tumor	TCGA-BRCA	Positive	Positive	Negative	m6Acluster B	NO	>53	Alive	Gene.cluster A	-15.3899	Low m6Ascore
TCGA-D8-A1JI-01A	577	0	54	Tumor	TCGA-BRCA	Positive	Positive	Negative	m6Acluster A	NO	>53	Alive	Gene.cluster A	-16.6765	Low m6Ascore
TCGA-GM-A2DO-01A	2596	0	54	Tumor	TCGA-BRCA	Positive	Positive	unknown	m6Acluster A	NO	>53	Alive	Gene.cluster A	-13.9463	Low m6Ascore
TCGA-EW-A1P6-01A	562	0	64	Tumor	TCGA-BRCA	Positive	Positive	Negative	m6Acluster A	NO	>53	Alive	Gene.cluster A	-13.817	Low m6Ascore
TCGA-AR-A1AI-01A	3296	0	47	Tumor	TCGA-BRCA	Negative	Negative	Negative	m6Acluster C	YES	<=53	Alive	Gene.cluster B	-7.30944	High m6Ascore
TCGA-AR-A0U3-01A	4080	0	59	Tumor	TCGA-BRCA	Positive	Positive	Negative	m6Acluster A	NO	>53	Alive	Gene.cluster A	-13.3156	High m6Ascore
TCGA-A2-A0ES-01A	2190	0	52	Tumor	TCGA-BRCA	Positive	Positive	Negative	m6Acluster C	NO	<=53	Alive	Gene.cluster C	-16.9684	Low m6Ascore
TCGA-A8-A06P-01A	396	0	63	Tumor	TCGA-BRCA	Positive	Positive	Negative	m6Acluster B	NO	>53	Alive	Gene.cluster C	-14.3663	Low m6Ascore
TCGA-S3-AA12-01A	574	0	82	Tumor	TCGA-BRCA	unknown	unknown	unknown	m6Acluster C	unknown	>53	Alive	Gene.cluster A	-14.2877	Low m6Ascore
TCGA-E9-A3Q9-01A	1001	0	78	Tumor	TCGA-BRCA	unknown	unknown	unknown	m6Acluster C	unknown	>53	Alive	Gene.cluster C	-21.2767	Low m6Ascore
TCGA-BH-A0HX-01A	829	0	54	Tumor	TCGA-BRCA	Positive	Positive	Negative	m6Acluster B	NO	>53	Alive	Gene.cluster A	-14.5532	Low m6Ascore
TCGA-AC-A3W7-01A	471	0	66	Tumor	TCGA-BRCA	unknown	unknown	unknown	m6Acluster A	unknown	>53	Alive	Gene.cluster C	-16.9561	Low m6Ascore
TCGA-AO-A124-01A	3506	0	38	Tumor	TCGA-BRCA	Negative	Negative	Negative	m6Acluster B	YES	<=53	Alive	Gene.cluster B	-6.56894	High m6Ascore
TCGA-AC-A5XU-01A	455	0	74	Tumor	TCGA-BRCA	unknown	unknown	unknown	m6Acluster A	unknown	>53	Alive	Gene.cluster A	-11.2486	High m6Ascore
TCGA-LL-A6FQ-01A	80	0	77	Tumor	TCGA-BRCA	unknown	unknown	unknown	m6Acluster A	unknown	>53	Alive	Gene.cluster A	-14.6114	Low m6Ascore
TCGA-AQ-A1H2-01A	475	0	84	Tumor	TCGA-BRCA	Positive	Positive	Positive	m6Acluster C	NO	>53	Alive	Gene.cluster C	-16.0959	Low m6Ascore
TCGA-BH-A0DQ-01A	98	0	42	Tumor	TCGA-BRCA	Positive	Positive	Negative	m6Acluster B	NO	<=53	Alive	Gene.cluster A	-16.3498	Low m6Ascore
TCGA-E2-A106-01A	2541	0	34	Tumor	TCGA-BRCA	Positive	Positive	Negative	m6Acluster B	NO	<=53	Alive	Gene.cluster A	-13.9178	Low m6Ascore
TCGA-A2-A25F-01A	322	0	66	Tumor	TCGA-BRCA	Negative	Positive	Negative	m6Acluster B	NO	>53	Alive	Gene.cluster B	-12.6631	High m6Ascore
TCGA-AN-A0AT-01A	10	0	62	Tumor	TCGA-BRCA	Negative	Negative	Negative	m6Acluster B	YES	>53	Alive	Gene.cluster B	-6.92629	High m6Ascore
TCGA-D8-A27T-01A	398	0	53	Tumor	TCGA-BRCA	Positive	Positive	Negative	m6Acluster A	NO	<=53	Alive	Gene.cluster A	-14.991	Low m6Ascore
TCGA-A2-A04X-01A	1686	0	34	Tumor	TCGA-BRCA	Positive	Positive	Positive	m6Acluster B	NO	<=53	Alive	Gene.cluster A	-14.573	Low m6Ascore
TCGA-A2-A3XT-01A	2770	0	45	Tumor	TCGA-BRCA	unknown	unknown	unknown	m6Acluster B	unknown	<=53	Alive	Gene.cluster B	-7.64224	High m6Ascore
TCGA-AR-A0TY-01A	1699	1	54	Tumor	TCGA-BRCA	Positive	Negative	Negative	m6Acluster B	NO	>53	Dead	Gene.cluster B	-9.4378	High m6Ascore
TCGA-A2-A0YG-01A	666	0	63	Tumor	TCGA-BRCA	Positive	Positive	Positive	m6Acluster C	NO	>53	Alive	Gene.cluster B	-11.1028	High m6Ascore
TCGA-B6-A0WZ-01A	6292	0	50	Tumor	TCGA-BRCA	Positive	Positive	Negative	m6Acluster C	NO	<=53	Alive	Gene.cluster A	-14.4508	Low m6Ascore
TCGA-A7-A5ZX-01A	336	0	48	Tumor	TCGA-BRCA	unknown	unknown	unknown	m6Acluster C	unknown	<=53	Alive	Gene.cluster C	-16.1959	Low m6Ascore
TCGA-AC-A23G-01A	2248	0	76	Tumor	TCGA-BRCA	unknown	unknown	unknown	m6Acluster C	unknown	>53	Alive	Gene.cluster C	-13.4475	Low m6Ascore
TCGA-GM-A2DA-01A	6593	1	46	Tumor	TCGA-BRCA	Positive	Positive	unknown	m6Acluster B	NO	<=53	Dead	Gene.cluster A	-12.1982	High m6Ascore
TCGA-B6-A0X1-01A	7455	1	48	Tumor	TCGA-BRCA	Negative	Negative	unknown	m6Acluster B	unknown	<=53	Dead	Gene.cluster B	-6.61805	High m6Ascore
TCGA-AO-A12E-01A	2142	0	51	Tumor	TCGA-BRCA	Positive	Positive	Negative	m6Acluster B	NO	<=53	Alive	Gene.cluster C	-14.6591	Low m6Ascore
TCGA-AR-A250-01A	2707	0	58	Tumor	TCGA-BRCA	Positive	Negative	Positive	m6Acluster B	NO	>53	Alive	Gene.cluster A	-15.6319	Low m6Ascore
TCGA-A8-A06O-01A	396	0	60	Tumor	TCGA-BRCA	Positive	Positive	Negative	m6Acluster B	NO	>53	Alive	Gene.cluster A	-12.6516	High m6Ascore
TCGA-AO-A12G-01A	1639	0	75	Tumor	TCGA-BRCA	Positive	Positive	Negative	m6Acluster B	NO	>53	Alive	Gene.cluster A	-13.5947	Low m6Ascore
TCGA-A7-A3IY-01A	345	0	71	Tumor	TCGA-BRCA	unknown	unknown	unknown	m6Acluster C	unknown	>53	Alive	Gene.cluster C	-14.3968	Low m6Ascore
TCGA-BH-A1EY-01A	538	1	79	Tumor	TCGA-BRCA	Positive	Positive	Negative	m6Acluster A	NO	>53	Dead	Gene.cluster C	-15.0015	Low m6Ascore
TCGA-A8-A079-01A	274	0	69	Tumor	TCGA-BRCA	Positive	Positive	Negative	m6Acluster A	NO	>53	Alive	Gene.cluster A	-12.7731	High m6Ascore
TCGA-AO-A03P-01A	2911	1	54	Tumor	TCGA-BRCA	Positive	Positive	Negative	m6Acluster A	NO	>53	Dead	Gene.cluster A	-13.0849	High m6Ascore
TCGA-E2-A572-01A	1208	0	72	Tumor	TCGA-BRCA	unknown	unknown	unknown	m6Acluster C	unknown	>53	Alive	Gene.cluster C	-20.8825	Low m6Ascore
TCGA-A2-A0YH-01A	659	0	53	Tumor	TCGA-BRCA	Positive	Positive	Negative	m6Acluster B	NO	<=53	Alive	Gene.cluster A	-13.6181	Low m6Ascore
TCGA-E2-A15G-01A	554	0	76	Tumor	TCGA-BRCA	Positive	Positive	Negative	m6Acluster A	NO	>53	Alive	Gene.cluster A	-16.0505	Low m6Ascore
TCGA-C8-A12M-01A	358	0	70	Tumor	TCGA-BRCA	Positive	Negative	unknown	m6Acluster A	NO	>53	Alive	Gene.cluster A	-15.3368	Low m6Ascore
TCGA-AR-A0TV-01A	2288	0	66	Tumor	TCGA-BRCA	Positive	Positive	Negative	m6Acluster C	NO	>53	Alive	Gene.cluster A	-13.0395	High m6Ascore
TCGA-A7-A13G-01B	718	0	79	Tumor	TCGA-BRCA	Positive	Positive	Negative	m6Acluster C	NO	>53	Alive	Gene.cluster C	-14.9404	Low m6Ascore
TCGA-A8-A07E-01A	608	0	81	Tumor	TCGA-BRCA	Positive	Positive	Negative	m6Acluster A	NO	>53	Alive	Gene.cluster A	-15.3635	Low m6Ascore
TCGA-E9-A1N9-01A	1101	0	58	Tumor	TCGA-BRCA	Negative	Positive	Negative	m6Acluster B	NO	>53	Alive	Gene.cluster B	-12.3224	High m6Ascore
TCGA-BH-A0H3-01A	1928	0	46	Tumor	TCGA-BRCA	Positive	Positive	Negative	m6Acluster C	NO	<=53	Alive	Gene.cluster C	-15.2514	Low m6Ascore
TCGA-AR-A1AY-01A	1026	0	65	Tumor	TCGA-BRCA	Negative	Negative	Negative	m6Acluster B	YES	>53	Alive	Gene.cluster B	-7.82327	High m6Ascore
TCGA-A2-A0D4-01A	767	0	37	Tumor	TCGA-BRCA	Positive	Positive	Negative	m6Acluster A	NO	<=53	Alive	Gene.cluster A	-13.7006	Low m6Ascore
TCGA-E9-A5UO-01A	785	0	41	Tumor	TCGA-BRCA	unknown	unknown	unknown	m6Acluster C	unknown	<=53	Alive	Gene.cluster A	-13.7665	Low m6Ascore
TCGA-GM-A2DL-01A	3519	0	50	Tumor	TCGA-BRCA	Positive	Positive	unknown	m6Acluster C	NO	<=53	Alive	Gene.cluster A	-11.3702	High m6Ascore
TCGA-EW-A1PD-01A	424	0	61	Tumor	TCGA-BRCA	Positive	Positive	Positive	m6Acluster B	NO	>53	Alive	Gene.cluster A	-17.8692	Low m6Ascore
TCGA-A1-A0SI-01A	635	0	52	Tumor	TCGA-BRCA	Positive	Positive	Negative	m6Acluster B	NO	<=53	Alive	Gene.cluster A	-13.0862	High m6Ascore
TCGA-A2-A0CV-01A	3011	0	41	Tumor	TCGA-BRCA	Positive	Positive	Negative	m6Acluster A	NO	<=53	Alive	Gene.cluster C	-15.4137	Low m6Ascore
TCGA-E2-A15E-06A	630	0	40	Tumor	TCGA-BRCA	unknown	unknown	unknown	m6Acluster A	unknown	<=53	Alive	Gene.cluster A	-16.7482	Low m6Ascore
TCGA-AO-A12B-01A	2989	0	63	Tumor	TCGA-BRCA	Positive	Positive	Negative	m6Acluster A	NO	>53	Alive	Gene.cluster A	-15.4154	Low m6Ascore
TCGA-B6-A408-01A	2072	0	55	Tumor	TCGA-BRCA	unknown	unknown	unknown	m6Acluster C	unknown	>53	Alive	Gene.cluster A	-13.9239	Low m6Ascore
TCGA-OL-A5D7-01A	1780	0	70	Tumor	TCGA-BRCA	unknown	unknown	unknown	m6Acluster A	unknown	>53	Alive	Gene.cluster B	-4.19502	High m6Ascore
TCGA-A2-A0EW-01A	1884	1	53	Tumor	TCGA-BRCA	Positive	Positive	Negative	m6Acluster C	NO	<=53	Dead	Gene.cluster C	-16.6855	Low m6Ascore
TCGA-A2-A0T4-01A	624	0	62	Tumor	TCGA-BRCA	Positive	Positive	Negative	m6Acluster B	NO	>53	Alive	Gene.cluster A	-13.5605	Low m6Ascore
TCGA-C8-A131-01A	411	0	82	Tumor	TCGA-BRCA	Negative	Negative	Negative	m6Acluster A	YES	>53	Alive	Gene.cluster B	-7.93347	High m6Ascore
TCGA-BH-A1EN-01A	2127	1	78	Tumor	TCGA-BRCA	Negative	Negative	Positive	m6Acluster A	NO	>53	Dead	Gene.cluster A	-10.4506	High m6Ascore
TCGA-D8-A3Z5-01A	1015	0	54	Tumor	TCGA-BRCA	unknown	unknown	unknown	m6Acluster A	unknown	>53	Alive	Gene.cluster C	-13.921	Low m6Ascore
TCGA-E9-A247-01A	1186	0	59	Tumor	TCGA-BRCA	unknown	unknown	Negative	m6Acluster C	unknown	>53	Alive	Gene.cluster A	-11.2123	High m6Ascore
TCGA-C8-A12Q-01A	385	1	78	Tumor	TCGA-BRCA	Negative	Negative	Positive	m6Acluster B	NO	>53	Dead	Gene.cluster C	-11.1073	High m6Ascore
TCGA-E2-A1BD-01A	1133	0	53	Tumor	TCGA-BRCA	Positive	Positive	Negative	m6Acluster A	NO	<=53	Alive	Gene.cluster C	-12.9475	High m6Ascore
TCGA-E9-A1RI-01A	1449	0	43	Tumor	TCGA-BRCA	unknown	unknown	unknown	m6Acluster B	unknown	<=53	Alive	Gene.cluster A	-17.0803	Low m6Ascore
TCGA-E2-A105-01A	1308	0	79	Tumor	TCGA-BRCA	Positive	Positive	unknown	m6Acluster B	NO	>53	Alive	Gene.cluster A	-14.0523	Low m6Ascore
TCGA-BH-A0BJ-01A	660	0	41	Tumor	TCGA-BRCA	Positive	Positive	Negative	m6Acluster C	NO	<=53	Alive	Gene.cluster C	-20.6466	Low m6Ascore
TCGA-S3-AA14-01A	529	0	47	Tumor	TCGA-BRCA	unknown	unknown	unknown	m6Acluster C	unknown	<=53	Alive	Gene.cluster C	-13.7751	Low m6Ascore
TCGA-C8-A26V-01A	616	0	47	Tumor	TCGA-BRCA	Positive	Positive	Negative	m6Acluster C	NO	<=53	Alive	Gene.cluster A	-11.2856	High m6Ascore
TCGA-BH-A1FB-01A	3669	1	60	Tumor	TCGA-BRCA	Positive	Positive	Negative	m6Acluster C	NO	>53	Dead	Gene.cluster C	-16.03	Low m6Ascore
TCGA-D8-A1JP-01A	639	0	73	Tumor	TCGA-BRCA	Positive	Positive	Negative	m6Acluster C	NO	>53	Alive	Gene.cluster A	-13.2404	High m6Ascore
TCGA-E2-A14X-01A	972	0	55	Tumor	TCGA-BRCA	Negative	Negative	Negative	m6Acluster B	YES	>53	Alive	Gene.cluster B	-9.04049	High m6Ascore
TCGA-BH-A0E2-01A	435	0	49	Tumor	TCGA-BRCA	Positive	Positive	Negative	m6Acluster B	NO	<=53	Alive	Gene.cluster A	-18.7471	Low m6Ascore
TCGA-PL-A8LZ-01A	302	0	29	Tumor	TCGA-BRCA	unknown	unknown	unknown	m6Acluster B	unknown	<=53	Alive	Gene.cluster B	-8.24783	High m6Ascore
TCGA-LL-A740-01A	441	0	61	Tumor	TCGA-BRCA	unknown	unknown	unknown	m6Acluster A	unknown	>53	Alive	Gene.cluster C	-11.8646	High m6Ascore
TCGA-D8-A1X7-01A	509	0	40	Tumor	TCGA-BRCA	Positive	Positive	Negative	m6Acluster C	NO	<=53	Alive	Gene.cluster A	-15.1709	Low m6Ascore
TCGA-AO-A0JD-01A	2190	0	59	Tumor	TCGA-BRCA	Positive	Positive	Negative	m6Acluster B	NO	>53	Alive	Gene.cluster B	-10.2733	High m6Ascore
TCGA-D8-A1X5-01A	565	0	81	Tumor	TCGA-BRCA	Positive	Positive	Positive	m6Acluster C	NO	>53	Alive	Gene.cluster A	-14.7788	Low m6Ascore
TCGA-E9-A22E-01A	1269	0	56	Tumor	TCGA-BRCA	Positive	Positive	Negative	m6Acluster C	NO	>53	Alive	Gene.cluster C	-13.9607	Low m6Ascore
TCGA-AC-A23E-01A	698	0	50	Tumor	TCGA-BRCA	Positive	Positive	Negative	m6Acluster C	NO	<=53	Alive	Gene.cluster C	-15.1476	Low m6Ascore
TCGA-AR-A0U2-01A	2551	1	47	Tumor	TCGA-BRCA	Positive	Positive	Negative	m6Acluster B	NO	<=53	Dead	Gene.cluster B	-10.6285	High m6Ascore
TCGA-A2-A1FV-01A	714	0	74	Tumor	TCGA-BRCA	Positive	Positive	Negative	m6Acluster A	NO	>53	Alive	Gene.cluster A	-16.5084	Low m6Ascore
TCGA-A8-A09B-01A	365	0	58	Tumor	TCGA-BRCA	Positive	Positive	Negative	m6Acluster C	NO	>53	Alive	Gene.cluster A	-14.7307	Low m6Ascore
TCGA-AN-A0XO-01A	375	0	59	Tumor	TCGA-BRCA	Positive	Negative	Negative	m6Acluster C	NO	>53	Alive	Gene.cluster A	-11.8276	High m6Ascore
TCGA-A7-A425-01A	447	0	70	Tumor	TCGA-BRCA	unknown	unknown	unknown	m6Acluster A	unknown	>53	Alive	Gene.cluster C	-12.8342	High m6Ascore
TCGA-A2-A0CZ-01A	1616	0	46	Tumor	TCGA-BRCA	Positive	Positive	Negative	m6Acluster C	NO	<=53	Alive	Gene.cluster C	-14.6677	Low m6Ascore
TCGA-GM-A3NY-01A	1162	0	72	Tumor	TCGA-BRCA	unknown	unknown	unknown	m6Acluster A	unknown	>53	Alive	Gene.cluster C	-15.388	Low m6Ascore
TCGA-AR-A0U0-01A	1988	0	73	Tumor	TCGA-BRCA	Negative	Negative	Negative	m6Acluster B	YES	>53	Alive	Gene.cluster B	-6.57461	High m6Ascore
TCGA-AR-A24P-01A	84	0	47	Tumor	TCGA-BRCA	Positive	Positive	Negative	m6Acluster B	NO	<=53	Alive	Gene.cluster A	-14.3961	Low m6Ascore
TCGA-AN-A0G0-01A	16	0	56	Tumor	TCGA-BRCA	Negative	Negative	Negative	m6Acluster B	YES	>53	Alive	Gene.cluster B	-6.52625	High m6Ascore
TCGA-AN-A0AM-01A	5	0	56	Tumor	TCGA-BRCA	Positive	Negative	Negative	m6Acluster C	NO	>53	Alive	Gene.cluster B	-9.54857	High m6Ascore
TCGA-BH-A0E6-01A	293	0	69	Tumor	TCGA-BRCA	Negative	Negative	Negative	m6Acluster B	YES	>53	Alive	Gene.cluster B	-6.69029	High m6Ascore
TCGA-E9-A248-01A	59	0	51	Tumor	TCGA-BRCA	unknown	unknown	Negative	m6Acluster B	unknown	<=53	Alive	Gene.cluster B	-9.69034	High m6Ascore
TCGA-B6-A1KN-01A	4233	0	57	Tumor	TCGA-BRCA	Negative	Negative	Positive	m6Acluster A	NO	>53	Alive	Gene.cluster B	-11.0434	High m6Ascore
TCGA-LL-A9Q3-01A	532	0	69	Tumor	TCGA-BRCA	unknown	unknown	unknown	m6Acluster A	unknown	>53	Alive	Gene.cluster C	-16.3421	Low m6Ascore
TCGA-A8-A08B-01A	1156	0	52	Tumor	TCGA-BRCA	Positive	Negative	Positive	m6Acluster A	NO	<=53	Alive	Gene.cluster B	-10.166	High m6Ascore
TCGA-A1-A0SG-01A	434	0	61	Tumor	TCGA-BRCA	Positive	Positive	Negative	m6Acluster B	NO	>53	Alive	Gene.cluster C	-14.5034	Low m6Ascore
TCGA-BH-A0H0-01A	461	0	69	Tumor	TCGA-BRCA	Positive	Positive	Negative	m6Acluster A	NO	>53	Alive	Gene.cluster A	-14.3077	Low m6Ascore
TCGA-D8-A1XR-01A	482	0	56	Tumor	TCGA-BRCA	Positive	Positive	Negative	m6Acluster C	NO	>53	Alive	Gene.cluster A	-20.2594	Low m6Ascore
TCGA-C8-A12P-01A	358	0	55	Tumor	TCGA-BRCA	Negative	Negative	Positive	m6Acluster B	NO	>53	Alive	Gene.cluster B	-8.49881	High m6Ascore
TCGA-LL-A50Y-01A	762	0	84	Tumor	TCGA-BRCA	unknown	unknown	unknown	m6Acluster A	unknown	>53	Alive	Gene.cluster C	-16.0177	Low m6Ascore
TCGA-AO-A03N-01B	2031	0	59	Tumor	TCGA-BRCA	Positive	Positive	Negative	m6Acluster B	NO	>53	Alive	Gene.cluster A	-10.4877	High m6Ascore
TCGA-E2-A1IU-01A	337	0	60	Tumor	TCGA-BRCA	Positive	Positive	Negative	m6Acluster C	NO	>53	Alive	Gene.cluster C	-16.0504	Low m6Ascore
TCGA-EW-A1IX-01A	1208	0	48	Tumor	TCGA-BRCA	Positive	Positive	Negative	m6Acluster C	NO	<=53	Alive	Gene.cluster C	-17.1973	Low m6Ascore
TCGA-A2-A0EV-01A	968	0	80	Tumor	TCGA-BRCA	Positive	Positive	Negative	m6Acluster C	NO	>53	Alive	Gene.cluster A	-17.5694	Low m6Ascore
TCGA-AC-A3W5-01A	504	0	65	Tumor	TCGA-BRCA	unknown	unknown	unknown	m6Acluster A	unknown	>53	Alive	Gene.cluster C	-11.3143	High m6Ascore
TCGA-AR-A2LN-01A	1161	0	65	Tumor	TCGA-BRCA	unknown	unknown	unknown	m6Acluster C	unknown	>53	Alive	Gene.cluster C	-15.359	Low m6Ascore
TCGA-E9-A1QZ-01A	755	0	61	Tumor	TCGA-BRCA	unknown	unknown	Negative	m6Acluster C	unknown	>53	Alive	Gene.cluster C	-15.5981	Low m6Ascore
TCGA-BH-A8FY-01A	295	1	87	Tumor	TCGA-BRCA	unknown	unknown	unknown	m6Acluster A	unknown	>53	Dead	Gene.cluster A	-15.027	Low m6Ascore
TCGA-AC-A6IX-06A	373	0	49	Tumor	TCGA-BRCA	unknown	unknown	unknown	m6Acluster B	unknown	<=53	Alive	Gene.cluster C	-15.6097	Low m6Ascore
TCGA-AR-A1AL-01A	2971	0	60	Tumor	TCGA-BRCA	Positive	Positive	Negative	m6Acluster C	NO	>53	Alive	Gene.cluster C	-15.5093	Low m6Ascore
TCGA-BH-A42T-01A	320	1	75	Tumor	TCGA-BRCA	unknown	unknown	unknown	m6Acluster B	unknown	>53	Dead	Gene.cluster A	-10.258	High m6Ascore
TCGA-BH-A0B9-01A	1572	0	44	Tumor	TCGA-BRCA	Negative	Negative	Negative	m6Acluster C	YES	<=53	Alive	Gene.cluster B	-6.47207	High m6Ascore
TCGA-AO-A0J8-01A	680	0	61	Tumor	TCGA-BRCA	Positive	Positive	Negative	m6Acluster B	NO	>53	Alive	Gene.cluster A	-14.638	Low m6Ascore
TCGA-BH-A2L8-01A	612	0	45	Tumor	TCGA-BRCA	unknown	unknown	unknown	m6Acluster A	unknown	<=53	Alive	Gene.cluster A	-13.7588	Low m6Ascore
TCGA-E9-A1N5-01A	1120	0	45	Tumor	TCGA-BRCA	Positive	Positive	Negative	m6Acluster A	NO	<=53	Alive	Gene.cluster A	-14.5177	Low m6Ascore
TCGA-A8-A075-01A	518	0	42	Tumor	TCGA-BRCA	Positive	Positive	Negative	m6Acluster B	NO	<=53	Alive	Gene.cluster A	-10.2926	High m6Ascore
TCGA-AN-A0FZ-01A	10	0	45	Tumor	TCGA-BRCA	Positive	Negative	unknown	m6Acluster B	NO	<=53	Alive	Gene.cluster A	-14.738	Low m6Ascore
TCGA-D8-A1XJ-01A	664	0	76	Tumor	TCGA-BRCA	Positive	Positive	Positive	m6Acluster B	NO	>53	Alive	Gene.cluster B	-9.3013	High m6Ascore
TCGA-E2-A15F-01A	658	0	64	Tumor	TCGA-BRCA	Positive	Positive	Negative	m6Acluster C	NO	>53	Alive	Gene.cluster A	-16.594	Low m6Ascore
TCGA-A2-A0EP-01A	3603	0	56	Tumor	TCGA-BRCA	unknown	unknown	unknown	m6Acluster A	unknown	>53	Alive	Gene.cluster C	-13.5612	Low m6Ascore
TCGA-BH-A18K-01A	2763	1	46	Tumor	TCGA-BRCA	Positive	Positive	Negative	m6Acluster A	NO	<=53	Dead	Gene.cluster A	-15.542	Low m6Ascore
TCGA-AR-A5QN-01A	1013	0	68	Tumor	TCGA-BRCA	unknown	unknown	unknown	m6Acluster C	unknown	>53	Alive	Gene.cluster C	-14.823	Low m6Ascore
TCGA-E9-A244-01A	21	0	54	Tumor	TCGA-BRCA	unknown	unknown	Negative	m6Acluster A	unknown	>53	Alive	Gene.cluster B	-6.87015	High m6Ascore
TCGA-A8-A0A2-01A	579	0	66	Tumor	TCGA-BRCA	Positive	Positive	Negative	m6Acluster A	NO	>53	Alive	Gene.cluster A	-15.3519	Low m6Ascore
TCGA-B6-A40C-01A	2164	0	51	Tumor	TCGA-BRCA	unknown	unknown	unknown	m6Acluster A	unknown	<=53	Alive	Gene.cluster A	-11.3668	High m6Ascore
TCGA-AR-A2LQ-01A	1233	0	59	Tumor	TCGA-BRCA	unknown	unknown	unknown	m6Acluster C	unknown	>53	Alive	Gene.cluster C	-15.419	Low m6Ascore
TCGA-EW-A1J6-01A	875	0	70	Tumor	TCGA-BRCA	Positive	Positive	Negative	m6Acluster C	NO	>53	Alive	Gene.cluster A	-11.6276	High m6Ascore
TCGA-EW-A1IZ-01A	554	0	53	Tumor	TCGA-BRCA	Positive	Positive	Negative	m6Acluster B	NO	<=53	Alive	Gene.cluster A	-13.591	Low m6Ascore
TCGA-AC-A2FG-01A	1853	0	79	Tumor	TCGA-BRCA	unknown	unknown	unknown	m6Acluster C	unknown	>53	Alive	Gene.cluster C	-17.3362	Low m6Ascore
TCGA-EW-A1P1-01A	1210	0	68	Tumor	TCGA-BRCA	Negative	Negative	Negative	m6Acluster C	YES	>53	Alive	Gene.cluster C	-12.5617	High m6Ascore
TCGA-A8-A0A9-01A	822	0	80	Tumor	TCGA-BRCA	Positive	Positive	Negative	m6Acluster A	NO	>53	Alive	Gene.cluster A	-14.3075	Low m6Ascore
TCGA-BH-A0DT-01A	2403	0	41	Tumor	TCGA-BRCA	Positive	Positive	Negative	m6Acluster C	NO	<=53	Alive	Gene.cluster C	-15.9442	Low m6Ascore
TCGA-A2-A0T2-01A	255	1	66	Tumor	TCGA-BRCA	Negative	Negative	Negative	m6Acluster B	YES	>53	Dead	Gene.cluster B	-6.539	High m6Ascore
TCGA-A7-A4SA-01A	454	0	40	Tumor	TCGA-BRCA	unknown	unknown	unknown	m6Acluster B	unknown	<=53	Alive	Gene.cluster A	-13.3609	Low m6Ascore
TCGA-D8-A27F-01A	488	0	40	Tumor	TCGA-BRCA	Negative	Negative	Negative	m6Acluster B	YES	<=53	Alive	Gene.cluster B	-7.01266	High m6Ascore
TCGA-D8-A146-01A	643	0	57	Tumor	TCGA-BRCA	Positive	Positive	Negative	m6Acluster C	NO	>53	Alive	Gene.cluster C	-20.3203	Low m6Ascore
TCGA-D8-A27E-01A	530	0	66	Tumor	TCGA-BRCA	Positive	Positive	Negative	m6Acluster C	NO	>53	Alive	Gene.cluster C	-23.014	Low m6Ascore
TCGA-C8-A138-01A	380	0	54	Tumor	TCGA-BRCA	Positive	Negative	Positive	m6Acluster B	NO	>53	Alive	Gene.cluster A	-10.7961	High m6Ascore
TCGA-E2-A14V-01A	1042	0	53	Tumor	TCGA-BRCA	Positive	Positive	Positive	m6Acluster B	NO	<=53	Alive	Gene.cluster B	-11.5046	High m6Ascore
TCGA-AC-A5EH-01A	511	0	76	Tumor	TCGA-BRCA	unknown	unknown	unknown	m6Acluster B	unknown	>53	Alive	Gene.cluster A	-14.2067	Low m6Ascore
TCGA-A2-A0YL-01A	1474	0	48	Tumor	TCGA-BRCA	Positive	Positive	Negative	m6Acluster C	NO	<=53	Alive	Gene.cluster C	-14.6719	Low m6Ascore
TCGA-E2-A1LK-01A	266	1	84	Tumor	TCGA-BRCA	Negative	Negative	Negative	m6Acluster A	YES	>53	Dead	Gene.cluster B	-7.45439	High m6Ascore
TCGA-D8-A13Z-01A	635	0	51	Tumor	TCGA-BRCA	Negative	Negative	Negative	m6Acluster B	YES	<=53	Alive	Gene.cluster B	-7.63868	High m6Ascore
TCGA-D8-A27V-01A	381	0	62	Tumor	TCGA-BRCA	Positive	Positive	Negative	m6Acluster B	NO	>53	Alive	Gene.cluster C	-16.2749	Low m6Ascore
TCGA-EW-A3U0-01A	532	0	61	Tumor	TCGA-BRCA	unknown	unknown	unknown	m6Acluster A	unknown	>53	Alive	Gene.cluster B	-9.98333	High m6Ascore
TCGA-A2-A4S2-01A	643	0	62	Tumor	TCGA-BRCA	unknown	unknown	unknown	m6Acluster B	unknown	>53	Alive	Gene.cluster C	-12.8238	High m6Ascore
TCGA-D8-A1XV-01A	461	0	84	Tumor	TCGA-BRCA	Positive	Positive	Negative	m6Acluster C	NO	>53	Alive	Gene.cluster A	-12.9685	High m6Ascore
TCGA-BH-A1F0-01A	785	1	80	Tumor	TCGA-BRCA	Negative	unknown	Negative	m6Acluster B	unknown	>53	Dead	Gene.cluster B	-10.4783	High m6Ascore
TCGA-AN-A0FT-01A	214	0	63	Tumor	TCGA-BRCA	Positive	Positive	Positive	m6Acluster A	NO	>53	Alive	Gene.cluster C	-9.32017	High m6Ascore
TCGA-E2-A15K-01A	275	0	58	Tumor	TCGA-BRCA	Positive	Positive	Negative	m6Acluster A	NO	>53	Alive	Gene.cluster A	-14.4794	Low m6Ascore
TCGA-BH-A0DL-01A	2381	0	64	Tumor	TCGA-BRCA	Positive	Negative	Negative	m6Acluster B	NO	>53	Alive	Gene.cluster B	-8.8003	High m6Ascore
TCGA-A2-A0EY-01A	1925	0	62	Tumor	TCGA-BRCA	Positive	Negative	Positive	m6Acluster A	NO	>53	Alive	Gene.cluster A	-11.5244	High m6Ascore
TCGA-B6-A0IG-01A	4456	1	50	Tumor	TCGA-BRCA	Positive	Positive	unknown	m6Acluster B	NO	<=53	Dead	Gene.cluster C	-12.0378	High m6Ascore
TCGA-BH-A0HI-01A	620	0	78	Tumor	TCGA-BRCA	Positive	Positive	Negative	m6Acluster C	NO	>53	Alive	Gene.cluster C	-21.6703	Low m6Ascore
TCGA-E2-A576-01A	1043	0	69	Tumor	TCGA-BRCA	unknown	unknown	unknown	m6Acluster B	unknown	>53	Alive	Gene.cluster A	-12.1331	High m6Ascore
TCGA-BH-A201-01A	856	0	64	Tumor	TCGA-BRCA	Positive	Positive	unknown	m6Acluster C	NO	>53	Alive	Gene.cluster C	-13.3531	Low m6Ascore
TCGA-D8-A1JB-01A	1688	0	54	Tumor	TCGA-BRCA	Positive	Positive	Positive	m6Acluster C	NO	>53	Alive	Gene.cluster C	-18.5348	Low m6Ascore
TCGA-A1-A0SN-01A	1196	0	50	Tumor	TCGA-BRCA	Positive	Positive	Positive	m6Acluster B	NO	<=53	Alive	Gene.cluster A	-13.5116	Low m6Ascore
TCGA-A8-A08A-01A	30	0	89	Tumor	TCGA-BRCA	Positive	Positive	Negative	m6Acluster C	NO	>53	Alive	Gene.cluster A	-14.9589	Low m6Ascore
TCGA-A2-A0YI-01A	1505	0	62	Tumor	TCGA-BRCA	Positive	Positive	Negative	m6Acluster C	NO	>53	Alive	Gene.cluster C	-18.12	Low m6Ascore
TCGA-AR-A1AN-01A	2920	0	46	Tumor	TCGA-BRCA	Positive	Positive	Negative	m6Acluster A	NO	<=53	Alive	Gene.cluster C	-15.0779	Low m6Ascore
TCGA-AR-A2LM-01A	1935	0	49	Tumor	TCGA-BRCA	unknown	unknown	unknown	m6Acluster B	unknown	<=53	Alive	Gene.cluster C	-16.8314	Low m6Ascore
TCGA-AR-A5QQ-01A	322	1	68	Tumor	TCGA-BRCA	unknown	unknown	unknown	m6Acluster A	unknown	>53	Dead	Gene.cluster B	-9.17533	High m6Ascore
TCGA-AR-A0TR-01A	160	1	68	Tumor	TCGA-BRCA	Positive	Positive	Negative	m6Acluster C	NO	>53	Dead	Gene.cluster A	-21.8009	Low m6Ascore
TCGA-GM-A3XG-01A	1330	0	46	Tumor	TCGA-BRCA	unknown	unknown	unknown	m6Acluster C	unknown	<=53	Alive	Gene.cluster C	-15.2327	Low m6Ascore
TCGA-BH-A1FC-01A	3472	1	78	Tumor	TCGA-BRCA	Negative	Negative	Negative	m6Acluster B	YES	>53	Dead	Gene.cluster B	-5.67815	High m6Ascore
TCGA-A2-A0D1-01A	1051	0	76	Tumor	TCGA-BRCA	Negative	Negative	Positive	m6Acluster B	NO	>53	Alive	Gene.cluster B	-9.77845	High m6Ascore
TCGA-EW-A1P7-01A	915	0	59	Tumor	TCGA-BRCA	Negative	Negative	Negative	m6Acluster C	YES	>53	Alive	Gene.cluster C	-12.3416	High m6Ascore
TCGA-AR-A1AP-01A	2856	0	80	Tumor	TCGA-BRCA	Positive	Positive	Negative	m6Acluster B	NO	>53	Alive	Gene.cluster A	-13.1906	High m6Ascore
TCGA-E2-A150-01A	1935	0	48	Tumor	TCGA-BRCA	Negative	Negative	Negative	m6Acluster C	YES	<=53	Alive	Gene.cluster B	-7.01566	High m6Ascore
TCGA-EW-A2FW-01A	672	0	52	Tumor	TCGA-BRCA	Positive	Positive	unknown	m6Acluster C	NO	<=53	Alive	Gene.cluster A	-11.3476	High m6Ascore
TCGA-AR-A1AV-01A	1864	0	68	Tumor	TCGA-BRCA	Positive	Positive	Negative	m6Acluster C	NO	>53	Alive	Gene.cluster A	-16.4583	Low m6Ascore
TCGA-A2-A0T1-01A	521	0	55	Tumor	TCGA-BRCA	Negative	Negative	Positive	m6Acluster A	NO	>53	Alive	Gene.cluster B	-9.76899	High m6Ascore
TCGA-AO-A0JF-01A	1980	0	68	Tumor	TCGA-BRCA	Positive	Positive	Negative	m6Acluster C	NO	>53	Alive	Gene.cluster C	-17.9288	Low m6Ascore
TCGA-OL-A6VR-01A	1220	0	48	Tumor	TCGA-BRCA	unknown	unknown	unknown	m6Acluster A	unknown	<=53	Alive	Gene.cluster A	-16.1787	Low m6Ascore
TCGA-BH-A0BG-01A	1871	0	73	Tumor	TCGA-BRCA	Negative	Negative	Negative	m6Acluster B	YES	>53	Alive	Gene.cluster B	-9.13395	High m6Ascore
TCGA-AO-A1KP-01A	2953	0	77	Tumor	TCGA-BRCA	Positive	Positive	Negative	m6Acluster A	NO	>53	Alive	Gene.cluster A	-12.9551	High m6Ascore
TCGA-LL-A441-01A	996	0	62	Tumor	TCGA-BRCA	unknown	unknown	unknown	m6Acluster A	unknown	>53	Alive	Gene.cluster B	-10.5701	High m6Ascore
TCGA-BH-A8FZ-01A	574	0	58	Tumor	TCGA-BRCA	unknown	unknown	unknown	m6Acluster A	unknown	>53	Alive	Gene.cluster C	-13.8205	Low m6Ascore
TCGA-E2-A1II-01A	1025	0	51	Tumor	TCGA-BRCA	Negative	Positive	Negative	m6Acluster B	NO	<=53	Alive	Gene.cluster B	-7.7396	High m6Ascore
TCGA-EW-A6SC-01A	952	0	60	Tumor	TCGA-BRCA	unknown	unknown	unknown	m6Acluster C	unknown	>53	Alive	Gene.cluster A	-17.1652	Low m6Ascore
TCGA-AN-A0XT-01A	10	0	54	Tumor	TCGA-BRCA	Positive	Negative	Negative	m6Acluster C	NO	>53	Alive	Gene.cluster A	-16.1852	Low m6Ascore
TCGA-BH-A0RX-01A	170	0	59	Tumor	TCGA-BRCA	Negative	Negative	Negative	m6Acluster B	YES	>53	Alive	Gene.cluster B	-9.55103	High m6Ascore
TCGA-A8-A08X-01A	1308	0	43	Tumor	TCGA-BRCA	Negative	Negative	Positive	m6Acluster B	NO	<=53	Alive	Gene.cluster B	-7.40569	High m6Ascore
TCGA-AO-A03V-01A	1351	0	41	Tumor	TCGA-BRCA	Positive	Positive	Negative	m6Acluster C	NO	<=53	Alive	Gene.cluster A	-15.0652	Low m6Ascore
TCGA-EW-A1PH-01A	607	0	52	Tumor	TCGA-BRCA	Negative	Negative	unknown	m6Acluster B	unknown	<=53	Alive	Gene.cluster B	-6.64108	High m6Ascore
TCGA-A2-A0ST-01A	3017	0	62	Tumor	TCGA-BRCA	Negative	Negative	Negative	m6Acluster B	YES	>53	Alive	Gene.cluster B	-10.9853	High m6Ascore
TCGA-BH-A0BC-01A	974	0	60	Tumor	TCGA-BRCA	Positive	Positive	Negative	m6Acluster C	NO	>53	Alive	Gene.cluster A	-14.7935	Low m6Ascore
TCGA-E9-A1NH-01A	576	0	71	Tumor	TCGA-BRCA	Positive	Positive	Negative	m6Acluster C	NO	>53	Alive	Gene.cluster C	-14.8653	Low m6Ascore
TCGA-B6-A0X5-01A	2097	1	61	Tumor	TCGA-BRCA	Positive	Positive	Negative	m6Acluster C	NO	>53	Dead	Gene.cluster A	-12.67	High m6Ascore
TCGA-AC-A4ZE-01A	890	0	63	Tumor	TCGA-BRCA	unknown	unknown	unknown	m6Acluster A	unknown	>53	Alive	Gene.cluster A	-14.2301	Low m6Ascore
TCGA-A8-A07Z-01A	1371	0	85	Tumor	TCGA-BRCA	Positive	Positive	Negative	m6Acluster C	NO	>53	Alive	Gene.cluster A	-14.8463	Low m6Ascore
TCGA-OL-A66P-01A	428	0	75	Tumor	TCGA-BRCA	unknown	unknown	unknown	m6Acluster C	unknown	>53	Alive	Gene.cluster C	-11.0082	High m6Ascore
TCGA-E2-A1LE-01A	879	1	71	Tumor	TCGA-BRCA	unknown	unknown	unknown	m6Acluster C	unknown	>53	Dead	Gene.cluster A	-10.5972	High m6Ascore
TCGA-C8-A8HR-01A	408	0	49	Tumor	TCGA-BRCA	unknown	unknown	unknown	m6Acluster B	unknown	<=53	Alive	Gene.cluster A	-12.5369	High m6Ascore
TCGA-A8-A09T-01A	579	0	68	Tumor	TCGA-BRCA	Positive	Positive	Negative	m6Acluster B	NO	>53	Alive	Gene.cluster A	-13.1729	High m6Ascore
TCGA-BH-A0HB-01A	806	0	55	Tumor	TCGA-BRCA	Positive	Positive	Negative	m6Acluster A	NO	>53	Alive	Gene.cluster A	-13.3995	Low m6Ascore
TCGA-A8-A08G-01A	607	0	41	Tumor	TCGA-BRCA	Positive	Positive	Positive	m6Acluster B	NO	<=53	Alive	Gene.cluster A	-11.7949	High m6Ascore
TCGA-A2-A0EQ-01A	2426	0	64	Tumor	TCGA-BRCA	Negative	Negative	Positive	m6Acluster A	NO	>53	Alive	Gene.cluster B	-9.38412	High m6Ascore
TCGA-AO-A1KO-01A	622	0	46	Tumor	TCGA-BRCA	Positive	Positive	Negative	m6Acluster C	NO	<=53	Alive	Gene.cluster C	-14.0205	Low m6Ascore
TCGA-BH-A0HW-01A	1561	0	62	Tumor	TCGA-BRCA	Positive	Negative	Negative	m6Acluster A	NO	>53	Alive	Gene.cluster A	-15.3356	Low m6Ascore
TCGA-OL-A66H-01A	812	0	74	Tumor	TCGA-BRCA	unknown	unknown	unknown	m6Acluster C	unknown	>53	Alive	Gene.cluster A	-19.662	Low m6Ascore
TCGA-A2-A0T0-01A	533	0	59	Tumor	TCGA-BRCA	Negative	Negative	Negative	m6Acluster B	YES	>53	Alive	Gene.cluster B	-7.1737	High m6Ascore
TCGA-AN-A04C-01A	54	0	51	Tumor	TCGA-BRCA	Negative	Negative	Positive	m6Acluster A	NO	<=53	Alive	Gene.cluster B	-8.96832	High m6Ascore
TCGA-E2-A573-01A	1062	0	48	Tumor	TCGA-BRCA	unknown	unknown	unknown	m6Acluster B	unknown	<=53	Alive	Gene.cluster B	-6.45501	High m6Ascore
TCGA-AN-A0XS-01A	10	0	63	Tumor	TCGA-BRCA	Negative	Positive	Negative	m6Acluster A	NO	>53	Alive	Gene.cluster A	-13.9813	Low m6Ascore
TCGA-D8-A3Z6-01A	563	0	56	Tumor	TCGA-BRCA	unknown	unknown	unknown	m6Acluster A	unknown	>53	Alive	Gene.cluster C	-14.8502	Low m6Ascore
TCGA-EW-A3E8-01B	1035	0	60	Tumor	TCGA-BRCA	unknown	unknown	unknown	m6Acluster C	unknown	>53	Alive	Gene.cluster C	-14.5437	Low m6Ascore
TCGA-C8-A137-01A	379	0	34	Tumor	TCGA-BRCA	Negative	Negative	Positive	m6Acluster B	NO	<=53	Alive	Gene.cluster B	-9.78868	High m6Ascore
TCGA-GM-A4E0-01A	2191	0	67	Tumor	TCGA-BRCA	unknown	unknown	unknown	m6Acluster A	unknown	>53	Alive	Gene.cluster C	-13.9952	Low m6Ascore
TCGA-E2-A1B4-01A	1004	1	74	Tumor	TCGA-BRCA	Positive	Positive	Negative	m6Acluster A	NO	>53	Dead	Gene.cluster C	-14.5941	Low m6Ascore
TCGA-EW-A2FS-01A	1604	0	41	Tumor	TCGA-BRCA	Positive	Negative	unknown	m6Acluster A	NO	<=53	Alive	Gene.cluster A	-12.4594	High m6Ascore
TCGA-S3-A6ZG-01A	562	0	71	Tumor	TCGA-BRCA	unknown	unknown	unknown	m6Acluster A	unknown	>53	Alive	Gene.cluster A	-14.9094	Low m6Ascore
TCGA-GM-A3XN-01A	2019	0	44	Tumor	TCGA-BRCA	unknown	unknown	unknown	m6Acluster A	unknown	<=53	Alive	Gene.cluster C	-13.1124	High m6Ascore
TCGA-EW-A1P8-01A	239	1	58	Tumor	TCGA-BRCA	Negative	Negative	Negative	m6Acluster C	YES	>53	Dead	Gene.cluster B	-6.82996	High m6Ascore
TCGA-E2-A156-01A	726	0	61	Tumor	TCGA-BRCA	Positive	Positive	Negative	m6Acluster A	NO	>53	Alive	Gene.cluster A	-15.496	Low m6Ascore
TCGA-AC-A8OP-01A	614	0	72	Tumor	TCGA-BRCA	unknown	unknown	unknown	m6Acluster A	unknown	>53	Alive	Gene.cluster C	-16.522	Low m6Ascore
TCGA-AN-A0FS-01A	210	0	55	Tumor	TCGA-BRCA	Positive	Negative	Negative	m6Acluster C	NO	>53	Alive	Gene.cluster C	-17.5588	Low m6Ascore
TCGA-B6-A0IM-01A	3873	1	75	Tumor	TCGA-BRCA	Positive	Positive	Negative	m6Acluster B	NO	>53	Dead	Gene.cluster A	-13.6877	Low m6Ascore
TCGA-E9-A3HO-01A	1158	0	49	Tumor	TCGA-BRCA	unknown	unknown	unknown	m6Acluster A	unknown	<=53	Alive	Gene.cluster A	-9.64102	High m6Ascore
TCGA-D8-A27K-01A	1461	0	47	Tumor	TCGA-BRCA	Positive	Positive	Negative	m6Acluster A	NO	<=53	Alive	Gene.cluster C	-16.0523	Low m6Ascore
TCGA-E9-A2JT-01A	288	0	63	Tumor	TCGA-BRCA	unknown	unknown	unknown	m6Acluster B	unknown	>53	Alive	Gene.cluster C	-14.8461	Low m6Ascore
TCGA-GM-A2DK-01A	2645	0	58	Tumor	TCGA-BRCA	Positive	Negative	unknown	m6Acluster B	NO	>53	Alive	Gene.cluster C	-14.489	Low m6Ascore
TCGA-AR-A1AK-01A	3159	0	70	Tumor	TCGA-BRCA	Positive	Positive	Negative	m6Acluster B	NO	>53	Alive	Gene.cluster A	-15.2416	Low m6Ascore
TCGA-E2-A15R-01A	1732	0	64	Tumor	TCGA-BRCA	Positive	Positive	Negative	m6Acluster A	NO	>53	Alive	Gene.cluster A	-17.0928	Low m6Ascore
TCGA-BH-A18Q-01A	1692	1	56	Tumor	TCGA-BRCA	Negative	Negative	Negative	m6Acluster C	YES	>53	Dead	Gene.cluster B	-10.5816	High m6Ascore
TCGA-E2-A153-01A	707	0	51	Tumor	TCGA-BRCA	Positive	Positive	Negative	m6Acluster C	NO	<=53	Alive	Gene.cluster C	-13.9605	Low m6Ascore
TCGA-BH-A0BT-01A	2365	0	56	Tumor	TCGA-BRCA	Positive	Positive	Negative	m6Acluster A	NO	>53	Alive	Gene.cluster C	-12.9707	High m6Ascore
TCGA-E9-A54Y-01A	725	0	63	Tumor	TCGA-BRCA	unknown	unknown	unknown	m6Acluster B	unknown	>53	Alive	Gene.cluster A	-10.5879	High m6Ascore
TCGA-E2-A14Q-01A	1163	0	50	Tumor	TCGA-BRCA	Positive	Positive	Negative	m6Acluster C	NO	<=53	Alive	Gene.cluster C	-15.1799	Low m6Ascore
TCGA-BH-A0HN-01A	516	0	67	Tumor	TCGA-BRCA	Positive	Positive	Negative	m6Acluster A	NO	>53	Alive	Gene.cluster C	-19.4131	Low m6Ascore
TCGA-E2-A1IK-01A	1800	0	71	Tumor	TCGA-BRCA	Positive	Positive	Negative	m6Acluster C	NO	>53	Alive	Gene.cluster A	-17.554	Low m6Ascore
TCGA-E2-A10C-01A	1220	0	54	Tumor	TCGA-BRCA	Positive	Positive	Negative	m6Acluster A	NO	>53	Alive	Gene.cluster A	-11.2561	High m6Ascore
TCGA-A8-A095-01A	1277	0	45	Tumor	TCGA-BRCA	Positive	Positive	Negative	m6Acluster C	NO	<=53	Alive	Gene.cluster A	-13.5217	Low m6Ascore
TCGA-A7-A0DB-01A	1007	0	56	Tumor	TCGA-BRCA	Positive	Positive	Negative	m6Acluster A	NO	>53	Alive	Gene.cluster C	-14.8234	Low m6Ascore
TCGA-BH-A18J-01A	612	1	56	Tumor	TCGA-BRCA	Positive	Positive	Negative	m6Acluster B	NO	>53	Dead	Gene.cluster A	-11.8118	High m6Ascore
TCGA-BH-A28O-01A	1120	0	50	Tumor	TCGA-BRCA	unknown	unknown	unknown	m6Acluster C	unknown	<=53	Alive	Gene.cluster C	-15.0018	Low m6Ascore
TCGA-AC-A3TN-01A	456	0	75	Tumor	TCGA-BRCA	unknown	unknown	unknown	m6Acluster A	unknown	>53	Alive	Gene.cluster C	-15.2072	Low m6Ascore
TCGA-A7-A13E-01A	614	1	62	Tumor	TCGA-BRCA	Positive	Negative	Negative	m6Acluster B	NO	>53	Dead	Gene.cluster B	-6.5212	High m6Ascore
TCGA-BH-A0W5-01A	1288	0	77	Tumor	TCGA-BRCA	Positive	Positive	Negative	m6Acluster C	NO	>53	Alive	Gene.cluster C	-14.6682	Low m6Ascore
TCGA-GM-A2DD-01A	2282	0	53	Tumor	TCGA-BRCA	Negative	Negative	unknown	m6Acluster A	unknown	<=53	Alive	Gene.cluster C	-12.1195	High m6Ascore
TCGA-AN-A0XV-01A	162	0	67	Tumor	TCGA-BRCA	Positive	Positive	Negative	m6Acluster C	NO	>53	Alive	Gene.cluster C	-16.1543	Low m6Ascore
TCGA-E2-A1IL-01A	118	0	78	Tumor	TCGA-BRCA	Positive	Positive	Negative	m6Acluster C	NO	>53	Alive	Gene.cluster C	-18.1454	Low m6Ascore
TCGA-EW-A2FR-01A	1673	0	59	Tumor	TCGA-BRCA	unknown	unknown	unknown	m6Acluster C	unknown	>53	Alive	Gene.cluster A	-10.5777	High m6Ascore
TCGA-3C-AAAU-01A	4047	0	55	Tumor	TCGA-BRCA	unknown	unknown	unknown	m6Acluster C	unknown	>53	Alive	Gene.cluster A	-18.9186	Low m6Ascore
TCGA-AR-A24W-01A	1550	0	55	Tumor	TCGA-BRCA	unknown	unknown	unknown	m6Acluster C	unknown	>53	Alive	Gene.cluster C	-15.6957	Low m6Ascore
TCGA-OL-A5RZ-01A	679	0	57	Tumor	TCGA-BRCA	unknown	unknown	unknown	m6Acluster A	unknown	>53	Alive	Gene.cluster B	-8.59511	High m6Ascore
TCGA-E9-A1RB-01A	976	1	40	Tumor	TCGA-BRCA	unknown	unknown	Negative	m6Acluster A	unknown	<=53	Dead	Gene.cluster B	-10.0121	High m6Ascore
TCGA-AN-A0AJ-01A	303	0	79	Tumor	TCGA-BRCA	Positive	Positive	Positive	m6Acluster B	NO	>53	Alive	Gene.cluster B	-10.4994	High m6Ascore
TCGA-AR-A1AT-01A	1272	1	62	Tumor	TCGA-BRCA	Positive	Positive	Positive	m6Acluster B	NO	>53	Dead	Gene.cluster B	-9.77567	High m6Ascore
TCGA-A8-A09Q-01A	761	0	83	Tumor	TCGA-BRCA	Positive	Positive	Negative	m6Acluster A	NO	>53	Alive	Gene.cluster A	-14.03	Low m6Ascore
TCGA-AN-A0XL-01A	163	0	61	Tumor	TCGA-BRCA	Positive	Positive	Negative	m6Acluster A	NO	>53	Alive	Gene.cluster C	-16.6519	Low m6Ascore
TCGA-E9-A1RC-01A	1224	0	56	Tumor	TCGA-BRCA	unknown	unknown	Negative	m6Acluster A	unknown	>53	Alive	Gene.cluster A	-12.2971	High m6Ascore
TCGA-D8-A27I-01A	439	0	58	Tumor	TCGA-BRCA	Positive	Positive	Negative	m6Acluster C	NO	>53	Alive	Gene.cluster C	-15.2286	Low m6Ascore
TCGA-A2-A04Y-01A	1099	0	53	Tumor	TCGA-BRCA	Positive	Positive	Negative	m6Acluster B	NO	<=53	Alive	Gene.cluster A	-11.7427	High m6Ascore
TCGA-PE-A5DC-01A	1430	1	72	Tumor	TCGA-BRCA	unknown	unknown	unknown	m6Acluster A	unknown	>53	Dead	Gene.cluster A	-11.7639	High m6Ascore
TCGA-OL-A5D8-01A	973	0	40	Tumor	TCGA-BRCA	unknown	unknown	unknown	m6Acluster A	unknown	<=53	Alive	Gene.cluster A	-12.9328	High m6Ascore
TCGA-A7-A26E-01A	954	0	71	Tumor	TCGA-BRCA	Positive	Positive	Negative	m6Acluster B	NO	>53	Alive	Gene.cluster C	-14.416	Low m6Ascore
TCGA-AN-A0FL-01A	231	0	62	Tumor	TCGA-BRCA	Negative	Negative	Negative	m6Acluster B	YES	>53	Alive	Gene.cluster B	-8.17665	High m6Ascore
TCGA-A8-A0A1-01A	365	0	84	Tumor	TCGA-BRCA	Positive	Positive	Negative	m6Acluster B	NO	>53	Alive	Gene.cluster A	-16.8579	Low m6Ascore
TCGA-AN-A0FN-01A	218	0	61	Tumor	TCGA-BRCA	Positive	Positive	Negative	m6Acluster C	NO	>53	Alive	Gene.cluster C	-17.1846	Low m6Ascore
TCGA-D8-A1J9-01A	532	0	48	Tumor	TCGA-BRCA	Positive	Negative	Positive	m6Acluster C	NO	<=53	Alive	Gene.cluster A	-13.756	Low m6Ascore
TCGA-BH-A1EO-01A	2798	1	68	Tumor	TCGA-BRCA	Positive	Positive	Negative	m6Acluster B	NO	>53	Dead	Gene.cluster C	-15.4941	Low m6Ascore
TCGA-B6-A0I2-01A	4361	0	45	Tumor	TCGA-BRCA	unknown	unknown	Negative	m6Acluster B	unknown	<=53	Alive	Gene.cluster B	-4.95664	High m6Ascore
TCGA-E9-A5UP-01A	803	0	63	Tumor	TCGA-BRCA	unknown	unknown	unknown	m6Acluster A	unknown	>53	Alive	Gene.cluster A	-11.5876	High m6Ascore
TCGA-A2-A0T5-01A	531	0	39	Tumor	TCGA-BRCA	Positive	Positive	Negative	m6Acluster A	NO	<=53	Alive	Gene.cluster A	-12.2427	High m6Ascore
TCGA-A7-A0DA-01A	1085	0	62	Tumor	TCGA-BRCA	Negative	Negative	Negative	m6Acluster B	YES	>53	Alive	Gene.cluster B	-7.76577	High m6Ascore
TCGA-BH-A5J0-01A	715	0	63	Tumor	TCGA-BRCA	unknown	unknown	unknown	m6Acluster C	unknown	>53	Alive	Gene.cluster A	-13.466	Low m6Ascore
TCGA-A2-A0CY-01A	1673	0	63	Tumor	TCGA-BRCA	Positive	Positive	Negative	m6Acluster A	NO	>53	Alive	Gene.cluster B	-6.68156	High m6Ascore
TCGA-E9-A245-01A	26	1	47	Tumor	TCGA-BRCA	unknown	unknown	Negative	m6Acluster C	unknown	<=53	Dead	Gene.cluster A	-21.3197	Low m6Ascore
TCGA-GM-A3NW-01A	3361	0	63	Tumor	TCGA-BRCA	unknown	unknown	unknown	m6Acluster A	unknown	>53	Alive	Gene.cluster C	-14.382	Low m6Ascore
TCGA-A1-A0SB-01A	259	0	70	Tumor	TCGA-BRCA	Positive	Negative	Negative	m6Acluster C	NO	>53	Alive	Gene.cluster C	-10.8956	High m6Ascore
TCGA-OL-A66N-01A	792	0	59	Tumor	TCGA-BRCA	unknown	unknown	unknown	m6Acluster A	unknown	>53	Alive	Gene.cluster C	-13.3686	Low m6Ascore
TCGA-A2-A0CQ-01A	2695	0	62	Tumor	TCGA-BRCA	Positive	Positive	Negative	m6Acluster A	NO	>53	Alive	Gene.cluster A	-13.8685	Low m6Ascore
TCGA-C8-A1HG-01A	345	0	50	Tumor	TCGA-BRCA	Positive	Positive	Negative	m6Acluster B	NO	<=53	Alive	Gene.cluster A	-11.7834	High m6Ascore
TCGA-AC-A2BK-01A	2222	0	78	Tumor	TCGA-BRCA	unknown	unknown	unknown	m6Acluster B	unknown	>53	Alive	Gene.cluster B	-8.14112	High m6Ascore
TCGA-A8-A08J-01A	1127	1	52	Tumor	TCGA-BRCA	Positive	Negative	Negative	m6Acluster C	NO	<=53	Dead	Gene.cluster A	-12.3326	High m6Ascore
TCGA-A8-A09V-01A	457	0	51	Tumor	TCGA-BRCA	Positive	Positive	Negative	m6Acluster C	NO	<=53	Alive	Gene.cluster A	-16.9837	Low m6Ascore
TCGA-A2-A0T3-01A	1516	0	37	Tumor	TCGA-BRCA	Positive	Positive	Negative	m6Acluster C	NO	<=53	Alive	Gene.cluster A	-17.9943	Low m6Ascore
TCGA-C8-A1HK-01A	366	0	53	Tumor	TCGA-BRCA	Negative	Negative	Positive	m6Acluster B	NO	<=53	Alive	Gene.cluster B	-9.47495	High m6Ascore
TCGA-AN-A04A-01A	90	0	36	Tumor	TCGA-BRCA	Positive	Positive	Negative	m6Acluster B	NO	<=53	Alive	Gene.cluster A	-11.2242	High m6Ascore
TCGA-E9-A1RG-01A	647	0	62	Tumor	TCGA-BRCA	unknown	unknown	Negative	m6Acluster A	unknown	>53	Alive	Gene.cluster A	-10.5848	High m6Ascore
TCGA-JL-A3YW-01A	360	0	49	Tumor	TCGA-BRCA	unknown	unknown	unknown	m6Acluster A	unknown	<=53	Alive	Gene.cluster C	-9.77399	High m6Ascore
TCGA-E2-A154-01A	591	0	68	Tumor	TCGA-BRCA	Positive	Positive	Negative	m6Acluster A	NO	>53	Alive	Gene.cluster A	-12.1024	High m6Ascore
TCGA-A2-A04U-01A	2654	0	47	Tumor	TCGA-BRCA	Negative	Negative	Negative	m6Acluster A	YES	<=53	Alive	Gene.cluster B	-5.97619	High m6Ascore
TCGA-BH-A0EE-01A	943	0	68	Tumor	TCGA-BRCA	Negative	Negative	Positive	m6Acluster B	NO	>53	Alive	Gene.cluster B	-8.87684	High m6Ascore
TCGA-BH-A0H5-01A	1620	0	45	Tumor	TCGA-BRCA	Positive	Positive	Negative	m6Acluster C	NO	<=53	Alive	Gene.cluster C	-15.3972	Low m6Ascore
TCGA-EW-A1IW-01A	371	0	80	Tumor	TCGA-BRCA	Positive	Positive	Positive	m6Acluster B	NO	>53	Alive	Gene.cluster A	-12.469	High m6Ascore
TCGA-AO-A0J4-01A	1587	0	41	Tumor	TCGA-BRCA	Negative	Negative	Negative	m6Acluster B	YES	<=53	Alive	Gene.cluster B	-7.12113	High m6Ascore
TCGA-A7-A3J1-01A	343	0	63	Tumor	TCGA-BRCA	unknown	unknown	unknown	m6Acluster A	unknown	>53	Alive	Gene.cluster C	-16.7899	Low m6Ascore
TCGA-E9-A243-01A	612	0	52	Tumor	TCGA-BRCA	unknown	unknown	Negative	m6Acluster B	unknown	<=53	Alive	Gene.cluster B	-9.31734	High m6Ascore
TCGA-C8-A134-01A	383	0	52	Tumor	TCGA-BRCA	Negative	Negative	Negative	m6Acluster B	YES	<=53	Alive	Gene.cluster B	-7.38823	High m6Ascore
TCGA-D8-A1Y1-01A	302	1	80	Tumor	TCGA-BRCA	Positive	Positive	Negative	m6Acluster A	NO	>53	Dead	Gene.cluster A	-11.9626	High m6Ascore
TCGA-AO-A12A-01A	3112	0	47	Tumor	TCGA-BRCA	Positive	Positive	Negative	m6Acluster C	NO	<=53	Alive	Gene.cluster C	-14.5413	Low m6Ascore
TCGA-E2-A108-01A	837	0	64	Tumor	TCGA-BRCA	Positive	Positive	Negative	m6Acluster C	NO	>53	Alive	Gene.cluster C	-13.7315	Low m6Ascore
TCGA-BH-A0E1-01A	477	0	52	Tumor	TCGA-BRCA	Positive	Positive	Negative	m6Acluster C	NO	<=53	Alive	Gene.cluster A	-20.8491	Low m6Ascore
TCGA-E2-A14U-01A	1318	0	74	Tumor	TCGA-BRCA	unknown	unknown	unknown	m6Acluster C	unknown	>53	Alive	Gene.cluster C	-16.014	Low m6Ascore
TCGA-BH-A0HL-01A	72	0	56	Tumor	TCGA-BRCA	Positive	Positive	Negative	m6Acluster A	NO	>53	Alive	Gene.cluster A	-14.7255	Low m6Ascore
TCGA-E9-A229-01A	1148	0	37	Tumor	TCGA-BRCA	unknown	unknown	Negative	m6Acluster B	unknown	<=53	Alive	Gene.cluster A	-16.4534	Low m6Ascore
TCGA-A8-A08T-01A	3409	1	64	Tumor	TCGA-BRCA	Positive	Positive	Negative	m6Acluster A	NO	>53	Dead	Gene.cluster A	-13.7617	Low m6Ascore
TCGA-E9-A1RF-01A	200	0	68	Tumor	TCGA-BRCA	unknown	unknown	Negative	m6Acluster B	unknown	>53	Alive	Gene.cluster A	-12.8874	High m6Ascore
TCGA-A2-A04T-01A	2246	0	62	Tumor	TCGA-BRCA	Negative	Negative	Negative	m6Acluster C	YES	>53	Alive	Gene.cluster B	-6.2744	High m6Ascore
TCGA-E2-A15P-01A	595	0	61	Tumor	TCGA-BRCA	Positive	Positive	Negative	m6Acluster C	NO	>53	Alive	Gene.cluster C	-16.4736	Low m6Ascore
TCGA-C8-A3M8-01A	394	0	68	Tumor	TCGA-BRCA	unknown	unknown	unknown	m6Acluster C	unknown	>53	Alive	Gene.cluster A	-12.6993	High m6Ascore
TCGA-LL-A5YO-01A	440	0	50	Tumor	TCGA-BRCA	unknown	unknown	unknown	m6Acluster B	unknown	<=53	Alive	Gene.cluster B	-9.62468	High m6Ascore
TCGA-OL-A66L-01A	1301	0	71	Tumor	TCGA-BRCA	unknown	unknown	unknown	m6Acluster A	unknown	>53	Alive	Gene.cluster C	-14.6101	Low m6Ascore
TCGA-OL-A66K-01A	1275	1	72	Tumor	TCGA-BRCA	unknown	unknown	unknown	m6Acluster C	unknown	>53	Dead	Gene.cluster C	-14.2454	Low m6Ascore
TCGA-E2-A1LG-01A	1523	0	50	Tumor	TCGA-BRCA	Negative	Negative	Negative	m6Acluster A	YES	<=53	Alive	Gene.cluster B	-7.4825	High m6Ascore
TCGA-E2-A1LS-01A	1604	0	46	Tumor	TCGA-BRCA	Negative	Negative	Negative	m6Acluster C	YES	<=53	Alive	Gene.cluster B	-5.62826	High m6Ascore
TCGA-A7-A426-01A	364	0	50	Tumor	TCGA-BRCA	unknown	unknown	unknown	m6Acluster A	unknown	<=53	Alive	Gene.cluster C	-15.0613	Low m6Ascore
TCGA-BH-A0B7-01A	2559	0	42	Tumor	TCGA-BRCA	Positive	Positive	Positive	m6Acluster B	NO	<=53	Alive	Gene.cluster C	-13.8637	Low m6Ascore
TCGA-AC-A2FO-01A	2255	0	65	Tumor	TCGA-BRCA	unknown	unknown	unknown	m6Acluster B	unknown	>53	Alive	Gene.cluster C	-17.6361	Low m6Ascore
TCGA-D8-A27L-01A	499	0	49	Tumor	TCGA-BRCA	Positive	Positive	Negative	m6Acluster B	NO	<=53	Alive	Gene.cluster C	-16.4357	Low m6Ascore
TCGA-AC-A2FF-01A	2759	0	40	Tumor	TCGA-BRCA	unknown	unknown	unknown	m6Acluster C	unknown	<=53	Alive	Gene.cluster C	-15.2823	Low m6Ascore
TCGA-GM-A2D9-01A	1812	1	69	Tumor	TCGA-BRCA	Positive	Positive	unknown	m6Acluster B	NO	>53	Dead	Gene.cluster C	-15.5846	Low m6Ascore
TCGA-A2-A0D3-01A	1873	0	42	Tumor	TCGA-BRCA	Positive	Positive	Negative	m6Acluster A	NO	<=53	Alive	Gene.cluster C	-13.6558	Low m6Ascore
TCGA-A2-A0EO-01A	2442	0	54	Tumor	TCGA-BRCA	Positive	Positive	Negative	m6Acluster B	NO	>53	Alive	Gene.cluster C	-15.9401	Low m6Ascore
TCGA-A2-A0T7-01A	631	0	51	Tumor	TCGA-BRCA	Positive	Positive	Negative	m6Acluster B	NO	<=53	Alive	Gene.cluster C	-13.6367	Low m6Ascore
TCGA-OL-A6VO-01A	858	0	43	Tumor	TCGA-BRCA	unknown	unknown	unknown	m6Acluster B	unknown	<=53	Alive	Gene.cluster B	-5.42264	High m6Ascore
TCGA-BH-A0EI-01A	1926	0	51	Tumor	TCGA-BRCA	Positive	Positive	Negative	m6Acluster C	NO	<=53	Alive	Gene.cluster A	-16.071	Low m6Ascore
TCGA-A8-A092-01A	942	0	48	Tumor	TCGA-BRCA	Positive	Positive	Negative	m6Acluster B	NO	<=53	Alive	Gene.cluster B	-10.8237	High m6Ascore
TCGA-BH-A0BA-01A	1132	0	51	Tumor	TCGA-BRCA	Positive	Positive	Negative	m6Acluster A	NO	<=53	Alive	Gene.cluster C	-14.7906	Low m6Ascore
TCGA-EW-A1OX-01A	911	0	43	Tumor	TCGA-BRCA	Positive	Positive	Negative	m6Acluster B	NO	<=53	Alive	Gene.cluster A	-12.7931	High m6Ascore
TCGA-A2-A0CR-01A	3283	0	54	Tumor	TCGA-BRCA	unknown	unknown	unknown	m6Acluster C	unknown	>53	Alive	Gene.cluster C	-14.8135	Low m6Ascore
TCGA-D8-A1JD-01A	552	0	41	Tumor	TCGA-BRCA	Positive	Positive	Negative	m6Acluster C	NO	<=53	Alive	Gene.cluster A	-14.5134	Low m6Ascore
TCGA-C8-A26X-01A	376	0	58	Tumor	TCGA-BRCA	Negative	Negative	Negative	m6Acluster C	YES	>53	Alive	Gene.cluster B	-8.87879	High m6Ascore
TCGA-A1-A0SE-01A	1321	0	56	Tumor	TCGA-BRCA	Positive	Positive	Negative	m6Acluster C	NO	>53	Alive	Gene.cluster A	-14.5528	Low m6Ascore
TCGA-A7-A4SF-01A	545	0	54	Tumor	TCGA-BRCA	unknown	unknown	unknown	m6Acluster A	unknown	>53	Alive	Gene.cluster A	-9.99605	High m6Ascore
TCGA-OL-A66O-01A	528	0	39	Tumor	TCGA-BRCA	unknown	unknown	unknown	m6Acluster A	unknown	<=53	Alive	Gene.cluster A	-13.4848	Low m6Ascore
TCGA-C8-A26W-01A	381	0	58	Tumor	TCGA-BRCA	Positive	Positive	Positive	m6Acluster B	NO	>53	Alive	Gene.cluster A	-13.971	Low m6Ascore
TCGA-AN-A0FW-01A	11	0	67	Tumor	TCGA-BRCA	Positive	unknown	Negative	m6Acluster B	NO	>53	Alive	Gene.cluster A	-19.7215	Low m6Ascore
TCGA-D8-A1JC-01A	480	0	59	Tumor	TCGA-BRCA	Positive	Positive	Negative	m6Acluster B	NO	>53	Alive	Gene.cluster A	-12.5427	High m6Ascore
TCGA-C8-A12V-01A	385	0	55	Tumor	TCGA-BRCA	Negative	Negative	Negative	m6Acluster B	YES	>53	Alive	Gene.cluster B	-9.65874	High m6Ascore
TCGA-A2-A04P-01A	548	1	36	Tumor	TCGA-BRCA	Negative	Negative	Negative	m6Acluster A	YES	<=53	Dead	Gene.cluster B	-6.99938	High m6Ascore
TCGA-BH-A0W3-01A	728	0	58	Tumor	TCGA-BRCA	Positive	Positive	Negative	m6Acluster A	NO	>53	Alive	Gene.cluster A	-15.7579	Low m6Ascore
TCGA-BH-A0B5-01A	2136	0	40	Tumor	TCGA-BRCA	Positive	Positive	Negative	m6Acluster A	NO	<=53	Alive	Gene.cluster A	-14.2557	Low m6Ascore
TCGA-S3-AA10-01A	586	0	65	Tumor	TCGA-BRCA	unknown	unknown	unknown	m6Acluster B	unknown	>53	Alive	Gene.cluster B	-6.65681	High m6Ascore
TCGA-BH-A0B0-01A	2477	0	56	Tumor	TCGA-BRCA	Positive	Positive	Negative	m6Acluster A	NO	>53	Alive	Gene.cluster C	-13.6967	Low m6Ascore
TCGA-E2-A574-01A	1179	0	44	Tumor	TCGA-BRCA	unknown	unknown	unknown	m6Acluster A	unknown	<=53	Alive	Gene.cluster B	-6.07564	High m6Ascore
TCGA-AN-A0XN-01A	10	0	68	Tumor	TCGA-BRCA	Negative	Positive	Negative	m6Acluster C	NO	>53	Alive	Gene.cluster A	-12.774	High m6Ascore
TCGA-AN-A0XW-01A	170	0	36	Tumor	TCGA-BRCA	Positive	Positive	Negative	m6Acluster C	NO	<=53	Alive	Gene.cluster A	-12.9564	High m6Ascore
TCGA-C8-A1HF-01A	332	0	48	Tumor	TCGA-BRCA	Negative	Positive	Positive	m6Acluster B	NO	<=53	Alive	Gene.cluster B	-8.62915	High m6Ascore
TCGA-AR-A2LO-01A	1198	0	46	Tumor	TCGA-BRCA	unknown	unknown	unknown	m6Acluster B	unknown	<=53	Alive	Gene.cluster A	-12.7377	High m6Ascore
TCGA-D8-A1XA-01A	839	0	64	Tumor	TCGA-BRCA	Positive	Positive	Negative	m6Acluster C	NO	>53	Alive	Gene.cluster A	-14.9563	Low m6Ascore
TCGA-BH-A0BL-01A	2278	0	35	Tumor	TCGA-BRCA	Negative	Negative	Negative	m6Acluster B	YES	<=53	Alive	Gene.cluster B	-9.66897	High m6Ascore
TCGA-EW-A1J2-01A	403	0	50	Tumor	TCGA-BRCA	Positive	Positive	Negative	m6Acluster B	NO	<=53	Alive	Gene.cluster C	-16.5986	Low m6Ascore
TCGA-BH-A0AZ-01A	1919	0	47	Tumor	TCGA-BRCA	Positive	Positive	Negative	m6Acluster C	NO	<=53	Alive	Gene.cluster C	-17.4093	Low m6Ascore
TCGA-E9-A227-01A	975	0	42	Tumor	TCGA-BRCA	Positive	Positive	Negative	m6Acluster C	NO	<=53	Alive	Gene.cluster C	-16.5678	Low m6Ascore
TCGA-A2-A0D2-01A	1027	0	45	Tumor	TCGA-BRCA	Negative	Negative	Negative	m6Acluster A	YES	<=53	Alive	Gene.cluster B	-8.259	High m6Ascore
TCGA-D8-A1XM-01A	538	0	57	Tumor	TCGA-BRCA	Positive	Positive	Negative	m6Acluster C	NO	>53	Alive	Gene.cluster A	-15.4574	Low m6Ascore
TCGA-D8-A1Y3-01A	430	0	61	Tumor	TCGA-BRCA	Positive	Positive	Negative	m6Acluster A	NO	>53	Alive	Gene.cluster B	-8.23522	High m6Ascore
TCGA-C8-A275-01A	1	0	56	Tumor	TCGA-BRCA	unknown	unknown	Positive	m6Acluster B	NO	>53	Alive	Gene.cluster B	-8.91994	High m6Ascore
TCGA-E2-A3DX-01A	1325	0	43	Tumor	TCGA-BRCA	unknown	unknown	unknown	m6Acluster C	unknown	<=53	Alive	Gene.cluster C	-16.2872	Low m6Ascore
TCGA-C8-A1HM-01A	375	0	74	Tumor	TCGA-BRCA	Positive	Positive	Negative	m6Acluster B	NO	>53	Alive	Gene.cluster B	-12.8951	High m6Ascore
TCGA-E2-A158-01A	450	0	43	Tumor	TCGA-BRCA	Negative	Negative	Negative	m6Acluster C	YES	<=53	Alive	Gene.cluster B	-6.62491	High m6Ascore
TCGA-AR-A0TP-01A	4275	0	43	Tumor	TCGA-BRCA	Positive	Negative	Negative	m6Acluster C	NO	<=53	Alive	Gene.cluster B	-8.85933	High m6Ascore
TCGA-A7-A26F-01B	738	0	55	Tumor	TCGA-BRCA	Negative	Negative	Negative	m6Acluster B	YES	>53	Alive	Gene.cluster B	-7.60896	High m6Ascore
TCGA-A2-A1FW-01A	528	0	62	Tumor	TCGA-BRCA	Positive	Negative	Negative	m6Acluster B	NO	>53	Alive	Gene.cluster A	-13.0855	High m6Ascore
TCGA-E2-A15A-06A	710	0	45	Tumor	TCGA-BRCA	unknown	unknown	unknown	m6Acluster B	unknown	<=53	Alive	Gene.cluster A	-13.0952	High m6Ascore
TCGA-BH-A0C7-01B	2767	0	48	Tumor	TCGA-BRCA	Positive	Negative	Positive	m6Acluster C	NO	<=53	Alive	Gene.cluster A	-14.9871	Low m6Ascore
TCGA-AR-A1AJ-01A	2383	0	83	Tumor	TCGA-BRCA	Positive	Negative	Negative	m6Acluster B	NO	>53	Alive	Gene.cluster B	-9.33764	High m6Ascore
TCGA-E9-A1R5-01A	92	0	63	Tumor	TCGA-BRCA	unknown	unknown	Negative	m6Acluster B	unknown	>53	Alive	Gene.cluster C	-12.6075	High m6Ascore
TCGA-A8-A09A-01A	304	0	40	Tumor	TCGA-BRCA	Positive	Positive	Negative	m6Acluster B	NO	<=53	Alive	Gene.cluster A	-14.4403	Low m6Ascore
TCGA-GM-A2DC-01A	2535	0	57	Tumor	TCGA-BRCA	Positive	Positive	unknown	m6Acluster A	NO	>53	Alive	Gene.cluster C	-14.6491	Low m6Ascore
TCGA-A2-A3KC-01A	1102	0	55	Tumor	TCGA-BRCA	unknown	unknown	unknown	m6Acluster B	unknown	>53	Alive	Gene.cluster C	-15.6732	Low m6Ascore
TCGA-AO-A0J9-01A	1613	0	61	Tumor	TCGA-BRCA	Positive	Positive	Negative	m6Acluster B	NO	>53	Alive	Gene.cluster C	-13.743	Low m6Ascore
TCGA-E2-A14Y-01A	2109	0	35	Tumor	TCGA-BRCA	Positive	Positive	Positive	m6Acluster A	NO	<=53	Alive	Gene.cluster B	-3.63208	High m6Ascore
TCGA-D8-A4Z1-01A	659	0	68	Tumor	TCGA-BRCA	unknown	unknown	unknown	m6Acluster C	unknown	>53	Alive	Gene.cluster C	-16.3343	Low m6Ascore
TCGA-3C-AALI-01A	4005	0	50	Tumor	TCGA-BRCA	unknown	unknown	unknown	m6Acluster A	unknown	<=53	Alive	Gene.cluster B	-9.30843	High m6Ascore
TCGA-E2-A159-01A	762	0	50	Tumor	TCGA-BRCA	Negative	Negative	Negative	m6Acluster B	YES	<=53	Alive	Gene.cluster B	-8.89074	High m6Ascore
TCGA-E2-A155-01A	640	0	58	Tumor	TCGA-BRCA	Positive	Negative	Negative	m6Acluster B	NO	>53	Alive	Gene.cluster A	-16.3645	Low m6Ascore
TCGA-A8-A082-01A	549	0	58	Tumor	TCGA-BRCA	Positive	Positive	Negative	m6Acluster C	NO	>53	Alive	Gene.cluster A	-12.5265	High m6Ascore
TCGA-E2-A14R-01A	1174	0	62	Tumor	TCGA-BRCA	Negative	Negative	Negative	m6Acluster B	YES	>53	Alive	Gene.cluster B	-5.08341	High m6Ascore
TCGA-D8-A141-01A	626	0	40	Tumor	TCGA-BRCA	Positive	Positive	Negative	m6Acluster A	NO	<=53	Alive	Gene.cluster C	-14.0322	Low m6Ascore
TCGA-BH-A204-01A	2534	1	80	Tumor	TCGA-BRCA	unknown	unknown	unknown	m6Acluster B	unknown	>53	Dead	Gene.cluster A	-15.3762	Low m6Ascore
TCGA-E2-A109-01A	1417	0	64	Tumor	TCGA-BRCA	Positive	Negative	Negative	m6Acluster A	NO	>53	Alive	Gene.cluster A	-11.9723	High m6Ascore
TCGA-C8-A1HJ-01A	5	0	53	Tumor	TCGA-BRCA	Negative	Negative	Negative	m6Acluster B	YES	<=53	Alive	Gene.cluster B	-5.66945	High m6Ascore
TCGA-BH-A0C1-01B	1411	1	61	Tumor	TCGA-BRCA	Positive	Positive	Negative	m6Acluster B	NO	>53	Dead	Gene.cluster A	-14.0823	Low m6Ascore
TCGA-D8-A1Y2-01A	433	0	71	Tumor	TCGA-BRCA	Positive	Positive	Negative	m6Acluster C	NO	>53	Alive	Gene.cluster A	-12.8394	High m6Ascore
TCGA-AR-A2LJ-01A	2632	0	40	Tumor	TCGA-BRCA	unknown	unknown	unknown	m6Acluster C	unknown	<=53	Alive	Gene.cluster C	-13.7347	Low m6Ascore
TCGA-AC-A2QH-01B	1005	0	58	Tumor	TCGA-BRCA	unknown	unknown	unknown	m6Acluster B	unknown	>53	Alive	Gene.cluster B	-7.10045	High m6Ascore
TCGA-A2-A0YK-01A	588	0	61	Tumor	TCGA-BRCA	Positive	Negative	Negative	m6Acluster C	NO	>53	Alive	Gene.cluster C	-15.5179	Low m6Ascore
TCGA-E9-A22H-01A	1232	0	42	Tumor	TCGA-BRCA	Positive	Positive	Negative	m6Acluster B	NO	<=53	Alive	Gene.cluster A	-15.7778	Low m6Ascore
TCGA-E2-A1L8-01A	2240	0	52	Tumor	TCGA-BRCA	Positive	Positive	Negative	m6Acluster B	NO	<=53	Alive	Gene.cluster C	-14.2377	Low m6Ascore
TCGA-BH-A0B8-01A	1569	0	64	Tumor	TCGA-BRCA	Positive	Positive	Negative	m6Acluster C	NO	>53	Alive	Gene.cluster A	-13.5174	Low m6Ascore
TCGA-BH-A18G-01A	149	0	81	Tumor	TCGA-BRCA	Negative	Negative	Negative	m6Acluster C	YES	>53	Alive	Gene.cluster B	-8.15038	High m6Ascore
TCGA-JL-A3YX-01A	352	0	46	Tumor	TCGA-BRCA	unknown	unknown	unknown	m6Acluster A	unknown	<=53	Alive	Gene.cluster A	-10.7149	High m6Ascore
TCGA-S3-AA17-01A	424	0	64	Tumor	TCGA-BRCA	unknown	unknown	unknown	m6Acluster A	unknown	>53	Alive	Gene.cluster A	-11.3086	High m6Ascore
TCGA-E2-A15M-01A	336	1	66	Tumor	TCGA-BRCA	Positive	Positive	Negative	m6Acluster B	NO	>53	Dead	Gene.cluster A	-14.6877	Low m6Ascore
TCGA-E2-A56Z-01A	252	0	69	Tumor	TCGA-BRCA	unknown	unknown	unknown	m6Acluster A	unknown	>53	Alive	Gene.cluster A	-13.2073	High m6Ascore
TCGA-A7-A0CH-01A	1079	0	79	Tumor	TCGA-BRCA	unknown	unknown	Negative	m6Acluster C	unknown	>53	Alive	Gene.cluster C	-17.6852	Low m6Ascore
TCGA-AR-A0TZ-01A	3262	1	43	Tumor	TCGA-BRCA	Positive	Positive	Negative	m6Acluster C	NO	<=53	Dead	Gene.cluster A	-16.1415	Low m6Ascore
TCGA-E2-A15I-01A	1692	0	44	Tumor	TCGA-BRCA	Positive	Positive	Negative	m6Acluster C	NO	<=53	Alive	Gene.cluster C	-19.128	Low m6Ascore
TCGA-BH-A0B4-01A	1191	0	65	Tumor	TCGA-BRCA	Positive	Positive	Positive	m6Acluster A	NO	>53	Alive	Gene.cluster A	-14.3387	Low m6Ascore
TCGA-E2-A15K-06A	275	0	58	Tumor	TCGA-BRCA	unknown	unknown	unknown	m6Acluster C	unknown	>53	Alive	Gene.cluster A	-15.2919	Low m6Ascore
TCGA-BH-A0WA-01A	701	0	82	Tumor	TCGA-BRCA	Negative	Negative	Negative	m6Acluster B	YES	>53	Alive	Gene.cluster B	-7.82251	High m6Ascore
TCGA-A2-A0ET-01A	1066	0	58	Tumor	TCGA-BRCA	Positive	Positive	Negative	m6Acluster C	NO	>53	Alive	Gene.cluster A	-18.473	Low m6Ascore
TCGA-OL-A5RW-01A	1106	0	40	Tumor	TCGA-BRCA	unknown	unknown	unknown	m6Acluster B	unknown	<=53	Alive	Gene.cluster B	-5.83829	High m6Ascore
TCGA-A7-A13D-01B	965	0	46	Tumor	TCGA-BRCA	Negative	Positive	Negative	m6Acluster B	NO	<=53	Alive	Gene.cluster B	-7.68258	High m6Ascore
TCGA-AN-A0FD-01A	196	0	71	Tumor	TCGA-BRCA	Positive	Positive	Positive	m6Acluster C	NO	>53	Alive	Gene.cluster A	-13.2278	High m6Ascore
TCGA-BH-A0H7-01A	702	0	65	Tumor	TCGA-BRCA	Positive	Positive	Negative	m6Acluster B	NO	>53	Alive	Gene.cluster A	-13.472	Low m6Ascore
TCGA-LL-A5YL-01A	519	0	64	Tumor	TCGA-BRCA	unknown	unknown	unknown	m6Acluster A	unknown	>53	Alive	Gene.cluster C	-13.0641	High m6Ascore
TCGA-A2-A0D0-01A	2048	0	60	Tumor	TCGA-BRCA	Negative	Negative	Negative	m6Acluster B	YES	>53	Alive	Gene.cluster B	-4.72851	High m6Ascore
TCGA-AO-A129-01A	3286	0	29	Tumor	TCGA-BRCA	Negative	Negative	Negative	m6Acluster C	YES	<=53	Alive	Gene.cluster B	-6.73139	High m6Ascore
TCGA-BH-A1EW-01A	1694	1	38	Tumor	TCGA-BRCA	Negative	Negative	Negative	m6Acluster B	YES	<=53	Dead	Gene.cluster A	-13.964	Low m6Ascore
TCGA-AO-A03M-01B	1866	0	29	Tumor	TCGA-BRCA	Positive	Positive	Negative	m6Acluster B	NO	<=53	Alive	Gene.cluster A	-13.9292	Low m6Ascore
TCGA-B6-A0RP-01A	3126	1	73	Tumor	TCGA-BRCA	Positive	Positive	Negative	m6Acluster A	NO	>53	Dead	Gene.cluster C	-17.7299	Low m6Ascore
TCGA-E2-A15T-01A	1563	0	65	Tumor	TCGA-BRCA	Positive	Positive	Negative	m6Acluster C	NO	>53	Alive	Gene.cluster A	-17.4774	Low m6Ascore
TCGA-A2-A4RW-01A	222	0	49	Tumor	TCGA-BRCA	unknown	unknown	unknown	m6Acluster C	unknown	<=53	Alive	Gene.cluster C	-12.8409	High m6Ascore
TCGA-A8-A08O-01A	943	0	45	Tumor	TCGA-BRCA	Positive	Positive	Negative	m6Acluster C	NO	<=53	Alive	Gene.cluster A	-17.2678	Low m6Ascore
TCGA-BH-A18I-01A	1093	0	53	Tumor	TCGA-BRCA	Positive	Positive	Negative	m6Acluster A	NO	<=53	Alive	Gene.cluster A	-15.0224	Low m6Ascore
TCGA-BH-A0BM-01A	1876	0	54	Tumor	TCGA-BRCA	Positive	Negative	Negative	m6Acluster C	NO	>53	Alive	Gene.cluster C	-19.1859	Low m6Ascore
TCGA-E2-A14N-01A	1434	0	37	Tumor	TCGA-BRCA	Negative	Negative	Negative	m6Acluster B	YES	<=53	Alive	Gene.cluster B	-5.99898	High m6Ascore
TCGA-5L-AAT0-01A	1477	0	42	Tumor	TCGA-BRCA	unknown	unknown	unknown	m6Acluster A	unknown	<=53	Alive	Gene.cluster C	-15.6573	Low m6Ascore
TCGA-BH-A6R9-01A	160	0	61	Tumor	TCGA-BRCA	unknown	unknown	unknown	m6Acluster C	unknown	>53	Alive	Gene.cluster C	-11.4148	High m6Ascore
TCGA-EW-A1PG-01A	1051	0	53	Tumor	TCGA-BRCA	Positive	Positive	Negative	m6Acluster C	NO	<=53	Alive	Gene.cluster C	-14.462	Low m6Ascore
TCGA-AN-A03Y-01A	10	0	66	Tumor	TCGA-BRCA	Positive	Positive	Negative	m6Acluster A	NO	>53	Alive	Gene.cluster A	-9.22004	High m6Ascore
TCGA-B6-A0RT-01A	2721	0	39	Tumor	TCGA-BRCA	Negative	Negative	Negative	m6Acluster B	YES	<=53	Alive	Gene.cluster B	-10.0206	High m6Ascore
TCGA-A7-A56D-01A	448	0	84	Tumor	TCGA-BRCA	unknown	unknown	unknown	m6Acluster C	unknown	>53	Alive	Gene.cluster A	-9.32153	High m6Ascore
TCGA-D8-A73W-01A	385	1	79	Tumor	TCGA-BRCA	unknown	unknown	unknown	m6Acluster B	unknown	>53	Dead	Gene.cluster C	-13.4228	Low m6Ascore
TCGA-AO-A0J5-01A	792	1	48	Tumor	TCGA-BRCA	Positive	Negative	Negative	m6Acluster C	NO	<=53	Dead	Gene.cluster A	-15.8452	Low m6Ascore
TCGA-A2-A1G6-01A	501	0	50	Tumor	TCGA-BRCA	Negative	Negative	Negative	m6Acluster C	YES	<=53	Alive	Gene.cluster C	-17.433	Low m6Ascore
TCGA-AC-A3OD-01B	451	0	68	Tumor	TCGA-BRCA	unknown	unknown	unknown	m6Acluster B	unknown	>53	Alive	Gene.cluster A	-13.0753	High m6Ascore
TCGA-A7-A0CJ-01A	931	0	57	Tumor	TCGA-BRCA	Positive	Positive	Negative	m6Acluster B	NO	>53	Alive	Gene.cluster A	-11.2283	High m6Ascore
TCGA-A8-A07U-01A	760	0	66	Tumor	TCGA-BRCA	Negative	Positive	Negative	m6Acluster B	NO	>53	Alive	Gene.cluster B	-8.12886	High m6Ascore
TCGA-D8-A1XS-01A	496	0	48	Tumor	TCGA-BRCA	Positive	Positive	Positive	m6Acluster A	NO	<=53	Alive	Gene.cluster A	-15.7722	Low m6Ascore
TCGA-B6-A0I8-01A	749	1	46	Tumor	TCGA-BRCA	unknown	unknown	unknown	m6Acluster A	unknown	<=53	Dead	Gene.cluster A	-13.9701	Low m6Ascore
TCGA-LL-A5YM-01A	394	0	88	Tumor	TCGA-BRCA	unknown	unknown	unknown	m6Acluster C	unknown	>53	Alive	Gene.cluster A	-15.9875	Low m6Ascore
TCGA-E2-A15E-01A	630	0	40	Tumor	TCGA-BRCA	Positive	Positive	Positive	m6Acluster C	NO	<=53	Alive	Gene.cluster C	-15.2276	Low m6Ascore
TCGA-D8-A27G-01A	409	0	75	Tumor	TCGA-BRCA	Positive	Positive	Negative	m6Acluster B	NO	>53	Alive	Gene.cluster A	-15.2382	Low m6Ascore
TCGA-BH-A1EX-01A	1508	1	67	Tumor	TCGA-BRCA	Positive	Positive	Negative	m6Acluster C	NO	>53	Dead	Gene.cluster C	-12.844	High m6Ascore
TCGA-A8-A076-01A	1642	0	66	Tumor	TCGA-BRCA	Positive	Positive	Positive	m6Acluster B	NO	>53	Alive	Gene.cluster A	-13.8967	Low m6Ascore
TCGA-EW-A1OV-01A	789	0	56	Tumor	TCGA-BRCA	Negative	Negative	Negative	m6Acluster B	YES	>53	Alive	Gene.cluster B	-12.0464	High m6Ascore
TCGA-B6-A0X7-01A	1781	1	62	Tumor	TCGA-BRCA	Positive	Positive	Negative	m6Acluster A	NO	>53	Dead	Gene.cluster C	-15.4845	Low m6Ascore
TCGA-B6-A0WT-01A	5739	0	61	Tumor	TCGA-BRCA	Positive	Positive	Negative	m6Acluster C	NO	>53	Alive	Gene.cluster A	-16.4872	Low m6Ascore
TCGA-A2-A4S3-01A	666	0	59	Tumor	TCGA-BRCA	unknown	unknown	unknown	m6Acluster B	unknown	>53	Alive	Gene.cluster B	-9.60839	High m6Ascore
TCGA-BH-A0BZ-01A	2255	0	59	Tumor	TCGA-BRCA	Positive	Positive	Negative	m6Acluster B	NO	>53	Alive	Gene.cluster A	-16.2733	Low m6Ascore
TCGA-OL-A5RU-01A	1219	0	63	Tumor	TCGA-BRCA	unknown	unknown	unknown	m6Acluster C	unknown	>53	Alive	Gene.cluster C	-17.4729	Low m6Ascore
TCGA-D8-A73U-01A	492	0	88	Tumor	TCGA-BRCA	unknown	unknown	unknown	m6Acluster A	unknown	>53	Alive	Gene.cluster C	-14.7371	Low m6Ascore
TCGA-A2-A0YT-01A	723	1	56	Tumor	TCGA-BRCA	Positive	Negative	Negative	m6Acluster B	NO	>53	Dead	Gene.cluster A	-11.3639	High m6Ascore
TCGA-A1-A0SK-01A	967	1	54	Tumor	TCGA-BRCA	Negative	Negative	Negative	m6Acluster B	YES	>53	Dead	Gene.cluster B	-7.7708	High m6Ascore
TCGA-E9-A295-01A	375	0	71	Tumor	TCGA-BRCA	unknown	unknown	unknown	m6Acluster A	unknown	>53	Alive	Gene.cluster A	-14.0553	Low m6Ascore
TCGA-AR-A1AR-01A	524	1	50	Tumor	TCGA-BRCA	Negative	Negative	Negative	m6Acluster B	YES	<=53	Dead	Gene.cluster B	-11.291	High m6Ascore
TCGA-D8-A1XY-01A	503	0	74	Tumor	TCGA-BRCA	Positive	Positive	Positive	m6Acluster B	NO	>53	Alive	Gene.cluster C	-14.9727	Low m6Ascore
TCGA-LL-A8F5-01A	596	0	61	Tumor	TCGA-BRCA	unknown	unknown	unknown	m6Acluster A	unknown	>53	Alive	Gene.cluster B	-6.17634	High m6Ascore
TCGA-E9-A1R6-01A	339	0	63	Tumor	TCGA-BRCA	unknown	unknown	Negative	m6Acluster A	unknown	>53	Alive	Gene.cluster A	-15.2624	Low m6Ascore
TCGA-BH-A1FL-01A	1673	1	69	Tumor	TCGA-BRCA	Positive	Positive	Negative	m6Acluster A	NO	>53	Dead	Gene.cluster A	-13.4707	Low m6Ascore
TCGA-E9-A1RE-01A	1419	0	74	Tumor	TCGA-BRCA	unknown	unknown	Negative	m6Acluster B	unknown	>53	Alive	Gene.cluster A	-16.668	Low m6Ascore
TCGA-D8-A1JN-01A	620	0	80	Tumor	TCGA-BRCA	Positive	Positive	Negative	m6Acluster C	NO	>53	Alive	Gene.cluster C	-13.942	Low m6Ascore
TCGA-D8-A145-01A	410	0	80	Tumor	TCGA-BRCA	Positive	Positive	Negative	m6Acluster C	NO	>53	Alive	Gene.cluster C	-17.9806	Low m6Ascore
TCGA-B6-A0IK-01A	571	1	63	Tumor	TCGA-BRCA	Negative	Negative	Negative	m6Acluster B	YES	>53	Dead	Gene.cluster B	-14.7037	Low m6Ascore
TCGA-C8-A1HE-01A	375	0	59	Tumor	TCGA-BRCA	Positive	Positive	Negative	m6Acluster C	NO	>53	Alive	Gene.cluster C	-16.1029	Low m6Ascore
TCGA-A8-A0AB-01A	518	0	54	Tumor	TCGA-BRCA	Positive	Positive	Negative	m6Acluster A	NO	>53	Alive	Gene.cluster A	-14.4429	Low m6Ascore
TCGA-EW-A1J3-01A	504	0	61	Tumor	TCGA-BRCA	Positive	Positive	Positive	m6Acluster C	NO	>53	Alive	Gene.cluster A	-15.3428	Low m6Ascore
TCGA-GI-A2C8-01A	225	0	63	Tumor	TCGA-BRCA	unknown	unknown	unknown	m6Acluster C	unknown	>53	Alive	Gene.cluster C	-14.9931	Low m6Ascore
TCGA-A2-A0YJ-01A	566	0	39	Tumor	TCGA-BRCA	Positive	Negative	Negative	m6Acluster B	NO	<=53	Alive	Gene.cluster B	-4.97483	High m6Ascore
TCGA-A8-A0A7-01A	30	0	57	Tumor	TCGA-BRCA	Negative	Negative	Positive	m6Acluster B	NO	>53	Alive	Gene.cluster A	-12.4899	High m6Ascore
TCGA-A8-A08L-01A	30	1	89	Tumor	TCGA-BRCA	Positive	Negative	Negative	m6Acluster C	NO	>53	Dead	Gene.cluster B	-9.41117	High m6Ascore
TCGA-BH-A0H6-01A	747	0	82	Tumor	TCGA-BRCA	Positive	Positive	Negative	m6Acluster A	NO	>53	Alive	Gene.cluster A	-14.8958	Low m6Ascore
TCGA-D8-A1XL-01A	606	0	34	Tumor	TCGA-BRCA	Positive	Positive	Negative	m6Acluster A	NO	<=53	Alive	Gene.cluster A	-11.1589	High m6Ascore
TCGA-E2-A10B-01A	1141	0	67	Tumor	TCGA-BRCA	Positive	Positive	Negative	m6Acluster B	NO	>53	Alive	Gene.cluster A	-14.7046	Low m6Ascore
TCGA-E9-A228-01A	1285	0	58	Tumor	TCGA-BRCA	unknown	unknown	Positive	m6Acluster B	NO	>53	Alive	Gene.cluster A	-13.4201	Low m6Ascore
TCGA-A2-A3KD-01A	1206	0	47	Tumor	TCGA-BRCA	unknown	unknown	unknown	m6Acluster A	unknown	<=53	Alive	Gene.cluster A	-15.3448	Low m6Ascore
TCGA-AQ-A7U7-01A	584	1	55	Tumor	TCGA-BRCA	unknown	unknown	unknown	m6Acluster C	unknown	>53	Dead	Gene.cluster C	-15.1137	Low m6Ascore
TCGA-AO-A1KS-01A	350	0	69	Tumor	TCGA-BRCA	Positive	Positive	Negative	m6Acluster B	NO	>53	Alive	Gene.cluster A	-14.2482	Low m6Ascore
TCGA-A7-A0DC-01B	906	0	63	Tumor	TCGA-BRCA	Positive	Negative	Negative	m6Acluster B	NO	>53	Alive	Gene.cluster A	-14.3914	Low m6Ascore
TCGA-BH-A0EB-01A	745	0	69	Tumor	TCGA-BRCA	Positive	Positive	Negative	m6Acluster C	NO	>53	Alive	Gene.cluster C	-16.5707	Low m6Ascore
TCGA-C8-A12W-01A	385	0	49	Tumor	TCGA-BRCA	Positive	Positive	Negative	m6Acluster A	NO	<=53	Alive	Gene.cluster A	-11.7295	High m6Ascore
TCGA-AR-A24L-01A	2866	1	26	Tumor	TCGA-BRCA	Positive	Positive	Negative	m6Acluster B	NO	<=53	Dead	Gene.cluster A	-15.9993	Low m6Ascore
TCGA-EW-A1PB-01A	608	0	70	Tumor	TCGA-BRCA	Negative	Negative	Negative	m6Acluster B	YES	>53	Alive	Gene.cluster B	-7.74158	High m6Ascore
TCGA-D8-A1JJ-01A	611	0	54	Tumor	TCGA-BRCA	Positive	Positive	Negative	m6Acluster C	NO	>53	Alive	Gene.cluster A	-13.1854	High m6Ascore
TCGA-C8-A12Z-01A	382	0	45	Tumor	TCGA-BRCA	Negative	Negative	Positive	m6Acluster B	NO	<=53	Alive	Gene.cluster B	-8.08708	High m6Ascore
TCGA-A8-A09X-01A	426	1	62	Tumor	TCGA-BRCA	Negative	Negative	Negative	m6Acluster A	YES	>53	Dead	Gene.cluster B	-10.4846	High m6Ascore
TCGA-AC-A62Y-01A	530	0	79	Tumor	TCGA-BRCA	unknown	unknown	unknown	m6Acluster C	unknown	>53	Alive	Gene.cluster C	-13.8787	Low m6Ascore
TCGA-AC-A3YJ-01A	754	0	66	Tumor	TCGA-BRCA	unknown	unknown	unknown	m6Acluster C	unknown	>53	Alive	Gene.cluster C	-21.0999	Low m6Ascore
TCGA-E9-A22G-01A	1239	0	47	Tumor	TCGA-BRCA	Negative	Negative	Negative	m6Acluster B	YES	<=53	Alive	Gene.cluster B	-5.85443	High m6Ascore
TCGA-GM-A5PX-01A	551	0	65	Tumor	TCGA-BRCA	unknown	unknown	unknown	m6Acluster A	unknown	>53	Alive	Gene.cluster C	-15.8688	Low m6Ascore
TCGA-A2-A4RX-01A	742	0	67	Tumor	TCGA-BRCA	unknown	unknown	unknown	m6Acluster C	unknown	>53	Alive	Gene.cluster B	-11.198	High m6Ascore
TCGA-B6-A0WW-01A	558	1	58	Tumor	TCGA-BRCA	Positive	Positive	Negative	m6Acluster A	NO	>53	Dead	Gene.cluster A	-13.8191	Low m6Ascore
TCGA-A2-A0SV-01A	825	1	63	Tumor	TCGA-BRCA	Positive	Positive	Negative	m6Acluster C	NO	>53	Dead	Gene.cluster B	-8.69934	High m6Ascore
TCGA-AR-A24U-01A	3128	0	47	Tumor	TCGA-BRCA	Negative	Negative	Positive	m6Acluster B	NO	<=53	Alive	Gene.cluster B	-10.285	High m6Ascore
TCGA-B6-A0X0-01A	3945	1	54	Tumor	TCGA-BRCA	Positive	Positive	Negative	m6Acluster C	NO	>53	Dead	Gene.cluster A	-13.5457	Low m6Ascore
TCGA-BH-A0EA-01A	991	1	72	Tumor	TCGA-BRCA	Positive	Positive	Negative	m6Acluster C	NO	>53	Dead	Gene.cluster C	-14.4929	Low m6Ascore
TCGA-LL-A440-01A	759	0	61	Tumor	TCGA-BRCA	unknown	unknown	unknown	m6Acluster C	unknown	>53	Alive	Gene.cluster C	-14.3832	Low m6Ascore
TCGA-A1-A0SQ-01A	554	0	45	Tumor	TCGA-BRCA	Positive	Positive	Negative	m6Acluster C	NO	<=53	Alive	Gene.cluster A	-15.7852	Low m6Ascore
TCGA-A8-A09N-01A	31	0	57	Tumor	TCGA-BRCA	Positive	Positive	Positive	m6Acluster C	NO	>53	Alive	Gene.cluster A	-16.3834	Low m6Ascore
TCGA-AC-A3QQ-01B	734	0	54	Tumor	TCGA-BRCA	unknown	unknown	unknown	m6Acluster B	unknown	>53	Alive	Gene.cluster A	-13.0987	High m6Ascore
TCGA-BH-A18V-06A	1556	1	48	Tumor	TCGA-BRCA	unknown	unknown	unknown	m6Acluster B	unknown	<=53	Dead	Gene.cluster B	-9.34709	High m6Ascore
TCGA-BH-A18H-01A	652	0	63	Tumor	TCGA-BRCA	Positive	Positive	Negative	m6Acluster B	NO	>53	Alive	Gene.cluster A	-14.9267	Low m6Ascore
TCGA-E2-A1LH-01A	3247	0	59	Tumor	TCGA-BRCA	Negative	Negative	Negative	m6Acluster A	YES	>53	Alive	Gene.cluster B	-8.24639	High m6Ascore
TCGA-C8-A27A-01A	747	0	48	Tumor	TCGA-BRCA	Positive	Positive	Negative	m6Acluster B	NO	<=53	Alive	Gene.cluster A	-11.4733	High m6Ascore
TCGA-E9-A1R4-01A	186	0	66	Tumor	TCGA-BRCA	unknown	unknown	Negative	m6Acluster B	unknown	>53	Alive	Gene.cluster A	-13.9897	Low m6Ascore
TCGA-A2-A3XU-01A	912	1	35	Tumor	TCGA-BRCA	unknown	unknown	unknown	m6Acluster C	unknown	<=53	Dead	Gene.cluster B	-5.33164	High m6Ascore
TCGA-HN-A2NL-01A	79	0	56	Tumor	TCGA-BRCA	unknown	unknown	unknown	m6Acluster A	unknown	>53	Alive	Gene.cluster B	-6.22282	High m6Ascore
TCGA-BH-A0BO-01A	2197	0	54	Tumor	TCGA-BRCA	Positive	Positive	Negative	m6Acluster C	NO	>53	Alive	Gene.cluster C	-17.0463	Low m6Ascore
TCGA-D8-A1Y0-01A	472	0	65	Tumor	TCGA-BRCA	Positive	Positive	Negative	m6Acluster A	NO	>53	Alive	Gene.cluster A	-15.538	Low m6Ascore
TCGA-B6-A40B-01A	3152	0	76	Tumor	TCGA-BRCA	unknown	unknown	unknown	m6Acluster A	unknown	>53	Alive	Gene.cluster A	-11.7532	High m6Ascore
TCGA-PL-A8LX-01A	5	0	35	Tumor	TCGA-BRCA	unknown	unknown	unknown	m6Acluster C	unknown	<=53	Alive	Gene.cluster A	-13.1716	High m6Ascore
TCGA-B6-A1KF-01A	3088	0	68	Tumor	TCGA-BRCA	Negative	Negative	Positive	m6Acluster C	NO	>53	Alive	Gene.cluster B	-5.81905	High m6Ascore
TCGA-AO-A0J7-01A	618	0	71	Tumor	TCGA-BRCA	Positive	Positive	Negative	m6Acluster A	NO	>53	Alive	Gene.cluster A	-13.0685	High m6Ascore
TCGA-EW-A2FV-01A	788	0	39	Tumor	TCGA-BRCA	Positive	Positive	unknown	m6Acluster B	NO	<=53	Alive	Gene.cluster B	-11.9177	High m6Ascore
TCGA-AR-A252-01A	2838	0	50	Tumor	TCGA-BRCA	Positive	Positive	Negative	m6Acluster C	NO	<=53	Alive	Gene.cluster A	-14.5582	Low m6Ascore
TCGA-AN-A0XR-01A	10	0	55	Tumor	TCGA-BRCA	Positive	Negative	Negative	m6Acluster A	NO	>53	Alive	Gene.cluster A	-13.4402	Low m6Ascore
TCGA-A2-A0YC-01A	990	0	59	Tumor	TCGA-BRCA	Positive	Positive	Negative	m6Acluster B	NO	>53	Alive	Gene.cluster A	-14.727	Low m6Ascore
TCGA-A8-A07P-01A	334	0	68	Tumor	TCGA-BRCA	Positive	Positive	Positive	m6Acluster B	NO	>53	Alive	Gene.cluster A	-15.9266	Low m6Ascore
TCGA-E9-A3X8-01A	926	0	48	Tumor	TCGA-BRCA	unknown	unknown	unknown	m6Acluster C	unknown	<=53	Alive	Gene.cluster C	-14.7167	Low m6Ascore
TCGA-AC-A2B8-01A	677	0	84	Tumor	TCGA-BRCA	unknown	unknown	unknown	m6Acluster B	unknown	>53	Alive	Gene.cluster C	-15.3728	Low m6Ascore
TCGA-AO-A0JL-01A	1683	0	59	Tumor	TCGA-BRCA	Negative	Negative	Negative	m6Acluster A	YES	>53	Alive	Gene.cluster B	-5.89258	High m6Ascore
TCGA-D8-A27W-01A	373	0	55	Tumor	TCGA-BRCA	Positive	Positive	Positive	m6Acluster C	NO	>53	Alive	Gene.cluster A	-12.6616	High m6Ascore
TCGA-B6-A0RO-01A	4929	0	71	Tumor	TCGA-BRCA	Positive	Positive	Negative	m6Acluster B	NO	>53	Alive	Gene.cluster C	-15.8125	Low m6Ascore
TCGA-BH-A0DE-01A	2372	0	62	Tumor	TCGA-BRCA	Positive	Positive	Negative	m6Acluster B	NO	>53	Alive	Gene.cluster C	-16.6393	Low m6Ascore
TCGA-D8-A147-01A	584	0	45	Tumor	TCGA-BRCA	Negative	Negative	Negative	m6Acluster B	YES	<=53	Alive	Gene.cluster B	-7.31547	High m6Ascore
TCGA-BH-A202-01A	795	0	60	Tumor	TCGA-BRCA	Positive	Positive	unknown	m6Acluster B	NO	>53	Alive	Gene.cluster B	-10.7702	High m6Ascore
TCGA-BH-A18R-01A	1142	1	50	Tumor	TCGA-BRCA	unknown	Negative	Positive	m6Acluster B	NO	<=53	Dead	Gene.cluster A	-10.1239	High m6Ascore
TCGA-B6-A0RV-01A	5156	0	42	Tumor	TCGA-BRCA	Positive	Positive	Negative	m6Acluster A	NO	<=53	Alive	Gene.cluster A	-16.809	Low m6Ascore
TCGA-D8-A27P-01A	49	0	64	Tumor	TCGA-BRCA	Positive	Positive	Negative	m6Acluster C	NO	>53	Alive	Gene.cluster C	-18.0203	Low m6Ascore
TCGA-BH-A0W7-01A	1363	0	49	Tumor	TCGA-BRCA	Positive	Positive	Negative	m6Acluster A	NO	<=53	Alive	Gene.cluster A	-14.779	Low m6Ascore
TCGA-AC-A7VB-01A	250	0	51	Tumor	TCGA-BRCA	unknown	unknown	unknown	m6Acluster A	unknown	<=53	Alive	Gene.cluster A	-14.1367	Low m6Ascore
TCGA-AN-A046-01A	10	0	68	Tumor	TCGA-BRCA	Positive	Positive	Negative	m6Acluster A	NO	>53	Alive	Gene.cluster A	-13.4182	Low m6Ascore
TCGA-A2-A0SX-01A	1534	0	48	Tumor	TCGA-BRCA	Negative	Negative	Negative	m6Acluster B	YES	<=53	Alive	Gene.cluster B	-8.70529	High m6Ascore
TCGA-BH-A8G0-01A	662	0	54	Tumor	TCGA-BRCA	unknown	unknown	unknown	m6Acluster A	unknown	>53	Alive	Gene.cluster C	-16.4846	Low m6Ascore
TCGA-BH-A0HP-01A	414	0	65	Tumor	TCGA-BRCA	Positive	Negative	Negative	m6Acluster C	NO	>53	Alive	Gene.cluster C	-15.821	Low m6Ascore
TCGA-BH-A18U-01A	1563	1	72	Tumor	TCGA-BRCA	Positive	Positive	Positive	m6Acluster A	NO	>53	Dead	Gene.cluster A	-9.67022	High m6Ascore
TCGA-AN-A0AS-01A	10	0	70	Tumor	TCGA-BRCA	Positive	Negative	Negative	m6Acluster B	NO	>53	Alive	Gene.cluster C	-10.8034	High m6Ascore
TCGA-AO-A0JC-01A	1547	0	64	Tumor	TCGA-BRCA	Positive	Positive	Negative	m6Acluster A	NO	>53	Alive	Gene.cluster A	-13.9406	Low m6Ascore
TCGA-BH-A1F2-01A	959	1	53	Tumor	TCGA-BRCA	Positive	Positive	Positive	m6Acluster B	NO	<=53	Dead	Gene.cluster A	-13.7839	Low m6Ascore
TCGA-BH-A18M-01A	2207	1	39	Tumor	TCGA-BRCA	Positive	Positive	Positive	m6Acluster C	NO	<=53	Dead	Gene.cluster A	-16.455	Low m6Ascore
TCGA-C8-A12L-01A	363	0	67	Tumor	TCGA-BRCA	Negative	Negative	Positive	m6Acluster B	NO	>53	Alive	Gene.cluster B	-7.48299	High m6Ascore
TCGA-E9-A1R7-01A	1467	0	64	Tumor	TCGA-BRCA	unknown	unknown	Negative	m6Acluster B	unknown	>53	Alive	Gene.cluster A	-12.1441	High m6Ascore
TCGA-BH-A1FH-01A	1034	1	47	Tumor	TCGA-BRCA	Positive	Negative	Negative	m6Acluster C	NO	<=53	Dead	Gene.cluster C	-15.645	Low m6Ascore
TCGA-AR-A24V-01A	3203	0	52	Tumor	TCGA-BRCA	Positive	Positive	Negative	m6Acluster C	NO	<=53	Alive	Gene.cluster A	-14.8151	Low m6Ascore
TCGA-AC-A6IX-01A	373	0	49	Tumor	TCGA-BRCA	unknown	unknown	unknown	m6Acluster C	unknown	<=53	Alive	Gene.cluster C	-14.1013	Low m6Ascore
TCGA-D8-A1JH-01A	426	0	56	Tumor	TCGA-BRCA	Positive	Positive	Negative	m6Acluster C	NO	>53	Alive	Gene.cluster C	-19.8619	Low m6Ascore
TCGA-BH-A1FE-01A	2273	1	31	Tumor	TCGA-BRCA	Positive	Positive	Negative	m6Acluster C	NO	<=53	Dead	Gene.cluster A	-14.735	Low m6Ascore
TCGA-A2-A25C-01A	523	0	50	Tumor	TCGA-BRCA	Positive	Positive	Negative	m6Acluster B	NO	<=53	Alive	Gene.cluster A	-17.9875	Low m6Ascore
TCGA-B6-A0IQ-01A	4285	0	40	Tumor	TCGA-BRCA	Negative	Negative	Negative	m6Acluster A	YES	<=53	Alive	Gene.cluster B	-5.38759	High m6Ascore
TCGA-AO-A0JI-01A	1528	0	56	Tumor	TCGA-BRCA	Positive	Negative	Negative	m6Acluster C	NO	>53	Alive	Gene.cluster A	-15.9284	Low m6Ascore
TCGA-B6-A0IA-01A	8391	0	51	Tumor	TCGA-BRCA	Positive	Positive	Negative	m6Acluster B	NO	<=53	Alive	Gene.cluster A	-10.7736	High m6Ascore
TCGA-E2-A1L7-01A	1836	0	40	Tumor	TCGA-BRCA	Negative	Negative	Negative	m6Acluster B	YES	<=53	Alive	Gene.cluster A	-11.5601	High m6Ascore
TCGA-BH-A18F-01A	1001	0	50	Tumor	TCGA-BRCA	Positive	Positive	Negative	m6Acluster B	NO	<=53	Alive	Gene.cluster A	-13.9277	Low m6Ascore
TCGA-C8-A1HI-01A	343	0	40	Tumor	TCGA-BRCA	Positive	Positive	Negative	m6Acluster C	NO	<=53	Alive	Gene.cluster C	-14.523	Low m6Ascore
TCGA-A2-A0YD-01A	769	0	63	Tumor	TCGA-BRCA	Positive	Positive	Negative	m6Acluster B	NO	>53	Alive	Gene.cluster C	-19.1018	Low m6Ascore
TCGA-A8-A06U-01A	883	1	80	Tumor	TCGA-BRCA	Positive	Positive	unknown	m6Acluster C	NO	>53	Dead	Gene.cluster A	-12.247	High m6Ascore
TCGA-BH-A18S-01A	2009	1	79	Tumor	TCGA-BRCA	Positive	Positive	unknown	m6Acluster C	NO	>53	Dead	Gene.cluster C	-16.9835	Low m6Ascore
TCGA-A8-A08S-01A	1004	0	71	Tumor	TCGA-BRCA	Positive	Positive	Positive	m6Acluster B	NO	>53	Alive	Gene.cluster A	-13.2239	High m6Ascore
TCGA-A8-A08C-01A	881	0	65	Tumor	TCGA-BRCA	Positive	Positive	Negative	m6Acluster A	NO	>53	Alive	Gene.cluster A	-13.6484	Low m6Ascore
TCGA-C8-A1HO-01A	375	0	34	Tumor	TCGA-BRCA	Positive	Positive	Negative	m6Acluster B	NO	<=53	Alive	Gene.cluster A	-13.5945	Low m6Ascore
TCGA-AO-A0JG-01A	798	0	49	Tumor	TCGA-BRCA	Positive	Positive	Negative	m6Acluster C	NO	<=53	Alive	Gene.cluster C	-16.0155	Low m6Ascore
TCGA-E9-A1NF-01A	1072	1	60	Tumor	TCGA-BRCA	Positive	Positive	Negative	m6Acluster C	NO	>53	Dead	Gene.cluster C	-13.3189	Low m6Ascore
TCGA-AO-A0J6-01A	1140	0	61	Tumor	TCGA-BRCA	Negative	Negative	Negative	m6Acluster C	YES	>53	Alive	Gene.cluster B	-7.75829	High m6Ascore
TCGA-LL-A5YP-01A	450	0	49	Tumor	TCGA-BRCA	unknown	unknown	unknown	m6Acluster C	unknown	<=53	Alive	Gene.cluster B	-8.19465	High m6Ascore
TCGA-BH-A0DI-01A	912	0	63	Tumor	TCGA-BRCA	Positive	Positive	Negative	m6Acluster C	NO	>53	Alive	Gene.cluster C	-14.1346	Low m6Ascore
TCGA-BH-A1FJ-01A	1927	1	66	Tumor	TCGA-BRCA	Negative	Positive	Negative	m6Acluster A	NO	>53	Dead	Gene.cluster A	-14.0355	Low m6Ascore
TCGA-UU-A93S-01A	116	1	63	Tumor	TCGA-BRCA	unknown	unknown	unknown	m6Acluster C	unknown	>53	Dead	Gene.cluster B	-7.5548	High m6Ascore
TCGA-A2-A0YE-01A	554	0	48	Tumor	TCGA-BRCA	Negative	Negative	Negative	m6Acluster C	YES	<=53	Alive	Gene.cluster B	-5.63488	High m6Ascore
TCGA-BH-A209-01A	3959	1	77	Tumor	TCGA-BRCA	Positive	Positive	unknown	m6Acluster A	NO	>53	Dead	Gene.cluster B	-9.71918	High m6Ascore
TCGA-OL-A5RX-01A	878	0	51	Tumor	TCGA-BRCA	unknown	unknown	unknown	m6Acluster C	unknown	<=53	Alive	Gene.cluster C	-14.0336	Low m6Ascore
TCGA-E2-A15D-01A	526	0	47	Tumor	TCGA-BRCA	Positive	Positive	Negative	m6Acluster C	NO	<=53	Alive	Gene.cluster C	-14.101	Low m6Ascore
TCGA-D8-A27H-01A	397	0	72	Tumor	TCGA-BRCA	Negative	Negative	Negative	m6Acluster B	YES	>53	Alive	Gene.cluster B	-9.77166	High m6Ascore
TCGA-BH-A1F6-01A	2965	1	51	Tumor	TCGA-BRCA	Negative	Negative	unknown	m6Acluster B	unknown	<=53	Dead	Gene.cluster B	-7.17359	High m6Ascore
TCGA-A1-A0SD-01A	437	0	59	Tumor	TCGA-BRCA	Positive	Positive	Negative	m6Acluster B	NO	>53	Alive	Gene.cluster C	-15.1967	Low m6Ascore
TCGA-A7-A26J-01B	627	0	49	Tumor	TCGA-BRCA	Positive	Positive	Negative	m6Acluster B	NO	<=53	Alive	Gene.cluster A	-16.2011	Low m6Ascore
TCGA-D8-A1XC-01A	377	1	85	Tumor	TCGA-BRCA	Positive	Positive	Negative	m6Acluster C	NO	>53	Dead	Gene.cluster A	-15.2904	Low m6Ascore
TCGA-A2-A04R-01A	3709	0	36	Tumor	TCGA-BRCA	Positive	Positive	Negative	m6Acluster A	NO	<=53	Alive	Gene.cluster A	-13.447	Low m6Ascore
TCGA-LD-A66U-01A	646	0	44	Tumor	TCGA-BRCA	unknown	unknown	unknown	m6Acluster A	unknown	<=53	Alive	Gene.cluster C	-15.3142	Low m6Ascore
TCGA-E2-A15O-01A	289	0	89	Tumor	TCGA-BRCA	Positive	Positive	Negative	m6Acluster C	NO	>53	Alive	Gene.cluster A	-11.7921	High m6Ascore
TCGA-AR-A24T-01A	3202	0	46	Tumor	TCGA-BRCA	Positive	Positive	Negative	m6Acluster C	NO	<=53	Alive	Gene.cluster C	-15.3363	Low m6Ascore
TCGA-BH-A0HO-01A	76	0	48	Tumor	TCGA-BRCA	Positive	Positive	Negative	m6Acluster C	NO	<=53	Alive	Gene.cluster C	-22.9876	Low m6Ascore
TCGA-A7-A6VW-01A	285	0	48	Tumor	TCGA-BRCA	unknown	unknown	unknown	m6Acluster B	unknown	<=53	Alive	Gene.cluster B	-5.9923	High m6Ascore
TCGA-BH-A0HY-01A	1545	0	60	Tumor	TCGA-BRCA	Positive	Negative	unknown	m6Acluster A	NO	>53	Alive	Gene.cluster A	-12.0896	High m6Ascore
TCGA-3C-AALJ-01A	1474	0	62	Tumor	TCGA-BRCA	unknown	unknown	unknown	m6Acluster A	unknown	>53	Alive	Gene.cluster A	-10.149	High m6Ascore
TCGA-BH-AB28-01A	287	0	53	Tumor	TCGA-BRCA	unknown	unknown	unknown	m6Acluster A	unknown	<=53	Alive	Gene.cluster C	-13.7534	Low m6Ascore
TCGA-A7-A0CG-01A	1043	0	78	Tumor	TCGA-BRCA	Positive	Negative	Negative	m6Acluster C	NO	>53	Alive	Gene.cluster C	-16.7848	Low m6Ascore
TCGA-B6-A0WV-01A	2417	1	67	Tumor	TCGA-BRCA	Positive	Positive	Negative	m6Acluster B	NO	>53	Dead	Gene.cluster A	-15.9659	Low m6Ascore
TCGA-D8-A1XF-01A	463	0	45	Tumor	TCGA-BRCA	Positive	Positive	Negative	m6Acluster A	NO	<=53	Alive	Gene.cluster A	-8.53744	High m6Ascore
TCGA-BH-A0BQ-01A	2255	0	39	Tumor	TCGA-BRCA	Positive	Positive	Negative	m6Acluster C	NO	<=53	Alive	Gene.cluster C	-14.5703	Low m6Ascore
TCGA-EW-A1PC-01B	187	0	66	Tumor	TCGA-BRCA	unknown	unknown	unknown	m6Acluster B	unknown	>53	Alive	Gene.cluster B	-10.0815	High m6Ascore
TCGA-A8-A08I-01A	365	0	53	Tumor	TCGA-BRCA	Positive	Positive	Negative	m6Acluster C	NO	<=53	Alive	Gene.cluster A	-15.8025	Low m6Ascore
TCGA-B6-A0X4-01A	860	1	62	Tumor	TCGA-BRCA	Positive	Positive	Negative	m6Acluster C	NO	>53	Dead	Gene.cluster A	-20.4419	Low m6Ascore
TCGA-E9-A2JS-01A	904	1	72	Tumor	TCGA-BRCA	unknown	unknown	unknown	m6Acluster B	unknown	>53	Dead	Gene.cluster A	-10.109	High m6Ascore
TCGA-B6-A0WY-01A	3461	1	40	Tumor	TCGA-BRCA	Positive	Negative	Negative	m6Acluster C	NO	<=53	Dead	Gene.cluster C	-13.2653	High m6Ascore
TCGA-A8-A09E-01A	1492	0	73	Tumor	TCGA-BRCA	Positive	Positive	unknown	m6Acluster B	NO	>53	Alive	Gene.cluster A	-10.9549	High m6Ascore
TCGA-BH-A1ES-06A	3462	1	35	Tumor	TCGA-BRCA	unknown	unknown	unknown	m6Acluster B	unknown	<=53	Dead	Gene.cluster C	-10.099	High m6Ascore
TCGA-EW-A1OW-01A	694	0	58	Tumor	TCGA-BRCA	Negative	Negative	Negative	m6Acluster C	YES	>53	Alive	Gene.cluster B	-7.78937	High m6Ascore
TCGA-D8-A1XD-01A	522	0	36	Tumor	TCGA-BRCA	Positive	Positive	Negative	m6Acluster C	NO	<=53	Alive	Gene.cluster A	-15.4023	Low m6Ascore
TCGA-E9-A54X-01A	727	0	85	Tumor	TCGA-BRCA	unknown	unknown	unknown	m6Acluster C	unknown	>53	Alive	Gene.cluster A	-14.6435	Low m6Ascore
TCGA-B6-A0RG-01A	2082	0	26	Tumor	TCGA-BRCA	Negative	Negative	Negative	m6Acluster A	YES	<=53	Alive	Gene.cluster A	-16.2464	Low m6Ascore
TCGA-A8-A097-01A	365	0	65	Tumor	TCGA-BRCA	Positive	Positive	Positive	m6Acluster C	NO	>53	Alive	Gene.cluster A	-13.9962	Low m6Ascore
TCGA-A2-A0CX-01A	1728	0	52	Tumor	TCGA-BRCA	Positive	Negative	Positive	m6Acluster B	NO	<=53	Alive	Gene.cluster B	-9.60362	High m6Ascore
TCGA-E9-A5FK-01A	812	0	60	Tumor	TCGA-BRCA	unknown	unknown	unknown	m6Acluster A	unknown	>53	Alive	Gene.cluster C	-13.0614	High m6Ascore
TCGA-C8-A8HQ-01A	380	0	53	Tumor	TCGA-BRCA	unknown	unknown	unknown	m6Acluster B	unknown	<=53	Alive	Gene.cluster A	-11.726	High m6Ascore
TCGA-BH-A0BP-01A	2296	1	76	Tumor	TCGA-BRCA	Positive	Positive	Negative	m6Acluster B	NO	>53	Dead	Gene.cluster C	-13.7683	Low m6Ascore
TCGA-B6-A0RL-01A	2469	1	60	Tumor	TCGA-BRCA	Positive	Positive	Negative	m6Acluster B	NO	>53	Dead	Gene.cluster A	-9.23287	High m6Ascore
TCGA-A8-A08F-01A	1004	0	59	Tumor	TCGA-BRCA	Positive	Positive	Negative	m6Acluster A	NO	>53	Alive	Gene.cluster A	-10.9787	High m6Ascore
TCGA-A2-A0CK-01A	4159	0	60	Tumor	TCGA-BRCA	unknown	unknown	unknown	m6Acluster A	unknown	>53	Alive	Gene.cluster A	-15.5572	Low m6Ascore
TCGA-E9-A1N4-01A	1000	0	41	Tumor	TCGA-BRCA	Positive	Positive	Negative	m6Acluster C	NO	<=53	Alive	Gene.cluster A	-17.3957	Low m6Ascore
TCGA-D8-A1XZ-01A	466	0	81	Tumor	TCGA-BRCA	Positive	Negative	Negative	m6Acluster B	NO	>53	Alive	Gene.cluster A	-11.2477	High m6Ascore
TCGA-AR-A1AS-01A	1150	0	54	Tumor	TCGA-BRCA	Positive	Positive	Negative	m6Acluster A	NO	>53	Alive	Gene.cluster A	-11.9247	High m6Ascore
TCGA-EW-A424-01A	715	0	51	Tumor	TCGA-BRCA	unknown	unknown	unknown	m6Acluster A	unknown	<=53	Alive	Gene.cluster A	-13.8876	Low m6Ascore
TCGA-A7-A3RF-01A	408	0	79	Tumor	TCGA-BRCA	unknown	unknown	unknown	m6Acluster C	unknown	>53	Alive	Gene.cluster A	-21.3114	Low m6Ascore
TCGA-AR-A24H-01A	4894	0	65	Tumor	TCGA-BRCA	Positive	Positive	Negative	m6Acluster B	NO	>53	Alive	Gene.cluster B	-13.7902	Low m6Ascore
TCGA-A8-A06T-01A	1614	0	75	Tumor	TCGA-BRCA	Positive	Positive	Negative	m6Acluster C	NO	>53	Alive	Gene.cluster A	-15.1634	Low m6Ascore
TCGA-C8-A1HL-01A	317	0	38	Tumor	TCGA-BRCA	Positive	Negative	Positive	m6Acluster A	NO	<=53	Alive	Gene.cluster A	-15.7203	Low m6Ascore
TCGA-D8-A1X8-01A	783	0	62	Tumor	TCGA-BRCA	Positive	unknown	Negative	m6Acluster B	NO	>53	Alive	Gene.cluster A	-17.0833	Low m6Ascore
TCGA-AO-A1KT-01A	541	0	78	Tumor	TCGA-BRCA	Positive	Positive	Negative	m6Acluster A	NO	>53	Alive	Gene.cluster A	-11.2348	High m6Ascore
TCGA-B6-A0RQ-01A	4267	1	68	Tumor	TCGA-BRCA	Positive	Positive	Negative	m6Acluster C	NO	>53	Dead	Gene.cluster C	-15.5656	Low m6Ascore
TCGA-AR-A1AQ-01A	3021	0	49	Tumor	TCGA-BRCA	Negative	Negative	Negative	m6Acluster B	YES	<=53	Alive	Gene.cluster B	-6.88176	High m6Ascore
TCGA-OL-A5D6-01A	1104	1	71	Tumor	TCGA-BRCA	unknown	unknown	unknown	m6Acluster C	unknown	>53	Dead	Gene.cluster C	-11.5039	High m6Ascore
TCGA-A8-A091-01A	1004	0	61	Tumor	TCGA-BRCA	Positive	Negative	Negative	m6Acluster B	NO	>53	Alive	Gene.cluster A	-16.0589	Low m6Ascore
TCGA-A7-A4SE-01A	644	0	54	Tumor	TCGA-BRCA	unknown	unknown	unknown	m6Acluster B	unknown	>53	Alive	Gene.cluster B	-9.03544	High m6Ascore
TCGA-AC-A2FE-01A	2636	1	62	Tumor	TCGA-BRCA	unknown	unknown	unknown	m6Acluster B	unknown	>53	Dead	Gene.cluster C	-14.2139	Low m6Ascore
TCGA-C8-A26Z-01A	470	0	59	Tumor	TCGA-BRCA	Positive	Positive	Negative	m6Acluster C	NO	>53	Alive	Gene.cluster A	-15.897	Low m6Ascore
TCGA-C8-A12Y-01A	1476	0	44	Tumor	TCGA-BRCA	unknown	unknown	Negative	m6Acluster C	unknown	<=53	Alive	Gene.cluster A	-13.3373	Low m6Ascore
TCGA-A7-A13F-01A	765	0	44	Tumor	TCGA-BRCA	Positive	Positive	Negative	m6Acluster C	NO	<=53	Alive	Gene.cluster A	-13.8095	Low m6Ascore
TCGA-BH-A28Q-01A	1119	0	46	Tumor	TCGA-BRCA	Positive	Positive	unknown	m6Acluster A	NO	<=53	Alive	Gene.cluster C	-17.0503	Low m6Ascore
TCGA-GM-A5PV-01A	412	0	63	Tumor	TCGA-BRCA	unknown	unknown	unknown	m6Acluster C	unknown	>53	Alive	Gene.cluster C	-19.2202	Low m6Ascore
TCGA-A7-A4SC-01A	446	0	62	Tumor	TCGA-BRCA	unknown	unknown	unknown	m6Acluster C	unknown	>53	Alive	Gene.cluster C	-16.9477	Low m6Ascore
TCGA-E2-A15H-01A	393	0	38	Tumor	TCGA-BRCA	Positive	Positive	Positive	m6Acluster A	NO	<=53	Alive	Gene.cluster A	-15.8321	Low m6Ascore
TCGA-A7-A13E-01B	614	1	62	Tumor	TCGA-BRCA	Positive	Negative	Negative	m6Acluster B	NO	>53	Dead	Gene.cluster B	-10.7604	High m6Ascore
TCGA-B6-A0IH-01A	2965	1	81	Tumor	TCGA-BRCA	Positive	Positive	Negative	m6Acluster C	NO	>53	Dead	Gene.cluster C	-14.9638	Low m6Ascore
TCGA-A2-A1G4-01A	595	0	71	Tumor	TCGA-BRCA	Positive	Positive	Negative	m6Acluster C	NO	>53	Alive	Gene.cluster A	-12.1017	High m6Ascore
TCGA-A8-A093-01A	546	0	61	Tumor	TCGA-BRCA	Positive	Positive	Negative	m6Acluster C	NO	>53	Alive	Gene.cluster A	-16.0435	Low m6Ascore
TCGA-C8-A12O-01A	385	0	50	Tumor	TCGA-BRCA	Positive	Positive	unknown	m6Acluster A	NO	<=53	Alive	Gene.cluster A	-12.8426	High m6Ascore
TCGA-AO-A1KQ-01A	1882	0	84	Tumor	TCGA-BRCA	Positive	Positive	Negative	m6Acluster A	NO	>53	Alive	Gene.cluster A	-12.2059	High m6Ascore
TCGA-AR-A256-01A	2854	1	45	Tumor	TCGA-BRCA	Negative	Negative	Negative	m6Acluster B	YES	<=53	Dead	Gene.cluster B	-6.11764	High m6Ascore
TCGA-OL-A66I-01A	714	0	36	Tumor	TCGA-BRCA	unknown	unknown	unknown	m6Acluster B	unknown	<=53	Alive	Gene.cluster B	-8.3481	High m6Ascore
TCGA-C8-A3M7-01A	1034	1	60	Tumor	TCGA-BRCA	unknown	unknown	unknown	m6Acluster A	unknown	>53	Dead	Gene.cluster C	-12.8972	High m6Ascore
TCGA-A2-A04W-01A	3102	0	50	Tumor	TCGA-BRCA	Negative	Negative	Positive	m6Acluster C	NO	<=53	Alive	Gene.cluster B	-8.57615	High m6Ascore
TCGA-OL-A97C-01A	271	0	67	Tumor	TCGA-BRCA	unknown	unknown	unknown	m6Acluster C	unknown	>53	Alive	Gene.cluster A	-14.5521	Low m6Ascore
TCGA-AR-A1AM-01A	2991	0	52	Tumor	TCGA-BRCA	unknown	unknown	unknown	m6Acluster C	unknown	<=53	Alive	Gene.cluster C	-15.6379	Low m6Ascore
TCGA-AR-A2LR-01A	1742	0	49	Tumor	TCGA-BRCA	unknown	unknown	unknown	m6Acluster C	unknown	<=53	Alive	Gene.cluster B	-9.63996	High m6Ascore
TCGA-EW-A1OZ-01A	1229	0	56	Tumor	TCGA-BRCA	Positive	Negative	Positive	m6Acluster A	NO	>53	Alive	Gene.cluster A	-8.48777	High m6Ascore
TCGA-A1-A0SF-01A	1463	0	54	Tumor	TCGA-BRCA	Positive	Positive	Negative	m6Acluster C	NO	>53	Alive	Gene.cluster C	-15.048	Low m6Ascore
TCGA-A1-A0SJ-01A	416	0	39	Tumor	TCGA-BRCA	Positive	Positive	Negative	m6Acluster B	NO	<=53	Alive	Gene.cluster A	-13.1147	High m6Ascore
TCGA-D8-A1JU-01A	447	0	51	Tumor	TCGA-BRCA	Positive	Positive	Negative	m6Acluster C	NO	<=53	Alive	Gene.cluster C	-17.5131	Low m6Ascore
TCGA-A8-A07F-01A	577	0	65	Tumor	TCGA-BRCA	Positive	Positive	Negative	m6Acluster B	NO	>53	Alive	Gene.cluster A	-14.6261	Low m6Ascore
TCGA-A7-A6VY-01A	266	0	48	Tumor	TCGA-BRCA	unknown	unknown	unknown	m6Acluster B	unknown	<=53	Alive	Gene.cluster B	-6.42299	High m6Ascore
TCGA-A2-A0CU-01A	158	1	73	Tumor	TCGA-BRCA	Positive	Positive	Negative	m6Acluster B	NO	>53	Dead	Gene.cluster A	-15.7843	Low m6Ascore
TCGA-E9-A1NE-01A	1088	0	28	Tumor	TCGA-BRCA	Positive	Positive	Negative	m6Acluster B	NO	<=53	Alive	Gene.cluster A	-15.6239	Low m6Ascore
TCGA-A7-A0D9-01A	1139	0	37	Tumor	TCGA-BRCA	Positive	Negative	Negative	m6Acluster B	NO	<=53	Alive	Gene.cluster A	-12.7582	High m6Ascore
TCGA-A8-A07O-01A	304	0	51	Tumor	TCGA-BRCA	Negative	Negative	Negative	m6Acluster B	YES	<=53	Alive	Gene.cluster B	-6.14732	High m6Ascore
TCGA-C8-A12U-01A	385	0	46	Tumor	TCGA-BRCA	Positive	Positive	Negative	m6Acluster A	NO	<=53	Alive	Gene.cluster A	-8.02697	High m6Ascore
TCGA-C8-A8HP-01A	396	0	59	Tumor	TCGA-BRCA	unknown	unknown	unknown	m6Acluster A	unknown	>53	Alive	Gene.cluster B	-7.53058	High m6Ascore
TCGA-A2-A3XV-01A	996	0	46	Tumor	TCGA-BRCA	unknown	unknown	unknown	m6Acluster C	unknown	<=53	Alive	Gene.cluster C	-10.0673	High m6Ascore
TCGA-BH-A0AW-01A	622	0	56	Tumor	TCGA-BRCA	Positive	Negative	Positive	m6Acluster B	NO	>53	Alive	Gene.cluster B	-10.472	High m6Ascore
TCGA-AN-A0FF-01A	172	0	32	Tumor	TCGA-BRCA	Positive	Positive	Negative	m6Acluster C	NO	<=53	Alive	Gene.cluster A	-20.0256	Low m6Ascore
TCGA-AR-A24M-01A	3660	0	38	Tumor	TCGA-BRCA	Positive	Positive	Negative	m6Acluster C	NO	<=53	Alive	Gene.cluster C	-16.2686	Low m6Ascore
TCGA-E2-A2P6-01A	1051	0	77	Tumor	TCGA-BRCA	unknown	unknown	unknown	m6Acluster A	unknown	>53	Alive	Gene.cluster A	-13.1549	High m6Ascore
TCGA-C8-A130-01A	370	0	52	Tumor	TCGA-BRCA	Positive	Positive	unknown	m6Acluster A	NO	<=53	Alive	Gene.cluster B	-9.22635	High m6Ascore
TCGA-C8-A274-01A	508	0	63	Tumor	TCGA-BRCA	Positive	Positive	Negative	m6Acluster B	NO	>53	Alive	Gene.cluster A	-12.2985	High m6Ascore
TCGA-D8-A73X-01A	767	0	53	Tumor	TCGA-BRCA	unknown	unknown	unknown	m6Acluster A	unknown	<=53	Alive	Gene.cluster A	-14.9327	Low m6Ascore
TCGA-AO-A0JA-01A	655	0	36	Tumor	TCGA-BRCA	Positive	Positive	Negative	m6Acluster C	NO	<=53	Alive	Gene.cluster A	-14.1548	Low m6Ascore
TCGA-LL-A5YN-01A	447	0	46	Tumor	TCGA-BRCA	unknown	unknown	unknown	m6Acluster A	unknown	<=53	Alive	Gene.cluster C	-11.8533	High m6Ascore
TCGA-D8-A1XB-01A	552	0	62	Tumor	TCGA-BRCA	Positive	Positive	Negative	m6Acluster C	NO	>53	Alive	Gene.cluster A	-16.8349	Low m6Ascore
TCGA-A7-A26E-01B	954	0	71	Tumor	TCGA-BRCA	Positive	Positive	Negative	m6Acluster B	NO	>53	Alive	Gene.cluster C	-14.8058	Low m6Ascore
TCGA-A7-A6VX-01A	317	0	68	Tumor	TCGA-BRCA	unknown	unknown	unknown	m6Acluster C	unknown	>53	Alive	Gene.cluster A	-12.1422	High m6Ascore
TCGA-AC-A6IW-01A	413	0	73	Tumor	TCGA-BRCA	unknown	unknown	unknown	m6Acluster B	unknown	>53	Alive	Gene.cluster B	-7.23558	High m6Ascore
TCGA-BH-A0C3-01A	2709	0	47	Tumor	TCGA-BRCA	Positive	Negative	Negative	m6Acluster C	NO	<=53	Alive	Gene.cluster A	-13.3457	Low m6Ascore
TCGA-E2-A1L9-01A	598	0	40	Tumor	TCGA-BRCA	Positive	Positive	Negative	m6Acluster C	NO	<=53	Alive	Gene.cluster A	-15.5192	Low m6Ascore
TCGA-BH-A1EV-01A	365	1	45	Tumor	TCGA-BRCA	Positive	Positive	unknown	m6Acluster A	NO	<=53	Dead	Gene.cluster A	-11.1513	High m6Ascore
TCGA-A2-A3XX-01A	1439	1	49	Tumor	TCGA-BRCA	unknown	unknown	unknown	m6Acluster B	unknown	<=53	Dead	Gene.cluster B	-6.22454	High m6Ascore
TCGA-E9-A1NA-01A	1112	0	58	Tumor	TCGA-BRCA	Positive	Positive	Negative	m6Acluster C	NO	>53	Alive	Gene.cluster A	-11.8239	High m6Ascore
TCGA-EW-A1OY-01A	908	0	63	Tumor	TCGA-BRCA	Positive	Positive	Negative	m6Acluster B	NO	>53	Alive	Gene.cluster A	-12.9287	High m6Ascore
TCGA-BH-A0AU-01A	1914	0	45	Tumor	TCGA-BRCA	Positive	Positive	Negative	m6Acluster B	NO	<=53	Alive	Gene.cluster A	-15.7283	Low m6Ascore
TCGA-B6-A0WS-01A	2965	1	58	Tumor	TCGA-BRCA	Positive	Positive	Negative	m6Acluster C	NO	>53	Dead	Gene.cluster A	-14.4198	Low m6Ascore
TCGA-B6-A0I5-01A	8556	0	49	Tumor	TCGA-BRCA	Positive	Positive	Negative	m6Acluster A	NO	<=53	Alive	Gene.cluster C	-11.1797	High m6Ascore
TCGA-E2-A14P-01A	1246	0	79	Tumor	TCGA-BRCA	Negative	Negative	Positive	m6Acluster A	NO	>53	Alive	Gene.cluster B	-7.84226	High m6Ascore
TCGA-GM-A2DF-01A	2155	0	53	Tumor	TCGA-BRCA	Negative	Negative	unknown	m6Acluster B	unknown	<=53	Alive	Gene.cluster B	-7.06446	High m6Ascore
TCGA-AQ-A04H-01B	754	0	61	Tumor	TCGA-BRCA	Positive	Positive	Positive	m6Acluster B	NO	>53	Alive	Gene.cluster A	-13.1495	High m6Ascore
TCGA-AC-A6NO-01A	51	0	43	Tumor	TCGA-BRCA	unknown	unknown	unknown	m6Acluster A	unknown	<=53	Alive	Gene.cluster A	-11.7925	High m6Ascore
TCGA-BH-A0E9-01B	2489	0	53	Tumor	TCGA-BRCA	Positive	Positive	Negative	m6Acluster C	NO	<=53	Alive	Gene.cluster C	-17.2663	Low m6Ascore
TCGA-BH-A0B1-01A	1148	0	66	Tumor	TCGA-BRCA	Positive	Positive	Negative	m6Acluster C	NO	>53	Alive	Gene.cluster A	-15.9364	Low m6Ascore
TCGA-AR-A0TW-01A	3009	0	50	Tumor	TCGA-BRCA	Positive	Positive	Negative	m6Acluster C	NO	<=53	Alive	Gene.cluster A	-16.0129	Low m6Ascore
TCGA-AN-A0FX-01A	10	0	52	Tumor	TCGA-BRCA	Negative	Negative	Negative	m6Acluster B	YES	<=53	Alive	Gene.cluster B	-9.79699	High m6Ascore
TCGA-BH-A0BD-01A	554	0	47	Tumor	TCGA-BRCA	Positive	Positive	Negative	m6Acluster C	NO	<=53	Alive	Gene.cluster A	-13.0922	High m6Ascore
TCGA-D8-A1JA-01A	502	0	60	Tumor	TCGA-BRCA	Negative	Negative	Positive	m6Acluster C	NO	>53	Alive	Gene.cluster A	-11.608	High m6Ascore
TCGA-S3-AA11-01A	421	0	67	Tumor	TCGA-BRCA	unknown	unknown	unknown	m6Acluster C	unknown	>53	Alive	Gene.cluster A	-14.5318	Low m6Ascore
TCGA-AO-A03T-01A	2124	0	42	Tumor	TCGA-BRCA	Positive	Positive	Negative	m6Acluster C	NO	<=53	Alive	Gene.cluster A	-11.4801	High m6Ascore
TCGA-AC-A3YI-01A	707	0	74	Tumor	TCGA-BRCA	unknown	unknown	unknown	m6Acluster A	unknown	>53	Alive	Gene.cluster C	-12.3837	High m6Ascore
TCGA-LL-A7T0-01A	376	0	70	Tumor	TCGA-BRCA	unknown	unknown	unknown	m6Acluster B	unknown	>53	Alive	Gene.cluster A	-11.9539	High m6Ascore
TCGA-BH-A0DH-01A	1156	0	63	Tumor	TCGA-BRCA	Positive	Positive	Negative	m6Acluster A	NO	>53	Alive	Gene.cluster A	-16.9208	Low m6Ascore
TCGA-AC-A8OQ-01A	34	0	72	Tumor	TCGA-BRCA	unknown	unknown	unknown	m6Acluster A	unknown	>53	Alive	Gene.cluster B	-8.58219	High m6Ascore
TCGA-C8-A12N-01A	358	0	58	Tumor	TCGA-BRCA	Positive	Positive	Negative	m6Acluster A	NO	>53	Alive	Gene.cluster A	-14.3291	Low m6Ascore
TCGA-AO-A03U-01B	1793	1	31	Tumor	TCGA-BRCA	Negative	Negative	Negative	m6Acluster C	YES	<=53	Dead	Gene.cluster C	-11.8353	High m6Ascore
TCGA-AO-A0J2-01A	997	0	41	Tumor	TCGA-BRCA	Negative	Negative	Negative	m6Acluster A	YES	<=53	Alive	Gene.cluster B	-8.68468	High m6Ascore
TCGA-D8-A27R-01A	307	0	41	Tumor	TCGA-BRCA	Positive	Positive	Negative	m6Acluster B	NO	<=53	Alive	Gene.cluster A	-11.6106	High m6Ascore
TCGA-A2-A0EU-01A	1043	0	79	Tumor	TCGA-BRCA	Positive	Positive	Negative	m6Acluster B	NO	>53	Alive	Gene.cluster A	-14.4729	Low m6Ascore
TCGA-AO-A12D-01A	2515	0	43	Tumor	TCGA-BRCA	Negative	Negative	Positive	m6Acluster C	NO	<=53	Alive	Gene.cluster B	-11.2348	High m6Ascore
TCGA-D8-A1XT-01A	506	0	61	Tumor	TCGA-BRCA	Negative	Negative	Positive	m6Acluster C	NO	>53	Alive	Gene.cluster B	-11.475	High m6Ascore
TCGA-A2-A0CW-01A	3283	0	67	Tumor	TCGA-BRCA	Positive	Positive	Negative	m6Acluster A	NO	>53	Alive	Gene.cluster A	-11.4262	High m6Ascore
TCGA-E2-A10F-01A	878	0	47	Tumor	TCGA-BRCA	Positive	Positive	Negative	m6Acluster C	NO	<=53	Alive	Gene.cluster A	-15.2926	Low m6Ascore
TCGA-BH-A0E7-01A	1363	0	79	Tumor	TCGA-BRCA	Positive	Positive	Negative	m6Acluster B	NO	>53	Alive	Gene.cluster A	-15.6252	Low m6Ascore
TCGA-D8-A1XG-01A	448	0	86	Tumor	TCGA-BRCA	Positive	Negative	Negative	m6Acluster C	NO	>53	Alive	Gene.cluster A	-13.2992	High m6Ascore
TCGA-E9-A1N8-01A	1039	0	48	Tumor	TCGA-BRCA	Negative	unknown	Negative	m6Acluster B	unknown	<=53	Alive	Gene.cluster B	-6.34682	High m6Ascore
TCGA-E2-A2P5-01A	821	1	78	Tumor	TCGA-BRCA	unknown	unknown	unknown	m6Acluster A	unknown	>53	Dead	Gene.cluster A	-11.1062	High m6Ascore
TCGA-C8-A278-01A	297	0	61	Tumor	TCGA-BRCA	Negative	Negative	Positive	m6Acluster A	NO	>53	Alive	Gene.cluster B	-9.14125	High m6Ascore
TCGA-A8-A08R-01A	30	0	52	Tumor	TCGA-BRCA	Negative	Negative	Negative	m6Acluster B	YES	<=53	Alive	Gene.cluster B	-6.80105	High m6Ascore
TCGA-E2-A15A-01A	710	0	45	Tumor	TCGA-BRCA	Positive	Positive	Negative	m6Acluster B	NO	<=53	Alive	Gene.cluster A	-11.763	High m6Ascore
TCGA-D8-A1JT-01A	405	0	70	Tumor	TCGA-BRCA	Positive	Positive	Negative	m6Acluster A	NO	>53	Alive	Gene.cluster A	-15.3974	Low m6Ascore
TCGA-D8-A142-01A	425	0	74	Tumor	TCGA-BRCA	Negative	Negative	Negative	m6Acluster B	YES	>53	Alive	Gene.cluster B	-9.0112	High m6Ascore
TCGA-A2-A3Y0-01A	1546	0	57	Tumor	TCGA-BRCA	unknown	unknown	unknown	m6Acluster B	unknown	>53	Alive	Gene.cluster B	-6.07315	High m6Ascore
TCGA-AQ-A0Y5-01A	172	1	70	Tumor	TCGA-BRCA	Positive	Positive	Positive	m6Acluster C	NO	>53	Dead	Gene.cluster C	-10.6021	High m6Ascore
TCGA-A8-A07W-01A	304	0	76	Tumor	TCGA-BRCA	Positive	Positive	Negative	m6Acluster B	NO	>53	Alive	Gene.cluster A	-10.2349	High m6Ascore
TCGA-A1-A0SM-01A	242	0	77	Tumor	TCGA-BRCA	Positive	Negative	Positive	m6Acluster B	NO	>53	Alive	Gene.cluster A	-16.134	Low m6Ascore
TCGA-AC-A3EH-01A	197	1	79	Tumor	TCGA-BRCA	unknown	unknown	unknown	m6Acluster A	unknown	>53	Dead	Gene.cluster A	-11.5312	High m6Ascore
TCGA-MS-A51U-01A	681	0	44	Tumor	TCGA-BRCA	unknown	unknown	unknown	m6Acluster C	unknown	<=53	Alive	Gene.cluster C	-16.1753	Low m6Ascore
TCGA-AR-A24K-01A	1548	0	46	Tumor	TCGA-BRCA	Positive	Positive	Negative	m6Acluster C	NO	<=53	Alive	Gene.cluster A	-12.6552	High m6Ascore
TCGA-AC-A2BM-01A	3022	0	41	Tumor	TCGA-BRCA	unknown	unknown	unknown	m6Acluster B	unknown	<=53	Alive	Gene.cluster A	-16.3266	Low m6Ascore
TCGA-A2-A3XY-01A	1093	1	49	Tumor	TCGA-BRCA	unknown	unknown	unknown	m6Acluster A	unknown	<=53	Dead	Gene.cluster B	-8.28216	High m6Ascore
TCGA-E2-A14W-01A	974	0	78	Tumor	TCGA-BRCA	Positive	Positive	Positive	m6Acluster C	NO	>53	Alive	Gene.cluster A	-13.599	Low m6Ascore
TCGA-BH-A1F8-01A	1	1	90	Tumor	TCGA-BRCA	Positive	Positive	Negative	m6Acluster C	NO	>53	Dead	Gene.cluster A	-12.0538	High m6Ascore
TCGA-E9-A1RA-01A	1369	0	48	Tumor	TCGA-BRCA	unknown	unknown	Negative	m6Acluster A	unknown	<=53	Alive	Gene.cluster A	-13.3279	Low m6Ascore
TCGA-A8-A0A6-01A	640	0	64	Tumor	TCGA-BRCA	Positive	Positive	Negative	m6Acluster B	NO	>53	Alive	Gene.cluster C	-14.5754	Low m6Ascore
TCGA-AC-A7VC-01A	1	0	56	Tumor	TCGA-BRCA	unknown	unknown	unknown	m6Acluster A	unknown	>53	Alive	Gene.cluster B	-9.2494	High m6Ascore
TCGA-C8-A27B-01A	439	0	48	Tumor	TCGA-BRCA	Negative	Negative	Negative	m6Acluster B	YES	<=53	Alive	Gene.cluster B	-7.33515	High m6Ascore
TCGA-S3-AA15-01A	525	0	51	Tumor	TCGA-BRCA	unknown	unknown	unknown	m6Acluster A	unknown	<=53	Alive	Gene.cluster B	-9.46002	High m6Ascore
TCGA-BH-A1ES-01A	3462	1	35	Tumor	TCGA-BRCA	Positive	Positive	Negative	m6Acluster A	NO	<=53	Dead	Gene.cluster A	-14.6446	Low m6Ascore
TCGA-E2-A1L6-01A	1648	0	44	Tumor	TCGA-BRCA	Positive	Positive	Negative	m6Acluster C	NO	<=53	Alive	Gene.cluster C	-16.9097	Low m6Ascore
TCGA-E9-A1R0-01A	860	0	58	Tumor	TCGA-BRCA	unknown	unknown	Negative	m6Acluster A	unknown	>53	Alive	Gene.cluster A	-16.0272	Low m6Ascore
TCGA-BH-A0B6-01A	2483	0	47	Tumor	TCGA-BRCA	unknown	unknown	unknown	m6Acluster B	unknown	<=53	Alive	Gene.cluster C	-14.6935	Low m6Ascore
TCGA-B6-A0RN-01A	8008	0	60	Tumor	TCGA-BRCA	Negative	Negative	Negative	m6Acluster B	YES	>53	Alive	Gene.cluster C	-13.8451	Low m6Ascore
TCGA-A8-A09W-01A	30	0	70	Tumor	TCGA-BRCA	Positive	Positive	Negative	m6Acluster A	NO	>53	Alive	Gene.cluster A	-12.4218	High m6Ascore
TCGA-EW-A1P3-01A	1611	0	48	Tumor	TCGA-BRCA	Positive	Positive	Negative	m6Acluster A	NO	<=53	Alive	Gene.cluster A	-12.9277	High m6Ascore
TCGA-A2-A0T6-01A	575	0	50	Tumor	TCGA-BRCA	Positive	Positive	Negative	m6Acluster C	NO	<=53	Alive	Gene.cluster C	-14.3291	Low m6Ascore
TCGA-A7-A5ZW-01A	326	0	47	Tumor	TCGA-BRCA	unknown	unknown	unknown	m6Acluster A	unknown	<=53	Alive	Gene.cluster C	-17.2591	Low m6Ascore
TCGA-BH-A203-01A	1174	1	78	Tumor	TCGA-BRCA	unknown	unknown	unknown	m6Acluster B	unknown	>53	Dead	Gene.cluster B	-10.918	High m6Ascore
GSM519722	3022	0	NA	Tumor	GSE20713	Negative	unknown	Positive	m6Acluster A	NO	NA	Alive	Gene.cluster B	-10.4746	High m6Ascore
GSM519723	1237	1	NA	Tumor	GSE20713	Negative	unknown	Positive	m6Acluster A	NO	NA	Dead	Gene.cluster A	-11.1509	High m6Ascore
GSM519724	3154	0	NA	Tumor	GSE20713	Negative	unknown	Positive	m6Acluster A	NO	NA	Alive	Gene.cluster B	-11.577	High m6Ascore
GSM519725	3066	0	NA	Tumor	GSE20713	Positive	unknown	Negative	m6Acluster B	NO	NA	Alive	Gene.cluster C	-16.6598	Low m6Ascore
GSM519726	2632	0	NA	Tumor	GSE20713	Negative	unknown	Positive	m6Acluster B	NO	NA	Alive	Gene.cluster B	-9.87571	High m6Ascore
GSM519727	2989	0	NA	Tumor	GSE20713	Negative	unknown	Negative	m6Acluster B	unknown	NA	Alive	Gene.cluster B	-10.436	High m6Ascore
GSM519728	920	1	NA	Tumor	GSE20713	Negative	unknown	Positive	m6Acluster B	NO	NA	Dead	Gene.cluster A	-12.8303	High m6Ascore
GSM519729	3037	0	NA	Tumor	GSE20713	Negative	unknown	Negative	m6Acluster A	unknown	NA	Alive	Gene.cluster B	-6.99925	High m6Ascore
GSM519730	3219	0	NA	Tumor	GSE20713	Positive	unknown	Negative	m6Acluster A	NO	NA	Alive	Gene.cluster A	-18.2712	Low m6Ascore
GSM519731	3296	0	NA	Tumor	GSE20713	Positive	unknown	Negative	m6Acluster C	NO	NA	Alive	Gene.cluster A	-15.1289	Low m6Ascore
GSM519732	3278	0	NA	Tumor	GSE20713	Positive	unknown	Negative	m6Acluster C	NO	NA	Alive	Gene.cluster A	-19.9887	Low m6Ascore
GSM519733	2778	0	NA	Tumor	GSE20713	Positive	unknown	Negative	m6Acluster A	NO	NA	Alive	Gene.cluster A	-12.3033	High m6Ascore
GSM519734	3449	0	NA	Tumor	GSE20713	Negative	unknown	Negative	m6Acluster C	unknown	NA	Alive	Gene.cluster B	-7.70428	High m6Ascore
GSM519735	3402	0	NA	Tumor	GSE20713	Positive	unknown	Negative	m6Acluster C	NO	NA	Alive	Gene.cluster C	-19.6171	Low m6Ascore
GSM519736	2216	0	NA	Tumor	GSE20713	Positive	unknown	Negative	m6Acluster C	NO	NA	Alive	Gene.cluster C	-19.3684	Low m6Ascore
GSM519737	1486	1	NA	Tumor	GSE20713	Negative	unknown	Negative	m6Acluster A	unknown	NA	Dead	Gene.cluster C	-16.4002	Low m6Ascore
GSM519738	3227	0	NA	Tumor	GSE20713	Positive	unknown	Negative	m6Acluster B	NO	NA	Alive	Gene.cluster B	-9.38117	High m6Ascore
GSM519739	2931	0	NA	Tumor	GSE20713	Positive	unknown	Negative	m6Acluster A	NO	NA	Alive	Gene.cluster A	-13.7937	Low m6Ascore
GSM519740	675	0	NA	Tumor	GSE20713	Positive	unknown	Positive	m6Acluster A	NO	NA	Alive	Gene.cluster A	-11.835	High m6Ascore
GSM519741	1821	1	NA	Tumor	GSE20713	Negative	unknown	Negative	m6Acluster B	unknown	NA	Dead	Gene.cluster B	-9.20693	High m6Ascore
GSM519742	2088	0	NA	Tumor	GSE20713	Positive	unknown	Negative	m6Acluster B	NO	NA	Alive	Gene.cluster A	-13.7848	Low m6Ascore
GSM519743	2716	0	NA	Tumor	GSE20713	Positive	unknown	Negative	m6Acluster C	NO	NA	Alive	Gene.cluster A	-16.8506	Low m6Ascore
GSM519744	1635	0	NA	Tumor	GSE20713	Positive	unknown	Negative	m6Acluster A	NO	NA	Alive	Gene.cluster A	-15.4389	Low m6Ascore
GSM519745	2690	0	NA	Tumor	GSE20713	Negative	unknown	Negative	m6Acluster B	unknown	NA	Alive	Gene.cluster B	-6.75835	High m6Ascore
GSM519746	2851	0	NA	Tumor	GSE20713	Negative	unknown	Negative	m6Acluster C	unknown	NA	Alive	Gene.cluster B	-8.28203	High m6Ascore
GSM519747	2862	0	NA	Tumor	GSE20713	Negative	unknown	Negative	m6Acluster B	unknown	NA	Alive	Gene.cluster B	-7.47151	High m6Ascore
GSM519748	1376	1	NA	Tumor	GSE20713	Positive	unknown	Negative	m6Acluster C	NO	NA	Dead	Gene.cluster A	-13.6203	Low m6Ascore
GSM519749	1927	1	NA	Tumor	GSE20713	Positive	unknown	Positive	m6Acluster B	NO	NA	Dead	Gene.cluster A	-13.0691	High m6Ascore
GSM519750	3062	0	NA	Tumor	GSE20713	Positive	unknown	Negative	m6Acluster B	NO	NA	Alive	Gene.cluster A	-13.4243	Low m6Ascore
GSM519751	2785	0	NA	Tumor	GSE20713	Negative	unknown	Positive	m6Acluster C	NO	NA	Alive	Gene.cluster C	-9.58553	High m6Ascore
GSM519752	555	1	NA	Tumor	GSE20713	Positive	unknown	Negative	m6Acluster B	NO	NA	Dead	Gene.cluster B	-11.7643	High m6Ascore
GSM519753	2613	0	NA	Tumor	GSE20713	Negative	unknown	Negative	m6Acluster C	unknown	NA	Alive	Gene.cluster B	-9.69562	High m6Ascore
GSM519754	2639	0	NA	Tumor	GSE20713	Positive	unknown	Negative	m6Acluster B	NO	NA	Alive	Gene.cluster A	-14.1374	Low m6Ascore
GSM519755	2449	0	NA	Tumor	GSE20713	Positive	unknown	Negative	m6Acluster B	NO	NA	Alive	Gene.cluster B	-8.3648	High m6Ascore
GSM519756	2321	0	NA	Tumor	GSE20713	Positive	unknown	Positive	m6Acluster A	NO	NA	Alive	Gene.cluster A	-11.792	High m6Ascore
GSM519757	2391	0	NA	Tumor	GSE20713	Negative	unknown	Negative	m6Acluster B	unknown	NA	Alive	Gene.cluster C	-12.1597	High m6Ascore
GSM519758	1818	1	NA	Tumor	GSE20713	Negative	unknown	Positive	m6Acluster C	NO	NA	Dead	Gene.cluster A	-16.6389	Low m6Ascore
GSM519759	2263	0	NA	Tumor	GSE20713	Negative	unknown	Negative	m6Acluster C	unknown	NA	Alive	Gene.cluster B	-11.2287	High m6Ascore
GSM519760	2267	0	NA	Tumor	GSE20713	Negative	unknown	Negative	m6Acluster B	unknown	NA	Alive	Gene.cluster B	-8.72908	High m6Ascore
GSM519761	2029	1	NA	Tumor	GSE20713	Negative	unknown	Negative	m6Acluster C	unknown	NA	Dead	Gene.cluster C	-20.0977	Low m6Ascore
GSM519762	2493	0	NA	Tumor	GSE20713	Positive	unknown	Negative	m6Acluster C	NO	NA	Alive	Gene.cluster C	-20.6962	Low m6Ascore
GSM519763	2584	0	NA	Tumor	GSE20713	Positive	unknown	Negative	m6Acluster A	NO	NA	Alive	Gene.cluster C	-17.6968	Low m6Ascore
GSM519764	2354	1	NA	Tumor	GSE20713	Positive	unknown	Positive	m6Acluster C	NO	NA	Dead	Gene.cluster C	-12.6651	High m6Ascore
GSM519765	2270	0	NA	Tumor	GSE20713	Negative	unknown	Negative	m6Acluster C	unknown	NA	Alive	Gene.cluster C	-16.9674	Low m6Ascore
GSM519767	719	1	NA	Tumor	GSE20713	Positive	unknown	Positive	m6Acluster C	NO	NA	Dead	Gene.cluster A	-13.528	Low m6Ascore
GSM519768	5139	0	NA	Tumor	GSE20713	Negative	unknown	Negative	m6Acluster B	unknown	NA	Alive	Gene.cluster B	-9.53519	High m6Ascore
GSM519769	2252	0	NA	Tumor	GSE20713	Positive	unknown	Positive	m6Acluster B	NO	NA	Alive	Gene.cluster A	-11.7311	High m6Ascore
GSM519770	1084	1	NA	Tumor	GSE20713	Positive	unknown	Negative	m6Acluster A	NO	NA	Dead	Gene.cluster A	-13.5817	Low m6Ascore
GSM519771	4672	0	NA	Tumor	GSE20713	Negative	unknown	Negative	m6Acluster A	unknown	NA	Alive	Gene.cluster A	-14.7494	Low m6Ascore
GSM519772	2172	0	NA	Tumor	GSE20713	Positive	unknown	Negative	m6Acluster C	NO	NA	Alive	Gene.cluster C	-14.6492	Low m6Ascore
GSM519773	1672	1	NA	Tumor	GSE20713	Positive	unknown	Negative	m6Acluster A	NO	NA	Dead	Gene.cluster A	-14.0261	Low m6Ascore
GSM519774	2095	0	NA	Tumor	GSE20713	Negative	unknown	Negative	m6Acluster B	unknown	NA	Alive	Gene.cluster B	-7.59906	High m6Ascore
GSM519775	1650	0	NA	Tumor	GSE20713	Negative	unknown	Negative	m6Acluster A	unknown	NA	Alive	Gene.cluster B	-11.7173	High m6Ascore
GSM519776	2234	0	NA	Tumor	GSE20713	Positive	unknown	Positive	m6Acluster B	NO	NA	Alive	Gene.cluster A	-18.6182	Low m6Ascore
GSM519777	577	1	NA	Tumor	GSE20713	Negative	unknown	Positive	m6Acluster A	NO	NA	Dead	Gene.cluster B	-12.5165	High m6Ascore
GSM519778	1982	0	NA	Tumor	GSE20713	Negative	unknown	Positive	m6Acluster A	NO	NA	Alive	Gene.cluster C	-12.0245	High m6Ascore
GSM519779	1945	1	NA	Tumor	GSE20713	Negative	unknown	Negative	m6Acluster B	unknown	NA	Dead	Gene.cluster B	-11.5058	High m6Ascore
GSM519780	2584	0	NA	Tumor	GSE20713	Negative	unknown	Negative	m6Acluster C	unknown	NA	Alive	Gene.cluster C	-14.4139	Low m6Ascore
GSM519781	5095	0	NA	Tumor	GSE20713	unknown	unknown	Positive	m6Acluster B	NO	NA	Alive	Gene.cluster A	-10.8715	High m6Ascore
GSM519782	4887	0	NA	Tumor	GSE20713	Negative	unknown	Positive	m6Acluster B	NO	NA	Alive	Gene.cluster A	-15.319	Low m6Ascore
GSM519783	2894	0	NA	Tumor	GSE20713	Positive	unknown	Negative	m6Acluster A	NO	NA	Alive	Gene.cluster A	-13.7137	Low m6Ascore
GSM519784	2708	1	NA	Tumor	GSE20713	Negative	unknown	Negative	m6Acluster B	unknown	NA	Dead	Gene.cluster B	-7.9447	High m6Ascore
GSM519785	2150	1	NA	Tumor	GSE20713	Negative	unknown	Positive	m6Acluster C	NO	NA	Dead	Gene.cluster C	-10.944	High m6Ascore
GSM519786	4132	1	NA	Tumor	GSE20713	Negative	unknown	Positive	m6Acluster B	NO	NA	Dead	Gene.cluster A	-11.8505	High m6Ascore
GSM519787	701	1	NA	Tumor	GSE20713	Negative	unknown	Negative	m6Acluster A	unknown	NA	Dead	Gene.cluster B	-7.06388	High m6Ascore
GSM519788	2329	0	NA	Tumor	GSE20713	Positive	unknown	Negative	m6Acluster C	NO	NA	Alive	Gene.cluster C	-16.9977	Low m6Ascore
GSM519789	2175	0	NA	Tumor	GSE20713	Positive	unknown	Negative	m6Acluster C	NO	NA	Alive	Gene.cluster C	-16.9906	Low m6Ascore
GSM519790	4909	0	NA	Tumor	GSE20713	Positive	unknown	Negative	m6Acluster A	NO	NA	Alive	Gene.cluster C	-14.8409	Low m6Ascore
GSM519791	2884	0	NA	Tumor	GSE20713	Positive	unknown	Negative	m6Acluster C	NO	NA	Alive	Gene.cluster C	-15.2346	Low m6Ascore
GSM519792	4898	0	NA	Tumor	GSE20713	Negative	unknown	Positive	m6Acluster B	NO	NA	Alive	Gene.cluster B	-8.21521	High m6Ascore
GSM519793	4844	0	NA	Tumor	GSE20713	Negative	unknown	Negative	m6Acluster C	unknown	NA	Alive	Gene.cluster A	-19.5131	Low m6Ascore
GSM519794	3190	0	NA	Tumor	GSE20713	Negative	unknown	Negative	m6Acluster A	unknown	NA	Alive	Gene.cluster A	-12.3734	High m6Ascore
GSM519795	1956	0	NA	Tumor	GSE20713	Positive	unknown	Negative	m6Acluster C	NO	NA	Alive	Gene.cluster C	-15.1646	Low m6Ascore
GSM519796	4530	0	NA	Tumor	GSE20713	Positive	unknown	Negative	m6Acluster A	NO	NA	Alive	Gene.cluster A	-15.2562	Low m6Ascore
GSM519797	318	1	NA	Tumor	GSE20713	Negative	unknown	Positive	m6Acluster B	NO	NA	Dead	Gene.cluster B	-9.1496	High m6Ascore
GSM519798	2891	1	NA	Tumor	GSE20713	Positive	unknown	Negative	m6Acluster A	NO	NA	Dead	Gene.cluster C	-16.6113	Low m6Ascore
GSM519799	3949	0	NA	Tumor	GSE20713	Negative	unknown	Positive	m6Acluster B	NO	NA	Alive	Gene.cluster B	-10.0596	High m6Ascore
GSM519800	442	0	NA	Tumor	GSE20713	Negative	unknown	Positive	m6Acluster A	NO	NA	Alive	Gene.cluster A	-9.88857	High m6Ascore
GSM519801	1785	1	NA	Tumor	GSE20713	Negative	unknown	Negative	m6Acluster C	unknown	NA	Dead	Gene.cluster A	-12.2535	High m6Ascore
GSM519802	3570	0	NA	Tumor	GSE20713	Negative	unknown	Negative	m6Acluster B	unknown	NA	Alive	Gene.cluster B	-8.20252	High m6Ascore
GSM519803	1712	1	NA	Tumor	GSE20713	Negative	unknown	Negative	m6Acluster C	unknown	NA	Dead	Gene.cluster A	-13.3168	High m6Ascore
GSM519804	3646	0	NA	Tumor	GSE20713	Positive	unknown	Negative	m6Acluster A	NO	NA	Alive	Gene.cluster C	-17.6238	Low m6Ascore
GSM519805	2037	0	NA	Tumor	GSE20713	Positive	unknown	Positive	m6Acluster C	NO	NA	Alive	Gene.cluster C	-12.1682	High m6Ascore
GSM519806	1296	1	NA	Tumor	GSE20713	Negative	unknown	Positive	m6Acluster C	NO	NA	Dead	Gene.cluster B	-9.66597	High m6Ascore
GSM519807	1891	1	NA	Tumor	GSE20713	Positive	unknown	Negative	m6Acluster C	NO	NA	Dead	Gene.cluster C	-18.2065	Low m6Ascore
GSM519808	2259	0	NA	Tumor	GSE20713	Negative	unknown	Negative	m6Acluster B	unknown	NA	Alive	Gene.cluster B	-10.0339	High m6Ascore
GSM519809	2230	0	NA	Tumor	GSE20713	Positive	unknown	Negative	m6Acluster C	NO	NA	Alive	Gene.cluster C	-16.2905	Low m6Ascore
GSM519810	2226	0	NA	Tumor	GSE20713	Positive	unknown	Negative	m6Acluster C	NO	NA	Alive	Gene.cluster C	-18.0049	Low m6Ascore
GSM1045208	3026	0	74	Tumor	GSE42568	Positive	unknown	unknown	m6Acluster A	NO	>53	Alive	Gene.cluster A	-12.8108	High m6Ascore
GSM1045209	755	1	67	Tumor	GSE42568	Positive	unknown	unknown	m6Acluster C	NO	>53	Dead	Gene.cluster A	-16.3235	Low m6Ascore
GSM1045210	3014	0	53	Tumor	GSE42568	Positive	unknown	unknown	m6Acluster B	NO	<=53	Alive	Gene.cluster A	-12.6568	High m6Ascore
GSM1045211	1726	1	44	Tumor	GSE42568	Positive	unknown	unknown	m6Acluster A	NO	<=53	Dead	Gene.cluster A	-10.9799	High m6Ascore
GSM1045212	2225	0	51	Tumor	GSE42568	Negative	unknown	unknown	m6Acluster C	unknown	<=53	Alive	Gene.cluster B	-7.41647	High m6Ascore
GSM1045213	285	1	42	Tumor	GSE42568	Negative	unknown	unknown	m6Acluster C	unknown	<=53	Dead	Gene.cluster C	-12.8383	High m6Ascore
GSM1045214	2138	0	52	Tumor	GSE42568	Negative	unknown	unknown	m6Acluster A	unknown	<=53	Alive	Gene.cluster B	-10.4826	High m6Ascore
GSM1045215	2449	0	43	Tumor	GSE42568	Positive	unknown	unknown	m6Acluster B	NO	<=53	Alive	Gene.cluster A	-13.0399	High m6Ascore
GSM1045216	2456	1	46	Tumor	GSE42568	Negative	unknown	unknown	m6Acluster A	unknown	<=53	Dead	Gene.cluster B	-9.74053	High m6Ascore
GSM1045217	420	1	79	Tumor	GSE42568	Positive	unknown	unknown	m6Acluster A	NO	>53	Dead	Gene.cluster C	-9.00843	High m6Ascore
GSM1045218	1110	1	57	Tumor	GSE42568	Negative	unknown	unknown	m6Acluster B	unknown	>53	Dead	Gene.cluster B	-7.86679	High m6Ascore
GSM1045219	488	1	54	Tumor	GSE42568	Negative	unknown	unknown	m6Acluster B	unknown	>53	Dead	Gene.cluster B	-9.6388	High m6Ascore
GSM1045220	2718	0	49	Tumor	GSE42568	Negative	unknown	unknown	m6Acluster A	unknown	<=53	Alive	Gene.cluster A	-9.73916	High m6Ascore
GSM1045221	767	1	51	Tumor	GSE42568	Negative	unknown	unknown	m6Acluster A	unknown	<=53	Dead	Gene.cluster B	-7.96995	High m6Ascore
GSM1045222	1216	1	64	Tumor	GSE42568	Negative	unknown	unknown	m6Acluster B	unknown	>53	Dead	Gene.cluster B	-10.9143	High m6Ascore
GSM1045223	2462	0	44	Tumor	GSE42568	Negative	unknown	unknown	m6Acluster C	unknown	<=53	Alive	Gene.cluster C	-16.7444	Low m6Ascore
GSM1045224	1862	1	76	Tumor	GSE42568	Positive	unknown	unknown	m6Acluster C	NO	>53	Dead	Gene.cluster A	-12.4558	High m6Ascore
GSM1045225	1223	1	69	Tumor	GSE42568	Positive	unknown	unknown	m6Acluster C	NO	>53	Dead	Gene.cluster B	-7.91616	High m6Ascore
GSM1045226	3019	0	82	Tumor	GSE42568	Positive	unknown	unknown	m6Acluster C	NO	>53	Alive	Gene.cluster C	-17.1274	Low m6Ascore
GSM1045227	155	1	73	Tumor	GSE42568	Positive	unknown	unknown	m6Acluster A	NO	>53	Dead	Gene.cluster B	-8.43312	High m6Ascore
GSM1045228	947	0	77	Tumor	GSE42568	Positive	unknown	unknown	m6Acluster C	NO	>53	Alive	Gene.cluster C	-14.9685	Low m6Ascore
GSM1045229	552	1	65	Tumor	GSE42568	Negative	unknown	unknown	m6Acluster A	unknown	>53	Dead	Gene.cluster B	-11.5084	High m6Ascore
GSM1045230	2903	0	48	Tumor	GSE42568	Negative	unknown	unknown	m6Acluster B	unknown	<=53	Alive	Gene.cluster A	-18.4908	Low m6Ascore
GSM1045231	2438	0	58	Tumor	GSE42568	Negative	unknown	unknown	m6Acluster B	unknown	>53	Alive	Gene.cluster B	-9.40146	High m6Ascore
GSM1045232	1627	0	39	Tumor	GSE42568	Positive	unknown	unknown	m6Acluster B	NO	<=53	Alive	Gene.cluster A	-9.43068	High m6Ascore
GSM1045233	1708	1	50	Tumor	GSE42568	Positive	unknown	unknown	m6Acluster C	NO	<=53	Dead	Gene.cluster A	-14.9006	Low m6Ascore
GSM1045234	2237	0	80	Tumor	GSE42568	Negative	unknown	unknown	m6Acluster B	unknown	>53	Alive	Gene.cluster B	-12.0409	High m6Ascore
GSM1045235	845	1	59	Tumor	GSE42568	Positive	unknown	unknown	m6Acluster C	NO	>53	Dead	Gene.cluster A	-13.5404	Low m6Ascore
GSM1045236	2957	0	46	Tumor	GSE42568	Negative	unknown	unknown	m6Acluster C	unknown	<=53	Alive	Gene.cluster C	-16.3336	Low m6Ascore
GSM1045237	913	1	51	Tumor	GSE42568	Negative	unknown	unknown	m6Acluster A	unknown	<=53	Dead	Gene.cluster B	-10.6423	High m6Ascore
GSM1045238	138	1	51	Tumor	GSE42568	Positive	unknown	unknown	m6Acluster A	NO	<=53	Dead	Gene.cluster A	-15.624	Low m6Ascore
GSM1045239	1058	1	43	Tumor	GSE42568	Negative	unknown	unknown	m6Acluster B	unknown	<=53	Dead	Gene.cluster C	-11.1035	High m6Ascore
GSM1045240	2759	0	73	Tumor	GSE42568	Negative	unknown	unknown	m6Acluster A	unknown	>53	Alive	Gene.cluster C	-14.6092	Low m6Ascore
GSM1045241	2764	0	54	Tumor	GSE42568	Positive	unknown	unknown	m6Acluster A	NO	>53	Alive	Gene.cluster A	-13.4043	Low m6Ascore
GSM1045242	1157	1	73	Tumor	GSE42568	Positive	unknown	unknown	m6Acluster C	NO	>53	Dead	Gene.cluster B	-8.3759	High m6Ascore
GSM1045243	546	0	55	Tumor	GSE42568	Positive	unknown	unknown	m6Acluster C	NO	>53	Alive	Gene.cluster C	-13.2976	High m6Ascore
GSM1045244	2582	0	53	Tumor	GSE42568	Positive	unknown	unknown	m6Acluster A	NO	<=53	Alive	Gene.cluster A	-14.9977	Low m6Ascore
GSM1045245	2460	0	55	Tumor	GSE42568	Positive	unknown	unknown	m6Acluster B	NO	>53	Alive	Gene.cluster C	-13.7545	Low m6Ascore
GSM1045246	1338	1	48	Tumor	GSE42568	Positive	unknown	unknown	m6Acluster C	NO	<=53	Dead	Gene.cluster A	-14.5326	Low m6Ascore
GSM1045247	2626	0	60	Tumor	GSE42568	Positive	unknown	unknown	m6Acluster C	NO	>53	Alive	Gene.cluster A	-22.1702	Low m6Ascore
GSM1045248	2948	0	53	Tumor	GSE42568	Positive	unknown	unknown	m6Acluster A	NO	<=53	Alive	Gene.cluster B	-6.57169	High m6Ascore
GSM1045249	2416	0	63	Tumor	GSE42568	Negative	unknown	unknown	m6Acluster C	unknown	>53	Alive	Gene.cluster A	-19.4167	Low m6Ascore
GSM1045250	194	1	43	Tumor	GSE42568	unknown	unknown	unknown	m6Acluster A	unknown	<=53	Dead	Gene.cluster B	-7.19343	High m6Ascore
GSM1045251	2897	0	72	Tumor	GSE42568	Positive	unknown	unknown	m6Acluster C	NO	>53	Alive	Gene.cluster C	-16.7241	Low m6Ascore
GSM1045252	2899	0	54	Tumor	GSE42568	Negative	unknown	unknown	m6Acluster C	unknown	>53	Alive	Gene.cluster C	-12.3574	High m6Ascore
GSM1045253	2829	0	74	Tumor	GSE42568	Positive	unknown	unknown	m6Acluster C	NO	>53	Alive	Gene.cluster A	-16.1625	Low m6Ascore
GSM1045254	2785	0	79	Tumor	GSE42568	Positive	unknown	unknown	m6Acluster C	NO	>53	Alive	Gene.cluster A	-14.7284	Low m6Ascore
GSM1045255	2740	0	74	Tumor	GSE42568	Positive	unknown	unknown	m6Acluster B	NO	>53	Alive	Gene.cluster A	-17.0121	Low m6Ascore
GSM1045256	1235	0	74	Tumor	GSE42568	Positive	unknown	unknown	m6Acluster B	NO	>53	Alive	Gene.cluster A	-18.4952	Low m6Ascore
GSM1045257	2092	1	75	Tumor	GSE42568	Positive	unknown	unknown	m6Acluster B	NO	>53	Dead	Gene.cluster A	-15.0714	Low m6Ascore
GSM1045258	2535	0	68	Tumor	GSE42568	Positive	unknown	unknown	m6Acluster C	NO	>53	Alive	Gene.cluster A	-13.1833	High m6Ascore
GSM1045259	2211	0	50	Tumor	GSE42568	Positive	unknown	unknown	m6Acluster A	NO	<=53	Alive	Gene.cluster A	-12.8967	High m6Ascore
GSM1045260	2275	1	70	Tumor	GSE42568	Positive	unknown	unknown	m6Acluster C	NO	>53	Dead	Gene.cluster A	-20.7367	Low m6Ascore
GSM1045261	390	1	31	Tumor	GSE42568	Negative	unknown	unknown	m6Acluster B	unknown	<=53	Dead	Gene.cluster B	-5.0688	High m6Ascore
GSM1045262	2184	0	71	Tumor	GSE42568	Positive	unknown	unknown	m6Acluster C	NO	>53	Alive	Gene.cluster A	-20.1476	Low m6Ascore
GSM1045263	919	1	61	Tumor	GSE42568	Positive	unknown	unknown	m6Acluster B	NO	>53	Dead	Gene.cluster B	-8.92916	High m6Ascore
GSM1045264	917	0	65	Tumor	GSE42568	Negative	unknown	unknown	m6Acluster B	unknown	>53	Alive	Gene.cluster B	-9.56888	High m6Ascore
GSM1045265	2758	0	67	Tumor	GSE42568	Positive	unknown	unknown	m6Acluster C	NO	>53	Alive	Gene.cluster C	-14.923	Low m6Ascore
GSM1045266	977	0	57	Tumor	GSE42568	Positive	unknown	unknown	m6Acluster A	NO	>53	Alive	Gene.cluster B	-10.423	High m6Ascore
GSM1045267	1997	0	69	Tumor	GSE42568	Positive	unknown	unknown	m6Acluster A	NO	>53	Alive	Gene.cluster C	-16.8952	Low m6Ascore
GSM1045268	1854	0	66	Tumor	GSE42568	Positive	unknown	unknown	m6Acluster C	NO	>53	Alive	Gene.cluster A	-13.2378	High m6Ascore
GSM1045269	1793	0	61	Tumor	GSE42568	Negative	unknown	unknown	m6Acluster A	unknown	>53	Alive	Gene.cluster B	-10.7109	High m6Ascore
GSM1045270	545	1	47	Tumor	GSE42568	Negative	unknown	unknown	m6Acluster B	unknown	<=53	Dead	Gene.cluster B	-6.77095	High m6Ascore
GSM1045271	1409	1	52	Tumor	GSE42568	Negative	unknown	unknown	m6Acluster B	unknown	<=53	Dead	Gene.cluster A	-11.2195	High m6Ascore
GSM1045272	2943	0	56	Tumor	GSE42568	Positive	unknown	unknown	m6Acluster C	NO	>53	Alive	Gene.cluster A	-17.0459	Low m6Ascore
GSM1045273	1044	1	60	Tumor	GSE42568	Positive	unknown	unknown	m6Acluster C	NO	>53	Dead	Gene.cluster A	-13.2804	High m6Ascore
GSM1045274	2489	0	51	Tumor	GSE42568	Positive	unknown	unknown	m6Acluster C	NO	<=53	Alive	Gene.cluster B	-7.76084	High m6Ascore
GSM1045275	1332	1	76	Tumor	GSE42568	unknown	unknown	unknown	m6Acluster B	unknown	>53	Dead	Gene.cluster B	-7.71142	High m6Ascore
GSM1045276	1915	1	59	Tumor	GSE42568	Positive	unknown	unknown	m6Acluster A	NO	>53	Dead	Gene.cluster A	-12.8855	High m6Ascore
GSM1045277	1950	0	48	Tumor	GSE42568	Positive	unknown	unknown	m6Acluster A	NO	<=53	Alive	Gene.cluster B	-8.96568	High m6Ascore
GSM1045278	1080	1	39	Tumor	GSE42568	Positive	unknown	unknown	m6Acluster B	NO	<=53	Dead	Gene.cluster C	-14.1063	Low m6Ascore
GSM1045279	2266	0	47	Tumor	GSE42568	Positive	unknown	unknown	m6Acluster B	NO	<=53	Alive	Gene.cluster C	-16.2168	Low m6Ascore
GSM1045280	1692	0	49	Tumor	GSE42568	Negative	unknown	unknown	m6Acluster C	unknown	<=53	Alive	Gene.cluster C	-16.3658	Low m6Ascore
GSM1045281	2302	0	47	Tumor	GSE42568	Negative	unknown	unknown	m6Acluster B	unknown	<=53	Alive	Gene.cluster A	-14.5534	Low m6Ascore
GSM1045282	365	1	68	Tumor	GSE42568	Negative	unknown	unknown	m6Acluster B	unknown	>53	Dead	Gene.cluster B	-10.5316	High m6Ascore
GSM1045283	2211	0	46	Tumor	GSE42568	Negative	unknown	unknown	m6Acluster C	unknown	<=53	Alive	Gene.cluster B	-11.1787	High m6Ascore
GSM1045284	2344	0	72	Tumor	GSE42568	Positive	unknown	unknown	m6Acluster A	NO	>53	Alive	Gene.cluster A	-13.3942	Low m6Ascore
GSM1045285	1864	0	67	Tumor	GSE42568	Positive	unknown	unknown	m6Acluster B	NO	>53	Alive	Gene.cluster B	-10.9234	High m6Ascore
GSM1045286	2484	0	68	Tumor	GSE42568	Positive	unknown	unknown	m6Acluster B	NO	>53	Alive	Gene.cluster A	-14.1584	Low m6Ascore
GSM1045287	526	1	68	Tumor	GSE42568	Negative	unknown	unknown	m6Acluster C	unknown	>53	Dead	Gene.cluster C	-11.0994	High m6Ascore
GSM1045288	2955	0	47	Tumor	GSE42568	Positive	unknown	unknown	m6Acluster B	NO	<=53	Alive	Gene.cluster A	-12.8594	High m6Ascore
GSM1045289	2650	0	45	Tumor	GSE42568	Negative	unknown	unknown	m6Acluster C	unknown	<=53	Alive	Gene.cluster C	-13.8865	Low m6Ascore
GSM1045290	2384	0	56	Tumor	GSE42568	Negative	unknown	unknown	m6Acluster B	unknown	>53	Alive	Gene.cluster C	-12.811	High m6Ascore
GSM1045291	2689	0	56	Tumor	GSE42568	Positive	unknown	unknown	m6Acluster C	NO	>53	Alive	Gene.cluster A	-11.2171	High m6Ascore
GSM1045292	2641	0	51	Tumor	GSE42568	Positive	unknown	unknown	m6Acluster C	NO	<=53	Alive	Gene.cluster C	-13.805	Low m6Ascore
GSM1045293	423	0	54	Tumor	GSE42568	Positive	unknown	unknown	m6Acluster B	NO	>53	Alive	Gene.cluster B	-8.08985	High m6Ascore
GSM1045294	1682	0	69	Tumor	GSE42568	Positive	unknown	unknown	m6Acluster A	NO	>53	Alive	Gene.cluster B	-8.71443	High m6Ascore
GSM1045295	2052	0	56	Tumor	GSE42568	Positive	unknown	unknown	m6Acluster B	NO	>53	Alive	Gene.cluster C	-16.3681	Low m6Ascore
GSM1045296	475	0	61	Tumor	GSE42568	Positive	unknown	unknown	m6Acluster B	NO	>53	Alive	Gene.cluster B	-7.21177	High m6Ascore
GSM1045297	2243	0	90	Tumor	GSE42568	Positive	unknown	unknown	m6Acluster C	NO	>53	Alive	Gene.cluster A	-20.9752	Low m6Ascore
GSM1045298	2197	0	74	Tumor	GSE42568	Positive	unknown	unknown	m6Acluster B	NO	>53	Alive	Gene.cluster B	-9.60664	High m6Ascore
GSM1045299	2576	0	61	Tumor	GSE42568	Positive	unknown	unknown	m6Acluster C	NO	>53	Alive	Gene.cluster A	-14.6354	Low m6Ascore
GSM1045300	2556	0	57	Tumor	GSE42568	Positive	unknown	unknown	m6Acluster A	NO	>53	Alive	Gene.cluster A	-14.8188	Low m6Ascore
GSM1045301	2225	0	56	Tumor	GSE42568	Positive	unknown	unknown	m6Acluster A	NO	>53	Alive	Gene.cluster C	-14.1735	Low m6Ascore
GSM1045302	2022	1	76	Tumor	GSE42568	Negative	unknown	unknown	m6Acluster A	unknown	>53	Dead	Gene.cluster B	-7.43352	High m6Ascore
GSM1045303	2713	0	41	Tumor	GSE42568	Positive	unknown	unknown	m6Acluster B	NO	<=53	Alive	Gene.cluster A	-13.3214	Low m6Ascore
GSM1045304	2790	0	53	Tumor	GSE42568	Positive	unknown	unknown	m6Acluster C	NO	<=53	Alive	Gene.cluster A	-15.6579	Low m6Ascore
GSM1045305	2622	0	56	Tumor	GSE42568	Positive	unknown	unknown	m6Acluster C	NO	>53	Alive	Gene.cluster A	-15.0623	Low m6Ascore
GSM1045306	2909	0	60	Tumor	GSE42568	Negative	unknown	unknown	m6Acluster B	unknown	>53	Alive	Gene.cluster B	-11.696	High m6Ascore
GSM1045307	2952	0	46	Tumor	GSE42568	Positive	unknown	unknown	m6Acluster B	NO	<=53	Alive	Gene.cluster C	-14.3395	Low m6Ascore
GSM1045308	2989	0	48	Tumor	GSE42568	unknown	unknown	unknown	m6Acluster A	unknown	<=53	Alive	Gene.cluster C	-18.5239	Low m6Ascore
GSM1045309	2105	0	48	Tumor	GSE42568	Positive	unknown	unknown	m6Acluster A	NO	<=53	Alive	Gene.cluster A	-14.3416	Low m6Ascore
GSM1045310	927	1	70	Tumor	GSE42568	Positive	unknown	unknown	m6Acluster A	NO	>53	Dead	Gene.cluster A	-18.1165	Low m6Ascore
GSM1045311	2962	0	63	Tumor	GSE42568	Positive	unknown	unknown	m6Acluster B	NO	>53	Alive	Gene.cluster C	-15.0205	Low m6Ascore
GSM519117	2555	0	33	Tumor	GSE20685	unknown	unknown	unknown	m6Acluster B	unknown	<=53	Alive	Gene.cluster A	-12.7109	High m6Ascore
GSM519118	2555	0	40	Tumor	GSE20685	unknown	unknown	unknown	m6Acluster C	unknown	<=53	Alive	Gene.cluster C	-13.1258	High m6Ascore
GSM519119	2555	0	35	Tumor	GSE20685	unknown	unknown	unknown	m6Acluster C	unknown	<=53	Alive	Gene.cluster C	-17.3217	Low m6Ascore
GSM519120	2190	0	47	Tumor	GSE20685	unknown	unknown	unknown	m6Acluster A	unknown	<=53	Alive	Gene.cluster A	-11.645	High m6Ascore
GSM519121	2555	0	41	Tumor	GSE20685	unknown	unknown	unknown	m6Acluster C	unknown	<=53	Alive	Gene.cluster B	-9.34938	High m6Ascore
GSM519122	2555	0	44	Tumor	GSE20685	unknown	unknown	unknown	m6Acluster A	unknown	<=53	Alive	Gene.cluster B	-7.93002	High m6Ascore
GSM519123	2190	0	62	Tumor	GSE20685	unknown	unknown	unknown	m6Acluster A	unknown	>53	Alive	Gene.cluster C	-13.8163	Low m6Ascore
GSM519124	2555	0	43	Tumor	GSE20685	unknown	unknown	unknown	m6Acluster B	unknown	<=53	Alive	Gene.cluster B	-9.19194	High m6Ascore
GSM519125	2190	0	40	Tumor	GSE20685	unknown	unknown	unknown	m6Acluster B	unknown	<=53	Alive	Gene.cluster B	-12.5013	High m6Ascore
GSM519126	1825	1	48	Tumor	GSE20685	unknown	unknown	unknown	m6Acluster B	unknown	<=53	Dead	Gene.cluster B	-8.32988	High m6Ascore
GSM519127	2555	0	33	Tumor	GSE20685	unknown	unknown	unknown	m6Acluster C	unknown	<=53	Alive	Gene.cluster A	-12.401	High m6Ascore
GSM519128	2190	0	51	Tumor	GSE20685	unknown	unknown	unknown	m6Acluster C	unknown	<=53	Alive	Gene.cluster C	-12.8512	High m6Ascore
GSM519129	2555	0	57	Tumor	GSE20685	unknown	unknown	unknown	m6Acluster A	unknown	>53	Alive	Gene.cluster B	-7.74888	High m6Ascore
GSM519130	2190	0	43	Tumor	GSE20685	unknown	unknown	unknown	m6Acluster B	unknown	<=53	Alive	Gene.cluster B	-7.13183	High m6Ascore
GSM519131	2555	0	38	Tumor	GSE20685	unknown	unknown	unknown	m6Acluster C	unknown	<=53	Alive	Gene.cluster C	-14.6914	Low m6Ascore
GSM519132	2920	0	48	Tumor	GSE20685	unknown	unknown	unknown	m6Acluster C	unknown	<=53	Alive	Gene.cluster C	-17.6509	Low m6Ascore
GSM519133	365	1	41	Tumor	GSE20685	unknown	unknown	unknown	m6Acluster A	unknown	<=53	Dead	Gene.cluster C	-10.724	High m6Ascore
GSM519134	2190	0	39	Tumor	GSE20685	unknown	unknown	unknown	m6Acluster B	unknown	<=53	Alive	Gene.cluster A	-13.882	Low m6Ascore
GSM519135	1095	1	63	Tumor	GSE20685	unknown	unknown	unknown	m6Acluster C	unknown	>53	Dead	Gene.cluster C	-9.66063	High m6Ascore
GSM519136	2555	0	43	Tumor	GSE20685	unknown	unknown	unknown	m6Acluster B	unknown	<=53	Alive	Gene.cluster A	-13.6957	Low m6Ascore
GSM519137	2555	0	55	Tumor	GSE20685	unknown	unknown	unknown	m6Acluster B	unknown	>53	Alive	Gene.cluster B	-6.95775	High m6Ascore
GSM519138	1825	1	25	Tumor	GSE20685	unknown	unknown	unknown	m6Acluster C	unknown	<=53	Dead	Gene.cluster A	-14.7126	Low m6Ascore
GSM519139	2555	0	45	Tumor	GSE20685	unknown	unknown	unknown	m6Acluster C	unknown	<=53	Alive	Gene.cluster A	-14.3735	Low m6Ascore
GSM519140	2190	0	45	Tumor	GSE20685	unknown	unknown	unknown	m6Acluster B	unknown	<=53	Alive	Gene.cluster A	-12.6002	High m6Ascore
GSM519141	365	1	62	Tumor	GSE20685	unknown	unknown	unknown	m6Acluster B	unknown	>53	Dead	Gene.cluster B	-9.94247	High m6Ascore
GSM519142	2190	0	43	Tumor	GSE20685	unknown	unknown	unknown	m6Acluster B	unknown	<=53	Alive	Gene.cluster B	-6.52521	High m6Ascore
GSM519143	1825	0	66	Tumor	GSE20685	unknown	unknown	unknown	m6Acluster A	unknown	>53	Alive	Gene.cluster A	-14.3106	Low m6Ascore
GSM519144	365	1	42	Tumor	GSE20685	unknown	unknown	unknown	m6Acluster B	unknown	<=53	Dead	Gene.cluster B	-9.18492	High m6Ascore
GSM519145	1825	1	44	Tumor	GSE20685	unknown	unknown	unknown	m6Acluster B	unknown	<=53	Dead	Gene.cluster A	-9.17684	High m6Ascore
GSM519146	2190	0	39	Tumor	GSE20685	unknown	unknown	unknown	m6Acluster B	unknown	<=53	Alive	Gene.cluster C	-16.0919	Low m6Ascore
GSM519147	2190	0	52	Tumor	GSE20685	unknown	unknown	unknown	m6Acluster C	unknown	<=53	Alive	Gene.cluster C	-13.01	High m6Ascore
GSM519148	2190	0	63	Tumor	GSE20685	unknown	unknown	unknown	m6Acluster A	unknown	>53	Alive	Gene.cluster C	-17.3824	Low m6Ascore
GSM519149	1460	1	35	Tumor	GSE20685	unknown	unknown	unknown	m6Acluster B	unknown	<=53	Dead	Gene.cluster B	-12.0931	High m6Ascore
GSM519150	2190	0	43	Tumor	GSE20685	unknown	unknown	unknown	m6Acluster C	unknown	<=53	Alive	Gene.cluster C	-20.102	Low m6Ascore
GSM519151	2190	0	47	Tumor	GSE20685	unknown	unknown	unknown	m6Acluster B	unknown	<=53	Alive	Gene.cluster B	-8.37202	High m6Ascore
GSM519152	2190	0	31	Tumor	GSE20685	unknown	unknown	unknown	m6Acluster B	unknown	<=53	Alive	Gene.cluster B	-6.32563	High m6Ascore
GSM519153	1095	1	29	Tumor	GSE20685	unknown	unknown	unknown	m6Acluster B	unknown	<=53	Dead	Gene.cluster A	-13.337	Low m6Ascore
GSM519154	0	1	58	Tumor	GSE20685	unknown	unknown	unknown	m6Acluster C	unknown	>53	Dead	Gene.cluster B	-8.47215	High m6Ascore
GSM519155	2190	0	46	Tumor	GSE20685	unknown	unknown	unknown	m6Acluster B	unknown	<=53	Alive	Gene.cluster A	-15.3988	Low m6Ascore
GSM519156	1825	0	67	Tumor	GSE20685	unknown	unknown	unknown	m6Acluster C	unknown	>53	Alive	Gene.cluster C	-23.1953	Low m6Ascore
GSM519157	2190	0	43	Tumor	GSE20685	unknown	unknown	unknown	m6Acluster C	unknown	<=53	Alive	Gene.cluster A	-14.966	Low m6Ascore
GSM519158	2190	0	46	Tumor	GSE20685	unknown	unknown	unknown	m6Acluster A	unknown	<=53	Alive	Gene.cluster A	-12.2782	High m6Ascore
GSM519159	2190	0	33	Tumor	GSE20685	unknown	unknown	unknown	m6Acluster A	unknown	<=53	Alive	Gene.cluster A	-15.7007	Low m6Ascore
GSM519160	1825	0	38	Tumor	GSE20685	unknown	unknown	unknown	m6Acluster B	unknown	<=53	Alive	Gene.cluster C	-16.0844	Low m6Ascore
GSM519161	2190	0	48	Tumor	GSE20685	unknown	unknown	unknown	m6Acluster B	unknown	<=53	Alive	Gene.cluster C	-13.915	Low m6Ascore
GSM519162	1825	0	49	Tumor	GSE20685	unknown	unknown	unknown	m6Acluster C	unknown	<=53	Alive	Gene.cluster A	-14.5385	Low m6Ascore
GSM519163	1825	0	52	Tumor	GSE20685	unknown	unknown	unknown	m6Acluster B	unknown	<=53	Alive	Gene.cluster C	-16.5405	Low m6Ascore
GSM519164	1825	0	66	Tumor	GSE20685	unknown	unknown	unknown	m6Acluster C	unknown	>53	Alive	Gene.cluster C	-14.4635	Low m6Ascore
GSM519165	2190	0	49	Tumor	GSE20685	unknown	unknown	unknown	m6Acluster B	unknown	<=53	Alive	Gene.cluster B	-7.99987	High m6Ascore
GSM519166	730	1	53	Tumor	GSE20685	unknown	unknown	unknown	m6Acluster A	unknown	<=53	Dead	Gene.cluster A	-12.1413	High m6Ascore
GSM519167	2555	0	41	Tumor	GSE20685	unknown	unknown	unknown	m6Acluster A	unknown	<=53	Alive	Gene.cluster A	-11.7961	High m6Ascore
GSM519168	2190	0	40	Tumor	GSE20685	unknown	unknown	unknown	m6Acluster C	unknown	<=53	Alive	Gene.cluster C	-15.0476	Low m6Ascore
GSM519169	2190	0	67	Tumor	GSE20685	unknown	unknown	unknown	m6Acluster A	unknown	>53	Alive	Gene.cluster A	-14.5652	Low m6Ascore
GSM519170	2190	0	60	Tumor	GSE20685	unknown	unknown	unknown	m6Acluster B	unknown	>53	Alive	Gene.cluster B	-10.945	High m6Ascore
GSM519171	2190	0	48	Tumor	GSE20685	unknown	unknown	unknown	m6Acluster C	unknown	<=53	Alive	Gene.cluster A	-12.9384	High m6Ascore
GSM519172	365	1	55	Tumor	GSE20685	unknown	unknown	unknown	m6Acluster B	unknown	>53	Dead	Gene.cluster B	-10.8883	High m6Ascore
GSM519173	2190	0	68	Tumor	GSE20685	unknown	unknown	unknown	m6Acluster C	unknown	>53	Alive	Gene.cluster C	-16.4478	Low m6Ascore
GSM519174	2190	0	68	Tumor	GSE20685	unknown	unknown	unknown	m6Acluster A	unknown	>53	Alive	Gene.cluster C	-16.3293	Low m6Ascore
GSM519175	1825	0	61	Tumor	GSE20685	unknown	unknown	unknown	m6Acluster A	unknown	>53	Alive	Gene.cluster C	-14.7084	Low m6Ascore
GSM519176	1825	0	61	Tumor	GSE20685	unknown	unknown	unknown	m6Acluster C	unknown	>53	Alive	Gene.cluster C	-17.668	Low m6Ascore
GSM519177	2190	0	24	Tumor	GSE20685	unknown	unknown	unknown	m6Acluster B	unknown	<=53	Alive	Gene.cluster B	-9.61855	High m6Ascore
GSM519178	1825	0	45	Tumor	GSE20685	unknown	unknown	unknown	m6Acluster C	unknown	<=53	Alive	Gene.cluster C	-23.4425	Low m6Ascore
GSM519179	1460	0	49	Tumor	GSE20685	unknown	unknown	unknown	m6Acluster A	unknown	<=53	Alive	Gene.cluster A	-12.6139	High m6Ascore
GSM519180	1825	0	34	Tumor	GSE20685	unknown	unknown	unknown	m6Acluster C	unknown	<=53	Alive	Gene.cluster C	-13.2098	High m6Ascore
GSM519181	2190	0	61	Tumor	GSE20685	unknown	unknown	unknown	m6Acluster B	unknown	>53	Alive	Gene.cluster B	-6.52325	High m6Ascore
GSM519182	3285	0	45	Tumor	GSE20685	unknown	unknown	unknown	m6Acluster B	unknown	<=53	Alive	Gene.cluster A	-11.7988	High m6Ascore
GSM519183	2190	0	54	Tumor	GSE20685	unknown	unknown	unknown	m6Acluster C	unknown	>53	Alive	Gene.cluster C	-23.1956	Low m6Ascore
GSM519184	1825	0	62	Tumor	GSE20685	unknown	unknown	unknown	m6Acluster C	unknown	>53	Alive	Gene.cluster B	-9.89645	High m6Ascore
GSM519185	2190	0	47	Tumor	GSE20685	unknown	unknown	unknown	m6Acluster C	unknown	<=53	Alive	Gene.cluster C	-16.5191	Low m6Ascore
GSM519186	2190	0	43	Tumor	GSE20685	unknown	unknown	unknown	m6Acluster C	unknown	<=53	Alive	Gene.cluster C	-12.4397	High m6Ascore
GSM519187	2190	0	70	Tumor	GSE20685	unknown	unknown	unknown	m6Acluster C	unknown	>53	Alive	Gene.cluster A	-14.958	Low m6Ascore
GSM519188	2190	0	42	Tumor	GSE20685	unknown	unknown	unknown	m6Acluster C	unknown	<=53	Alive	Gene.cluster C	-15.1451	Low m6Ascore
GSM519189	2190	0	48	Tumor	GSE20685	unknown	unknown	unknown	m6Acluster A	unknown	<=53	Alive	Gene.cluster A	-16.332	Low m6Ascore
GSM519190	0	1	60	Tumor	GSE20685	unknown	unknown	unknown	m6Acluster A	unknown	>53	Dead	Gene.cluster B	-9.41053	High m6Ascore
GSM519191	2190	0	59	Tumor	GSE20685	unknown	unknown	unknown	m6Acluster B	unknown	>53	Alive	Gene.cluster B	-10.5996	High m6Ascore
GSM519192	2190	0	50	Tumor	GSE20685	unknown	unknown	unknown	m6Acluster A	unknown	<=53	Alive	Gene.cluster C	-16.6342	Low m6Ascore
GSM519193	1460	1	46	Tumor	GSE20685	unknown	unknown	unknown	m6Acluster B	unknown	<=53	Dead	Gene.cluster B	-9.64569	High m6Ascore
GSM519194	3650	0	38	Tumor	GSE20685	unknown	unknown	unknown	m6Acluster B	unknown	<=53	Alive	Gene.cluster B	-7.27004	High m6Ascore
GSM519195	5110	1	58	Tumor	GSE20685	unknown	unknown	unknown	m6Acluster C	unknown	>53	Dead	Gene.cluster C	-16.0466	Low m6Ascore
GSM519196	730	1	42	Tumor	GSE20685	unknown	unknown	unknown	m6Acluster A	unknown	<=53	Dead	Gene.cluster B	-11.1864	High m6Ascore
GSM519197	4745	0	51	Tumor	GSE20685	unknown	unknown	unknown	m6Acluster A	unknown	<=53	Alive	Gene.cluster A	-14.5833	Low m6Ascore
GSM519198	4745	0	53	Tumor	GSE20685	unknown	unknown	unknown	m6Acluster A	unknown	<=53	Alive	Gene.cluster A	-12.6197	High m6Ascore
GSM519199	5110	0	40	Tumor	GSE20685	unknown	unknown	unknown	m6Acluster C	unknown	<=53	Alive	Gene.cluster A	-15.4101	Low m6Ascore
GSM519200	1460	1	52	Tumor	GSE20685	unknown	unknown	unknown	m6Acluster A	unknown	<=53	Dead	Gene.cluster B	-7.42676	High m6Ascore
GSM519201	4745	0	57	Tumor	GSE20685	unknown	unknown	unknown	m6Acluster B	unknown	>53	Alive	Gene.cluster B	-9.81837	High m6Ascore
GSM519202	1460	1	40	Tumor	GSE20685	unknown	unknown	unknown	m6Acluster B	unknown	<=53	Dead	Gene.cluster A	-16.9603	Low m6Ascore
GSM519203	3285	1	39	Tumor	GSE20685	unknown	unknown	unknown	m6Acluster A	unknown	<=53	Dead	Gene.cluster A	-14.005	Low m6Ascore
GSM519204	730	1	44	Tumor	GSE20685	unknown	unknown	unknown	m6Acluster A	unknown	<=53	Dead	Gene.cluster B	-10.0077	High m6Ascore
GSM519205	4015	0	39	Tumor	GSE20685	unknown	unknown	unknown	m6Acluster A	unknown	<=53	Alive	Gene.cluster C	-18.1319	Low m6Ascore
GSM519206	4015	0	27	Tumor	GSE20685	unknown	unknown	unknown	m6Acluster C	unknown	<=53	Alive	Gene.cluster C	-18.0699	Low m6Ascore
GSM519207	4745	0	54	Tumor	GSE20685	unknown	unknown	unknown	m6Acluster B	unknown	>53	Alive	Gene.cluster A	-12.2643	High m6Ascore
GSM519208	4745	0	34	Tumor	GSE20685	unknown	unknown	unknown	m6Acluster C	unknown	<=53	Alive	Gene.cluster C	-13.6136	Low m6Ascore
GSM519209	4380	0	48	Tumor	GSE20685	unknown	unknown	unknown	m6Acluster A	unknown	<=53	Alive	Gene.cluster C	-12.8416	High m6Ascore
GSM519210	0	1	53	Tumor	GSE20685	unknown	unknown	unknown	m6Acluster C	unknown	<=53	Dead	Gene.cluster B	-9.43946	High m6Ascore
GSM519211	4015	0	41	Tumor	GSE20685	unknown	unknown	unknown	m6Acluster B	unknown	<=53	Alive	Gene.cluster A	-16.9068	Low m6Ascore
GSM519212	2190	1	40	Tumor	GSE20685	unknown	unknown	unknown	m6Acluster B	unknown	<=53	Dead	Gene.cluster C	-13.9762	Low m6Ascore
GSM519213	1460	1	38	Tumor	GSE20685	unknown	unknown	unknown	m6Acluster A	unknown	<=53	Dead	Gene.cluster A	-9.77146	High m6Ascore
GSM519214	2920	1	71	Tumor	GSE20685	unknown	unknown	unknown	m6Acluster A	unknown	>53	Dead	Gene.cluster C	-15.5513	Low m6Ascore
GSM519215	4745	0	37	Tumor	GSE20685	unknown	unknown	unknown	m6Acluster C	unknown	<=53	Alive	Gene.cluster C	-12.5329	High m6Ascore
GSM519216	4380	0	43	Tumor	GSE20685	unknown	unknown	unknown	m6Acluster B	unknown	<=53	Alive	Gene.cluster A	-14.0532	Low m6Ascore
GSM519217	365	1	51	Tumor	GSE20685	unknown	unknown	unknown	m6Acluster B	unknown	<=53	Dead	Gene.cluster B	-6.96258	High m6Ascore
GSM519218	4380	0	39	Tumor	GSE20685	unknown	unknown	unknown	m6Acluster B	unknown	<=53	Alive	Gene.cluster B	-4.08954	High m6Ascore
GSM519219	2920	0	77	Tumor	GSE20685	unknown	unknown	unknown	m6Acluster B	unknown	>53	Alive	Gene.cluster C	-16.7185	Low m6Ascore
GSM519220	4015	0	43	Tumor	GSE20685	unknown	unknown	unknown	m6Acluster C	unknown	<=53	Alive	Gene.cluster C	-15.5821	Low m6Ascore
GSM519221	4380	0	38	Tumor	GSE20685	unknown	unknown	unknown	m6Acluster C	unknown	<=53	Alive	Gene.cluster C	-15.5321	Low m6Ascore
GSM519222	1825	1	36	Tumor	GSE20685	unknown	unknown	unknown	m6Acluster A	unknown	<=53	Dead	Gene.cluster A	-12.7756	High m6Ascore
GSM519223	365	1	62	Tumor	GSE20685	unknown	unknown	unknown	m6Acluster B	unknown	>53	Dead	Gene.cluster A	-11.1096	High m6Ascore
GSM519224	2190	1	43	Tumor	GSE20685	unknown	unknown	unknown	m6Acluster C	unknown	<=53	Dead	Gene.cluster C	-14.9548	Low m6Ascore
GSM519225	1825	1	61	Tumor	GSE20685	unknown	unknown	unknown	m6Acluster B	unknown	>53	Dead	Gene.cluster A	-11.2955	High m6Ascore
GSM519226	3285	0	63	Tumor	GSE20685	unknown	unknown	unknown	m6Acluster A	unknown	>53	Alive	Gene.cluster C	-11.7682	High m6Ascore
GSM519227	4015	0	52	Tumor	GSE20685	unknown	unknown	unknown	m6Acluster A	unknown	<=53	Alive	Gene.cluster C	-16.0296	Low m6Ascore
GSM519228	4380	0	47	Tumor	GSE20685	unknown	unknown	unknown	m6Acluster C	unknown	<=53	Alive	Gene.cluster A	-19.3631	Low m6Ascore
GSM519229	3285	1	50	Tumor	GSE20685	unknown	unknown	unknown	m6Acluster A	unknown	<=53	Dead	Gene.cluster C	-14.4819	Low m6Ascore
GSM519230	4380	0	48	Tumor	GSE20685	unknown	unknown	unknown	m6Acluster A	unknown	<=53	Alive	Gene.cluster A	-13.2289	High m6Ascore
GSM519231	4380	0	32	Tumor	GSE20685	unknown	unknown	unknown	m6Acluster C	unknown	<=53	Alive	Gene.cluster B	-10.8835	High m6Ascore
GSM519232	4380	0	43	Tumor	GSE20685	unknown	unknown	unknown	m6Acluster B	unknown	<=53	Alive	Gene.cluster A	-10.7595	High m6Ascore
GSM519233	4380	0	51	Tumor	GSE20685	unknown	unknown	unknown	m6Acluster A	unknown	<=53	Alive	Gene.cluster C	-16.115	Low m6Ascore
GSM519234	3650	0	59	Tumor	GSE20685	unknown	unknown	unknown	m6Acluster C	unknown	>53	Alive	Gene.cluster A	-8.80011	High m6Ascore
GSM519235	730	1	40	Tumor	GSE20685	unknown	unknown	unknown	m6Acluster B	unknown	<=53	Dead	Gene.cluster B	-9.43791	High m6Ascore
GSM519236	730	1	43	Tumor	GSE20685	unknown	unknown	unknown	m6Acluster C	unknown	<=53	Dead	Gene.cluster C	-13.6813	Low m6Ascore
GSM519237	365	1	39	Tumor	GSE20685	unknown	unknown	unknown	m6Acluster A	unknown	<=53	Dead	Gene.cluster B	-3.81491	High m6Ascore
GSM519238	4015	1	43	Tumor	GSE20685	unknown	unknown	unknown	m6Acluster B	unknown	<=53	Dead	Gene.cluster A	-9.60024	High m6Ascore
GSM519239	1460	1	38	Tumor	GSE20685	unknown	unknown	unknown	m6Acluster A	unknown	<=53	Dead	Gene.cluster B	-10.4033	High m6Ascore
GSM519240	4380	0	54	Tumor	GSE20685	unknown	unknown	unknown	m6Acluster B	unknown	>53	Alive	Gene.cluster C	-16.1188	Low m6Ascore
GSM519241	4015	0	42	Tumor	GSE20685	unknown	unknown	unknown	m6Acluster A	unknown	<=53	Alive	Gene.cluster B	-10.6075	High m6Ascore
GSM519242	4015	0	45	Tumor	GSE20685	unknown	unknown	unknown	m6Acluster A	unknown	<=53	Alive	Gene.cluster C	-15.134	Low m6Ascore
GSM519243	3650	0	38	Tumor	GSE20685	unknown	unknown	unknown	m6Acluster B	unknown	<=53	Alive	Gene.cluster B	-8.29667	High m6Ascore
GSM519244	4015	0	53	Tumor	GSE20685	unknown	unknown	unknown	m6Acluster C	unknown	<=53	Alive	Gene.cluster B	-12.9565	High m6Ascore
GSM519245	2555	1	46	Tumor	GSE20685	unknown	unknown	unknown	m6Acluster B	unknown	<=53	Dead	Gene.cluster A	-10.3075	High m6Ascore
GSM519246	2920	1	50	Tumor	GSE20685	unknown	unknown	unknown	m6Acluster C	unknown	<=53	Dead	Gene.cluster C	-15.2131	Low m6Ascore
GSM519247	4380	0	37	Tumor	GSE20685	unknown	unknown	unknown	m6Acluster A	unknown	<=53	Alive	Gene.cluster A	-12.0967	High m6Ascore
GSM519248	1825	1	39	Tumor	GSE20685	unknown	unknown	unknown	m6Acluster C	unknown	<=53	Dead	Gene.cluster C	-17.3797	Low m6Ascore
GSM519249	4015	0	58	Tumor	GSE20685	unknown	unknown	unknown	m6Acluster B	unknown	>53	Alive	Gene.cluster B	-9.09377	High m6Ascore
GSM519250	4015	0	61	Tumor	GSE20685	unknown	unknown	unknown	m6Acluster C	unknown	>53	Alive	Gene.cluster C	-20.1434	Low m6Ascore
GSM519251	4015	0	30	Tumor	GSE20685	unknown	unknown	unknown	m6Acluster B	unknown	<=53	Alive	Gene.cluster B	-7.8184	High m6Ascore
GSM519252	4015	0	62	Tumor	GSE20685	unknown	unknown	unknown	m6Acluster C	unknown	>53	Alive	Gene.cluster C	-14.8269	Low m6Ascore
GSM519253	730	1	62	Tumor	GSE20685	unknown	unknown	unknown	m6Acluster B	unknown	>53	Dead	Gene.cluster A	-16.5777	Low m6Ascore
GSM519254	4015	0	43	Tumor	GSE20685	unknown	unknown	unknown	m6Acluster C	unknown	<=53	Alive	Gene.cluster C	-15.9287	Low m6Ascore
GSM519255	4380	0	41	Tumor	GSE20685	unknown	unknown	unknown	m6Acluster A	unknown	<=53	Alive	Gene.cluster C	-14.2073	Low m6Ascore
GSM519256	4380	0	43	Tumor	GSE20685	unknown	unknown	unknown	m6Acluster C	unknown	<=53	Alive	Gene.cluster C	-20.2542	Low m6Ascore
GSM519257	1460	1	27	Tumor	GSE20685	unknown	unknown	unknown	m6Acluster B	unknown	<=53	Dead	Gene.cluster A	-12.67	High m6Ascore
GSM519258	3650	0	58	Tumor	GSE20685	unknown	unknown	unknown	m6Acluster A	unknown	>53	Alive	Gene.cluster C	-14.1008	Low m6Ascore
GSM519259	4015	1	43	Tumor	GSE20685	unknown	unknown	unknown	m6Acluster C	unknown	<=53	Dead	Gene.cluster C	-13.3666	Low m6Ascore
GSM519260	4380	0	42	Tumor	GSE20685	unknown	unknown	unknown	m6Acluster A	unknown	<=53	Alive	Gene.cluster C	-15.6743	Low m6Ascore
GSM519261	4380	0	41	Tumor	GSE20685	unknown	unknown	unknown	m6Acluster C	unknown	<=53	Alive	Gene.cluster C	-15.4552	Low m6Ascore
GSM519262	3285	0	60	Tumor	GSE20685	unknown	unknown	unknown	m6Acluster C	unknown	>53	Alive	Gene.cluster B	-10.2953	High m6Ascore
GSM519263	730	1	46	Tumor	GSE20685	unknown	unknown	unknown	m6Acluster C	unknown	<=53	Dead	Gene.cluster C	-12.128	High m6Ascore
GSM519264	4015	0	57	Tumor	GSE20685	unknown	unknown	unknown	m6Acluster B	unknown	>53	Alive	Gene.cluster B	-10.6907	High m6Ascore
GSM519265	1825	1	51	Tumor	GSE20685	unknown	unknown	unknown	m6Acluster C	unknown	<=53	Dead	Gene.cluster B	-5.64501	High m6Ascore
GSM519266	365	1	58	Tumor	GSE20685	unknown	unknown	unknown	m6Acluster B	unknown	>53	Dead	Gene.cluster B	-7.64446	High m6Ascore
GSM519267	4745	0	48	Tumor	GSE20685	unknown	unknown	unknown	m6Acluster A	unknown	<=53	Alive	Gene.cluster B	-7.91139	High m6Ascore
GSM519268	4015	0	36	Tumor	GSE20685	unknown	unknown	unknown	m6Acluster C	unknown	<=53	Alive	Gene.cluster C	-12.6337	High m6Ascore
GSM519269	1825	1	42	Tumor	GSE20685	unknown	unknown	unknown	m6Acluster B	unknown	<=53	Dead	Gene.cluster C	-13.4097	Low m6Ascore
GSM519270	4380	0	46	Tumor	GSE20685	unknown	unknown	unknown	m6Acluster C	unknown	<=53	Alive	Gene.cluster A	-12.5857	High m6Ascore
GSM519271	3285	0	51	Tumor	GSE20685	unknown	unknown	unknown	m6Acluster C	unknown	<=53	Alive	Gene.cluster A	-16.5681	Low m6Ascore
GSM519272	4015	0	71	Tumor	GSE20685	unknown	unknown	unknown	m6Acluster C	unknown	>53	Alive	Gene.cluster B	-11.6898	High m6Ascore
GSM519273	4380	0	51	Tumor	GSE20685	unknown	unknown	unknown	m6Acluster C	unknown	<=53	Alive	Gene.cluster A	-13.0617	High m6Ascore
GSM519274	3650	0	31	Tumor	GSE20685	unknown	unknown	unknown	m6Acluster B	unknown	<=53	Alive	Gene.cluster B	-5.85662	High m6Ascore
GSM519275	3650	0	34	Tumor	GSE20685	unknown	unknown	unknown	m6Acluster C	unknown	<=53	Alive	Gene.cluster A	-15.9606	Low m6Ascore
GSM519276	4380	0	51	Tumor	GSE20685	unknown	unknown	unknown	m6Acluster C	unknown	<=53	Alive	Gene.cluster A	-11.3049	High m6Ascore
GSM519277	2555	0	33	Tumor	GSE20685	unknown	unknown	unknown	m6Acluster B	unknown	<=53	Alive	Gene.cluster B	-7.60326	High m6Ascore
GSM519278	4015	0	43	Tumor	GSE20685	unknown	unknown	unknown	m6Acluster C	unknown	<=53	Alive	Gene.cluster C	-15.1485	Low m6Ascore
GSM519279	2555	1	48	Tumor	GSE20685	unknown	unknown	unknown	m6Acluster A	unknown	<=53	Dead	Gene.cluster C	-11.9562	High m6Ascore
GSM519280	730	1	56	Tumor	GSE20685	unknown	unknown	unknown	m6Acluster C	unknown	>53	Dead	Gene.cluster C	-13.9339	Low m6Ascore
GSM519281	2555	0	41	Tumor	GSE20685	unknown	unknown	unknown	m6Acluster B	unknown	<=53	Alive	Gene.cluster B	-8.69785	High m6Ascore
GSM519282	3650	0	58	Tumor	GSE20685	unknown	unknown	unknown	m6Acluster A	unknown	>53	Alive	Gene.cluster B	-9.95988	High m6Ascore
GSM519283	3650	0	53	Tumor	GSE20685	unknown	unknown	unknown	m6Acluster B	unknown	<=53	Alive	Gene.cluster C	-16.7008	Low m6Ascore
GSM519284	4015	0	44	Tumor	GSE20685	unknown	unknown	unknown	m6Acluster C	unknown	<=53	Alive	Gene.cluster C	-15.4909	Low m6Ascore
GSM519285	4015	1	57	Tumor	GSE20685	unknown	unknown	unknown	m6Acluster B	unknown	>53	Dead	Gene.cluster A	-11.8211	High m6Ascore
GSM519286	3650	0	45	Tumor	GSE20685	unknown	unknown	unknown	m6Acluster B	unknown	<=53	Alive	Gene.cluster A	-14.0833	Low m6Ascore
GSM519287	4015	0	41	Tumor	GSE20685	unknown	unknown	unknown	m6Acluster C	unknown	<=53	Alive	Gene.cluster A	-16.4149	Low m6Ascore
GSM519288	4015	0	54	Tumor	GSE20685	unknown	unknown	unknown	m6Acluster C	unknown	>53	Alive	Gene.cluster A	-14.5628	Low m6Ascore
GSM519289	365	1	64	Tumor	GSE20685	unknown	unknown	unknown	m6Acluster A	unknown	>53	Dead	Gene.cluster B	-10.4444	High m6Ascore
GSM519290	3650	0	56	Tumor	GSE20685	unknown	unknown	unknown	m6Acluster C	unknown	>53	Alive	Gene.cluster C	-15.5634	Low m6Ascore
GSM519291	4015	0	58	Tumor	GSE20685	unknown	unknown	unknown	m6Acluster C	unknown	>53	Alive	Gene.cluster C	-15.7361	Low m6Ascore
GSM519292	4380	0	38	Tumor	GSE20685	unknown	unknown	unknown	m6Acluster B	unknown	<=53	Alive	Gene.cluster A	-10.1751	High m6Ascore
GSM519293	365	1	42	Tumor	GSE20685	unknown	unknown	unknown	m6Acluster A	unknown	<=53	Dead	Gene.cluster B	-10.5555	High m6Ascore
GSM519294	3650	0	69	Tumor	GSE20685	unknown	unknown	unknown	m6Acluster A	unknown	>53	Alive	Gene.cluster B	-11.5849	High m6Ascore
GSM519295	3650	0	79	Tumor	GSE20685	unknown	unknown	unknown	m6Acluster A	unknown	>53	Alive	Gene.cluster A	-8.72565	High m6Ascore
GSM519296	4015	0	37	Tumor	GSE20685	unknown	unknown	unknown	m6Acluster B	unknown	<=53	Alive	Gene.cluster A	-9.66334	High m6Ascore
GSM519297	3285	0	44	Tumor	GSE20685	unknown	unknown	unknown	m6Acluster B	unknown	<=53	Alive	Gene.cluster A	-14.311	Low m6Ascore
GSM519298	365	1	48	Tumor	GSE20685	unknown	unknown	unknown	m6Acluster B	unknown	<=53	Dead	Gene.cluster B	-10.264	High m6Ascore
GSM519299	3285	0	43	Tumor	GSE20685	unknown	unknown	unknown	m6Acluster B	unknown	<=53	Alive	Gene.cluster B	-6.08403	High m6Ascore
GSM519300	4015	0	50	Tumor	GSE20685	unknown	unknown	unknown	m6Acluster A	unknown	<=53	Alive	Gene.cluster B	-10.406	High m6Ascore
GSM519301	3650	0	30	Tumor	GSE20685	unknown	unknown	unknown	m6Acluster B	unknown	<=53	Alive	Gene.cluster B	-6.32329	High m6Ascore
GSM519302	4015	0	36	Tumor	GSE20685	unknown	unknown	unknown	m6Acluster A	unknown	<=53	Alive	Gene.cluster B	-8.6513	High m6Ascore
GSM519303	2555	1	57	Tumor	GSE20685	unknown	unknown	unknown	m6Acluster A	unknown	>53	Dead	Gene.cluster B	-6.87462	High m6Ascore
GSM519304	730	1	49	Tumor	GSE20685	unknown	unknown	unknown	m6Acluster B	unknown	<=53	Dead	Gene.cluster B	-5.01275	High m6Ascore
GSM519305	365	1	41	Tumor	GSE20685	unknown	unknown	unknown	m6Acluster B	unknown	<=53	Dead	Gene.cluster B	-8.8886	High m6Ascore
GSM519306	1825	1	52	Tumor	GSE20685	unknown	unknown	unknown	m6Acluster A	unknown	<=53	Dead	Gene.cluster C	-20.7222	Low m6Ascore
GSM519307	4015	0	47	Tumor	GSE20685	unknown	unknown	unknown	m6Acluster A	unknown	<=53	Alive	Gene.cluster C	-15.0879	Low m6Ascore
GSM519308	4015	0	63	Tumor	GSE20685	unknown	unknown	unknown	m6Acluster C	unknown	>53	Alive	Gene.cluster C	-20.8183	Low m6Ascore
GSM519309	365	1	31	Tumor	GSE20685	unknown	unknown	unknown	m6Acluster C	unknown	<=53	Dead	Gene.cluster C	-17.7218	Low m6Ascore
GSM519310	1095	1	34	Tumor	GSE20685	unknown	unknown	unknown	m6Acluster C	unknown	<=53	Dead	Gene.cluster A	-12.2998	High m6Ascore
GSM519311	3285	0	30	Tumor	GSE20685	unknown	unknown	unknown	m6Acluster B	unknown	<=53	Alive	Gene.cluster C	-14.867	Low m6Ascore
GSM519312	4015	0	39	Tumor	GSE20685	unknown	unknown	unknown	m6Acluster B	unknown	<=53	Alive	Gene.cluster B	-8.03952	High m6Ascore
GSM519313	4015	0	38	Tumor	GSE20685	unknown	unknown	unknown	m6Acluster B	unknown	<=53	Alive	Gene.cluster A	-13.6463	Low m6Ascore
GSM519314	3285	0	43	Tumor	GSE20685	unknown	unknown	unknown	m6Acluster B	unknown	<=53	Alive	Gene.cluster C	-15.1354	Low m6Ascore
GSM519315	3650	0	43	Tumor	GSE20685	unknown	unknown	unknown	m6Acluster A	unknown	<=53	Alive	Gene.cluster B	-7.94234	High m6Ascore
GSM519316	4015	0	49	Tumor	GSE20685	unknown	unknown	unknown	m6Acluster B	unknown	<=53	Alive	Gene.cluster C	-17.7883	Low m6Ascore
GSM519317	4015	0	67	Tumor	GSE20685	unknown	unknown	unknown	m6Acluster B	unknown	>53	Alive	Gene.cluster A	-9.9549	High m6Ascore
GSM519318	2190	0	75	Tumor	GSE20685	unknown	unknown	unknown	m6Acluster B	unknown	>53	Alive	Gene.cluster A	-11.8397	High m6Ascore
GSM519319	3285	0	41	Tumor	GSE20685	unknown	unknown	unknown	m6Acluster C	unknown	<=53	Alive	Gene.cluster C	-14.512	Low m6Ascore
GSM519320	4015	0	70	Tumor	GSE20685	unknown	unknown	unknown	m6Acluster A	unknown	>53	Alive	Gene.cluster A	-14.5274	Low m6Ascore
GSM519321	4015	0	46	Tumor	GSE20685	unknown	unknown	unknown	m6Acluster B	unknown	<=53	Alive	Gene.cluster B	-10.7202	High m6Ascore
GSM519322	1095	1	46	Tumor	GSE20685	unknown	unknown	unknown	m6Acluster C	unknown	<=53	Dead	Gene.cluster C	-14.1381	Low m6Ascore
GSM519323	3650	1	37	Tumor	GSE20685	unknown	unknown	unknown	m6Acluster A	unknown	<=53	Dead	Gene.cluster C	-16.0361	Low m6Ascore
GSM519324	1460	1	38	Tumor	GSE20685	unknown	unknown	unknown	m6Acluster B	unknown	<=53	Dead	Gene.cluster B	-7.97246	High m6Ascore
GSM519325	4015	0	55	Tumor	GSE20685	unknown	unknown	unknown	m6Acluster C	unknown	>53	Alive	Gene.cluster A	-11.858	High m6Ascore
GSM519326	4015	0	32	Tumor	GSE20685	unknown	unknown	unknown	m6Acluster C	unknown	<=53	Alive	Gene.cluster C	-15.3879	Low m6Ascore
GSM519327	2190	1	46	Tumor	GSE20685	unknown	unknown	unknown	m6Acluster B	unknown	<=53	Dead	Gene.cluster A	-11.1837	High m6Ascore
GSM519328	2555	0	72	Tumor	GSE20685	unknown	unknown	unknown	m6Acluster A	unknown	>53	Alive	Gene.cluster A	-12.5793	High m6Ascore
GSM519329	3285	0	33	Tumor	GSE20685	unknown	unknown	unknown	m6Acluster C	unknown	<=53	Alive	Gene.cluster A	-14.5319	Low m6Ascore
GSM519330	3650	0	40	Tumor	GSE20685	unknown	unknown	unknown	m6Acluster C	unknown	<=53	Alive	Gene.cluster C	-13.2744	High m6Ascore
GSM519331	4015	0	45	Tumor	GSE20685	unknown	unknown	unknown	m6Acluster C	unknown	<=53	Alive	Gene.cluster C	-14.3565	Low m6Ascore
GSM519332	4015	0	39	Tumor	GSE20685	unknown	unknown	unknown	m6Acluster C	unknown	<=53	Alive	Gene.cluster A	-15.6185	Low m6Ascore
GSM519333	2555	1	47	Tumor	GSE20685	unknown	unknown	unknown	m6Acluster B	unknown	<=53	Dead	Gene.cluster B	-9.60648	High m6Ascore
GSM519334	3285	0	54	Tumor	GSE20685	unknown	unknown	unknown	m6Acluster B	unknown	>53	Alive	Gene.cluster A	-11.6464	High m6Ascore
GSM519335	4015	0	58	Tumor	GSE20685	unknown	unknown	unknown	m6Acluster C	unknown	>53	Alive	Gene.cluster A	-16.2537	Low m6Ascore
GSM519336	4015	0	31	Tumor	GSE20685	unknown	unknown	unknown	m6Acluster A	unknown	<=53	Alive	Gene.cluster A	-15.0191	Low m6Ascore
GSM519337	730	1	81	Tumor	GSE20685	unknown	unknown	unknown	m6Acluster C	unknown	>53	Dead	Gene.cluster A	-12.4813	High m6Ascore
GSM519338	3650	0	43	Tumor	GSE20685	unknown	unknown	unknown	m6Acluster C	unknown	<=53	Alive	Gene.cluster C	-19.9584	Low m6Ascore
GSM519339	4015	0	66	Tumor	GSE20685	unknown	unknown	unknown	m6Acluster A	unknown	>53	Alive	Gene.cluster A	-11.5597	High m6Ascore
GSM519340	4015	0	48	Tumor	GSE20685	unknown	unknown	unknown	m6Acluster A	unknown	<=53	Alive	Gene.cluster A	-17.6398	Low m6Ascore
GSM519341	3650	0	62	Tumor	GSE20685	unknown	unknown	unknown	m6Acluster C	unknown	>53	Alive	Gene.cluster B	-7.41406	High m6Ascore
GSM519342	1825	1	36	Tumor	GSE20685	unknown	unknown	unknown	m6Acluster B	unknown	<=53	Dead	Gene.cluster A	-13.2643	High m6Ascore
GSM519343	3650	0	55	Tumor	GSE20685	unknown	unknown	unknown	m6Acluster B	unknown	>53	Alive	Gene.cluster C	-11.511	High m6Ascore
GSM519344	3285	0	43	Tumor	GSE20685	unknown	unknown	unknown	m6Acluster B	unknown	<=53	Alive	Gene.cluster A	-12.972	High m6Ascore
GSM519345	3285	0	40	Tumor	GSE20685	unknown	unknown	unknown	m6Acluster B	unknown	<=53	Alive	Gene.cluster A	-13.47	Low m6Ascore
GSM519346	3650	0	54	Tumor	GSE20685	unknown	unknown	unknown	m6Acluster B	unknown	>53	Alive	Gene.cluster B	-5.86079	High m6Ascore
GSM519347	3650	1	60	Tumor	GSE20685	unknown	unknown	unknown	m6Acluster B	unknown	>53	Dead	Gene.cluster A	-13.7262	Low m6Ascore
GSM519348	3650	0	47	Tumor	GSE20685	unknown	unknown	unknown	m6Acluster B	unknown	<=53	Alive	Gene.cluster B	-12.5348	High m6Ascore
GSM519349	365	1	35	Tumor	GSE20685	unknown	unknown	unknown	m6Acluster B	unknown	<=53	Dead	Gene.cluster A	-13.5616	Low m6Ascore
GSM519350	3285	0	52	Tumor	GSE20685	unknown	unknown	unknown	m6Acluster C	unknown	<=53	Alive	Gene.cluster A	-12.8828	High m6Ascore
GSM519351	2555	0	44	Tumor	GSE20685	unknown	unknown	unknown	m6Acluster C	unknown	<=53	Alive	Gene.cluster C	-19.0893	Low m6Ascore
GSM519352	2920	1	46	Tumor	GSE20685	unknown	unknown	unknown	m6Acluster B	unknown	<=53	Dead	Gene.cluster C	-12.4669	High m6Ascore
GSM519353	2555	0	82	Tumor	GSE20685	unknown	unknown	unknown	m6Acluster A	unknown	>53	Alive	Gene.cluster C	-15.0159	Low m6Ascore
GSM519354	3285	0	38	Tumor	GSE20685	unknown	unknown	unknown	m6Acluster A	unknown	<=53	Alive	Gene.cluster C	-19.4508	Low m6Ascore
GSM519355	3650	0	38	Tumor	GSE20685	unknown	unknown	unknown	m6Acluster C	unknown	<=53	Alive	Gene.cluster A	-14.3128	Low m6Ascore
GSM519356	3650	0	45	Tumor	GSE20685	unknown	unknown	unknown	m6Acluster C	unknown	<=53	Alive	Gene.cluster C	-22.9209	Low m6Ascore
GSM519357	1825	1	41	Tumor	GSE20685	unknown	unknown	unknown	m6Acluster B	unknown	<=53	Dead	Gene.cluster C	-10.6665	High m6Ascore
GSM519358	2920	0	47	Tumor	GSE20685	unknown	unknown	unknown	m6Acluster B	unknown	<=53	Alive	Gene.cluster C	-14.1329	Low m6Ascore
GSM519359	365	1	84	Tumor	GSE20685	unknown	unknown	unknown	m6Acluster B	unknown	>53	Dead	Gene.cluster B	-10.7169	High m6Ascore
GSM519360	3285	0	54	Tumor	GSE20685	unknown	unknown	unknown	m6Acluster B	unknown	>53	Alive	Gene.cluster A	-11.5069	High m6Ascore
GSM519361	2920	0	66	Tumor	GSE20685	unknown	unknown	unknown	m6Acluster C	unknown	>53	Alive	Gene.cluster C	-14.6422	Low m6Ascore
GSM519362	3285	0	63	Tumor	GSE20685	unknown	unknown	unknown	m6Acluster B	unknown	>53	Alive	Gene.cluster B	-3.38302	High m6Ascore
GSM519363	2920	0	55	Tumor	GSE20685	unknown	unknown	unknown	m6Acluster C	unknown	>53	Alive	Gene.cluster C	-13.6114	Low m6Ascore
GSM519364	3650	0	47	Tumor	GSE20685	unknown	unknown	unknown	m6Acluster C	unknown	<=53	Alive	Gene.cluster C	-15.086	Low m6Ascore
GSM519365	3285	0	45	Tumor	GSE20685	unknown	unknown	unknown	m6Acluster C	unknown	<=53	Alive	Gene.cluster C	-12.8803	High m6Ascore
GSM519366	3650	0	56	Tumor	GSE20685	unknown	unknown	unknown	m6Acluster B	unknown	>53	Alive	Gene.cluster C	-15.8912	Low m6Ascore
GSM519367	1095	1	38	Tumor	GSE20685	unknown	unknown	unknown	m6Acluster B	unknown	<=53	Dead	Gene.cluster B	-6.1365	High m6Ascore
GSM519368	1095	1	49	Tumor	GSE20685	unknown	unknown	unknown	m6Acluster C	unknown	<=53	Dead	Gene.cluster A	-13.2371	High m6Ascore
GSM519369	3650	0	53	Tumor	GSE20685	unknown	unknown	unknown	m6Acluster B	unknown	<=53	Alive	Gene.cluster A	-13.2907	High m6Ascore
GSM519370	1825	1	34	Tumor	GSE20685	unknown	unknown	unknown	m6Acluster C	unknown	<=53	Dead	Gene.cluster C	-12.8247	High m6Ascore
GSM519371	2555	1	38	Tumor	GSE20685	unknown	unknown	unknown	m6Acluster B	unknown	<=53	Dead	Gene.cluster A	-15.6004	Low m6Ascore
GSM519372	3650	0	41	Tumor	GSE20685	unknown	unknown	unknown	m6Acluster A	unknown	<=53	Alive	Gene.cluster A	-13.9805	Low m6Ascore
GSM519373	2555	0	52	Tumor	GSE20685	unknown	unknown	unknown	m6Acluster A	unknown	<=53	Alive	Gene.cluster A	-10.7186	High m6Ascore
GSM519374	3650	0	40	Tumor	GSE20685	unknown	unknown	unknown	m6Acluster A	unknown	<=53	Alive	Gene.cluster A	-13.3805	Low m6Ascore
GSM519375	2920	0	43	Tumor	GSE20685	unknown	unknown	unknown	m6Acluster A	unknown	<=53	Alive	Gene.cluster B	-11.4053	High m6Ascore
GSM519376	3285	0	62	Tumor	GSE20685	unknown	unknown	unknown	m6Acluster B	unknown	>53	Alive	Gene.cluster A	-13.7787	Low m6Ascore
GSM519377	3650	0	62	Tumor	GSE20685	unknown	unknown	unknown	m6Acluster B	unknown	>53	Alive	Gene.cluster C	-14.8586	Low m6Ascore
GSM519378	3285	0	44	Tumor	GSE20685	unknown	unknown	unknown	m6Acluster B	unknown	<=53	Alive	Gene.cluster A	-13.4643	Low m6Ascore
GSM519379	3285	0	41	Tumor	GSE20685	unknown	unknown	unknown	m6Acluster C	unknown	<=53	Alive	Gene.cluster C	-15.6756	Low m6Ascore
GSM519380	3285	0	38	Tumor	GSE20685	unknown	unknown	unknown	m6Acluster C	unknown	<=53	Alive	Gene.cluster B	-8.03746	High m6Ascore
GSM519381	3285	0	43	Tumor	GSE20685	unknown	unknown	unknown	m6Acluster C	unknown	<=53	Alive	Gene.cluster B	-10.829	High m6Ascore
GSM519382	1095	1	48	Tumor	GSE20685	unknown	unknown	unknown	m6Acluster C	unknown	<=53	Dead	Gene.cluster C	-14.7338	Low m6Ascore
GSM519383	3285	0	39	Tumor	GSE20685	unknown	unknown	unknown	m6Acluster C	unknown	<=53	Alive	Gene.cluster C	-17.0707	Low m6Ascore
GSM519384	2920	0	44	Tumor	GSE20685	unknown	unknown	unknown	m6Acluster B	unknown	<=53	Alive	Gene.cluster B	-12.2559	High m6Ascore
GSM519385	3285	0	37	Tumor	GSE20685	unknown	unknown	unknown	m6Acluster C	unknown	<=53	Alive	Gene.cluster A	-12.4064	High m6Ascore
GSM519386	3650	0	41	Tumor	GSE20685	unknown	unknown	unknown	m6Acluster A	unknown	<=53	Alive	Gene.cluster A	-8.89729	High m6Ascore
GSM519387	2920	0	53	Tumor	GSE20685	unknown	unknown	unknown	m6Acluster B	unknown	<=53	Alive	Gene.cluster B	-11.6503	High m6Ascore
GSM519388	3285	0	36	Tumor	GSE20685	unknown	unknown	unknown	m6Acluster B	unknown	<=53	Alive	Gene.cluster B	-12.81	High m6Ascore
GSM519389	3285	0	55	Tumor	GSE20685	unknown	unknown	unknown	m6Acluster B	unknown	>53	Alive	Gene.cluster B	-8.51206	High m6Ascore
GSM519390	3285	0	52	Tumor	GSE20685	unknown	unknown	unknown	m6Acluster A	unknown	<=53	Alive	Gene.cluster C	-14.8378	Low m6Ascore
GSM519391	3285	0	63	Tumor	GSE20685	unknown	unknown	unknown	m6Acluster B	unknown	>53	Alive	Gene.cluster C	-11.7639	High m6Ascore
GSM519392	2920	0	47	Tumor	GSE20685	unknown	unknown	unknown	m6Acluster C	unknown	<=53	Alive	Gene.cluster C	-13.2901	High m6Ascore
GSM519393	3285	0	49	Tumor	GSE20685	unknown	unknown	unknown	m6Acluster C	unknown	<=53	Alive	Gene.cluster A	-12.7646	High m6Ascore
GSM519394	3285	0	48	Tumor	GSE20685	unknown	unknown	unknown	m6Acluster B	unknown	<=53	Alive	Gene.cluster A	-14.4115	Low m6Ascore
GSM519395	2920	0	47	Tumor	GSE20685	unknown	unknown	unknown	m6Acluster A	unknown	<=53	Alive	Gene.cluster C	-15.1786	Low m6Ascore
GSM519396	2190	1	41	Tumor	GSE20685	unknown	unknown	unknown	m6Acluster A	unknown	<=53	Dead	Gene.cluster A	-12.3545	High m6Ascore
GSM519397	3285	0	53	Tumor	GSE20685	unknown	unknown	unknown	m6Acluster C	unknown	<=53	Alive	Gene.cluster C	-14.9412	Low m6Ascore
GSM519398	2555	1	46	Tumor	GSE20685	unknown	unknown	unknown	m6Acluster A	unknown	<=53	Dead	Gene.cluster A	-10.3664	High m6Ascore
GSM519399	3285	0	57	Tumor	GSE20685	unknown	unknown	unknown	m6Acluster A	unknown	>53	Alive	Gene.cluster A	-12.6422	High m6Ascore
GSM519400	1095	1	43	Tumor	GSE20685	unknown	unknown	unknown	m6Acluster A	unknown	<=53	Dead	Gene.cluster A	-13.9946	Low m6Ascore
GSM519401	3285	0	47	Tumor	GSE20685	unknown	unknown	unknown	m6Acluster B	unknown	<=53	Alive	Gene.cluster A	-13.5925	Low m6Ascore
GSM519402	2920	0	48	Tumor	GSE20685	unknown	unknown	unknown	m6Acluster C	unknown	<=53	Alive	Gene.cluster A	-21.4683	Low m6Ascore
GSM519403	0	1	39	Tumor	GSE20685	unknown	unknown	unknown	m6Acluster B	unknown	<=53	Dead	Gene.cluster A	-16.3765	Low m6Ascore
GSM519404	3285	0	58	Tumor	GSE20685	unknown	unknown	unknown	m6Acluster C	unknown	>53	Alive	Gene.cluster C	-12.2364	High m6Ascore
GSM519405	2920	0	42	Tumor	GSE20685	unknown	unknown	unknown	m6Acluster B	unknown	<=53	Alive	Gene.cluster A	-14.8601	Low m6Ascore
GSM519406	2920	0	57	Tumor	GSE20685	unknown	unknown	unknown	m6Acluster C	unknown	>53	Alive	Gene.cluster C	-17.2893	Low m6Ascore
GSM519407	2920	0	40	Tumor	GSE20685	unknown	unknown	unknown	m6Acluster B	unknown	<=53	Alive	Gene.cluster A	-14.6326	Low m6Ascore
GSM519408	2555	0	48	Tumor	GSE20685	unknown	unknown	unknown	m6Acluster A	unknown	<=53	Alive	Gene.cluster C	-16.1078	Low m6Ascore
GSM519409	2920	0	46	Tumor	GSE20685	unknown	unknown	unknown	m6Acluster C	unknown	<=53	Alive	Gene.cluster C	-12.755	High m6Ascore
GSM519410	2920	0	49	Tumor	GSE20685	unknown	unknown	unknown	m6Acluster C	unknown	<=53	Alive	Gene.cluster A	-10.8931	High m6Ascore
GSM519411	2920	0	53	Tumor	GSE20685	unknown	unknown	unknown	m6Acluster B	unknown	<=53	Alive	Gene.cluster A	-14.8291	Low m6Ascore
GSM519412	3285	0	39	Tumor	GSE20685	unknown	unknown	unknown	m6Acluster B	unknown	<=53	Alive	Gene.cluster C	-11.9032	High m6Ascore
GSM519413	2555	0	50	Tumor	GSE20685	unknown	unknown	unknown	m6Acluster C	unknown	<=53	Alive	Gene.cluster C	-17.1136	Low m6Ascore
GSM519414	2920	0	34	Tumor	GSE20685	unknown	unknown	unknown	m6Acluster C	unknown	<=53	Alive	Gene.cluster C	-11.9967	High m6Ascore
GSM519415	2920	0	53	Tumor	GSE20685	unknown	unknown	unknown	m6Acluster C	unknown	<=53	Alive	Gene.cluster C	-17.4806	Low m6Ascore
GSM519416	2920	0	59	Tumor	GSE20685	unknown	unknown	unknown	m6Acluster C	unknown	>53	Alive	Gene.cluster C	-12.2179	High m6Ascore
GSM519417	730	1	62	Tumor	GSE20685	unknown	unknown	unknown	m6Acluster B	unknown	>53	Dead	Gene.cluster B	-10.1459	High m6Ascore
GSM519418	2920	0	41	Tumor	GSE20685	unknown	unknown	unknown	m6Acluster B	unknown	<=53	Alive	Gene.cluster A	-10.7395	High m6Ascore
GSM519419	730	1	28	Tumor	GSE20685	unknown	unknown	unknown	m6Acluster C	unknown	<=53	Dead	Gene.cluster A	-11.7636	High m6Ascore
GSM519420	2920	0	29	Tumor	GSE20685	unknown	unknown	unknown	m6Acluster A	unknown	<=53	Alive	Gene.cluster B	-10.0155	High m6Ascore
GSM519421	2920	0	46	Tumor	GSE20685	unknown	unknown	unknown	m6Acluster B	unknown	<=53	Alive	Gene.cluster C	-12.8802	High m6Ascore
GSM519422	2920	0	48	Tumor	GSE20685	unknown	unknown	unknown	m6Acluster C	unknown	<=53	Alive	Gene.cluster C	-12.3282	High m6Ascore
GSM519423	2920	0	64	Tumor	GSE20685	unknown	unknown	unknown	m6Acluster B	unknown	>53	Alive	Gene.cluster A	-9.9386	High m6Ascore
GSM519424	2920	0	48	Tumor	GSE20685	unknown	unknown	unknown	m6Acluster B	unknown	<=53	Alive	Gene.cluster C	-11.7917	High m6Ascore
GSM519425	1095	1	39	Tumor	GSE20685	unknown	unknown	unknown	m6Acluster C	unknown	<=53	Dead	Gene.cluster C	-13.4982	Low m6Ascore
GSM519426	2920	0	40	Tumor	GSE20685	unknown	unknown	unknown	m6Acluster C	unknown	<=53	Alive	Gene.cluster C	-21.8994	Low m6Ascore
GSM519427	2920	0	55	Tumor	GSE20685	unknown	unknown	unknown	m6Acluster A	unknown	>53	Alive	Gene.cluster C	-16.9956	Low m6Ascore
GSM519428	2920	0	37	Tumor	GSE20685	unknown	unknown	unknown	m6Acluster C	unknown	<=53	Alive	Gene.cluster A	-15.6657	Low m6Ascore
GSM519429	2190	0	41	Tumor	GSE20685	unknown	unknown	unknown	m6Acluster C	unknown	<=53	Alive	Gene.cluster C	-19.6235	Low m6Ascore
GSM519430	365	0	72	Tumor	GSE20685	unknown	unknown	unknown	m6Acluster B	unknown	>53	Alive	Gene.cluster C	-15.8802	Low m6Ascore
GSM519431	2190	1	51	Tumor	GSE20685	unknown	unknown	unknown	m6Acluster B	unknown	<=53	Dead	Gene.cluster C	-14.2156	Low m6Ascore
GSM519432	2190	0	59	Tumor	GSE20685	unknown	unknown	unknown	m6Acluster C	unknown	>53	Alive	Gene.cluster A	-15.7366	Low m6Ascore
GSM519433	2190	0	57	Tumor	GSE20685	unknown	unknown	unknown	m6Acluster B	unknown	>53	Alive	Gene.cluster C	-14.5146	Low m6Ascore
GSM519434	1460	1	46	Tumor	GSE20685	unknown	unknown	unknown	m6Acluster C	unknown	<=53	Dead	Gene.cluster C	-17.0381	Low m6Ascore
GSM519435	1825	0	38	Tumor	GSE20685	unknown	unknown	unknown	m6Acluster B	unknown	<=53	Alive	Gene.cluster A	-15.773	Low m6Ascore
GSM519436	1825	0	56	Tumor	GSE20685	unknown	unknown	unknown	m6Acluster C	unknown	>53	Alive	Gene.cluster C	-13.5414	Low m6Ascore
GSM519437	1825	0	50	Tumor	GSE20685	unknown	unknown	unknown	m6Acluster A	unknown	<=53	Alive	Gene.cluster C	-15.388	Low m6Ascore
GSM519438	1460	0	49	Tumor	GSE20685	unknown	unknown	unknown	m6Acluster C	unknown	<=53	Alive	Gene.cluster C	-17.3548	Low m6Ascore
GSM519439	1460	0	53	Tumor	GSE20685	unknown	unknown	unknown	m6Acluster A	unknown	<=53	Alive	Gene.cluster C	-12.9382	High m6Ascore
GSM519440	1460	0	44	Tumor	GSE20685	unknown	unknown	unknown	m6Acluster C	unknown	<=53	Alive	Gene.cluster C	-19.9684	Low m6Ascore
GSM519441	1095	0	57	Tumor	GSE20685	unknown	unknown	unknown	m6Acluster C	unknown	>53	Alive	Gene.cluster C	-16.0371	Low m6Ascore
GSM519442	1095	0	52	Tumor	GSE20685	unknown	unknown	unknown	m6Acluster C	unknown	<=53	Alive	Gene.cluster C	-21.2702	Low m6Ascore
GSM519443	2920	0	34	Tumor	GSE20685	unknown	unknown	unknown	m6Acluster C	unknown	<=53	Alive	Gene.cluster C	-17.09	Low m6Ascore
GSM615096	856	1	38	Tumor	GSE25066	Positive	Positive	Negative	m6Acluster C	NO	<=53	Dead	Gene.cluster A	-16.3192	Low m6Ascore
GSM615097	2026	0	46	Tumor	GSE25066	Positive	Positive	Negative	m6Acluster C	NO	<=53	Alive	Gene.cluster C	-15.5291	Low m6Ascore
GSM615098	2009	0	41	Tumor	GSE25066	Negative	Negative	Negative	m6Acluster B	YES	<=53	Alive	Gene.cluster B	-9.34788	High m6Ascore
GSM615099	1980	0	41	Tumor	GSE25066	Negative	Negative	Negative	m6Acluster B	YES	<=53	Alive	Gene.cluster B	-10.1464	High m6Ascore
GSM615100	577	1	36	Tumor	GSE25066	Positive	Positive	Negative	m6Acluster B	NO	<=53	Dead	Gene.cluster C	-16.2488	Low m6Ascore
GSM615101	1900	0	52	Tumor	GSE25066	Negative	Negative	Negative	m6Acluster B	YES	<=53	Alive	Gene.cluster B	-7.92482	High m6Ascore
GSM615102	997	1	38	Tumor	GSE25066	Negative	Negative	unknown	m6Acluster B	unknown	<=53	Dead	Gene.cluster B	-7.50206	High m6Ascore
GSM615103	1934	0	54	Tumor	GSE25066	unknown	unknown	unknown	m6Acluster B	unknown	>53	Alive	Gene.cluster A	-16.2877	Low m6Ascore
GSM615104	286	1	47	Tumor	GSE25066	Negative	Negative	Negative	m6Acluster A	YES	<=53	Dead	Gene.cluster A	-12.7757	High m6Ascore
GSM615105	0	1	41	Tumor	GSE25066	Positive	Positive	Positive	m6Acluster A	NO	<=53	Dead	Gene.cluster A	-18.9044	Low m6Ascore
GSM615106	1517	0	51	Tumor	GSE25066	Negative	Negative	Negative	m6Acluster A	YES	<=53	Alive	Gene.cluster B	-10.3286	High m6Ascore
GSM615107	1595	0	38	Tumor	GSE25066	Negative	Negative	Negative	m6Acluster C	YES	<=53	Alive	Gene.cluster B	-9.19174	High m6Ascore
GSM615108	1678	0	47	Tumor	GSE25066	Positive	Positive	Positive	m6Acluster A	NO	<=53	Alive	Gene.cluster A	-12.6785	High m6Ascore
GSM615109	456	1	59	Tumor	GSE25066	Negative	Negative	Negative	m6Acluster C	YES	>53	Dead	Gene.cluster B	-8.85843	High m6Ascore
GSM615110	348	1	50	Tumor	GSE25066	unknown	unknown	unknown	m6Acluster B	unknown	<=53	Dead	Gene.cluster B	-11.545	High m6Ascore
GSM615111	361	1	50	Tumor	GSE25066	Negative	Negative	Negative	m6Acluster B	YES	<=53	Dead	Gene.cluster B	-8.22068	High m6Ascore
GSM615112	669	1	63	Tumor	GSE25066	Negative	Negative	Negative	m6Acluster B	YES	>53	Dead	Gene.cluster B	-6.0533	High m6Ascore
GSM615113	112	1	43	Tumor	GSE25066	Negative	Negative	Negative	m6Acluster B	YES	<=53	Dead	Gene.cluster B	-10.4602	High m6Ascore
GSM615114	1498	0	53	Tumor	GSE25066	Positive	Positive	Negative	m6Acluster A	NO	<=53	Alive	Gene.cluster C	-15.4492	Low m6Ascore
GSM615115	55	1	44	Tumor	GSE25066	Negative	Negative	Negative	m6Acluster B	YES	<=53	Dead	Gene.cluster B	-8.70099	High m6Ascore
GSM615116	352	1	54	Tumor	GSE25066	Negative	Negative	Positive	m6Acluster C	NO	>53	Dead	Gene.cluster C	-11.7353	High m6Ascore
GSM615117	42	1	35	Tumor	GSE25066	Positive	Positive	Negative	m6Acluster B	NO	<=53	Dead	Gene.cluster B	-10.3503	High m6Ascore
GSM615118	881	0	60	Tumor	GSE25066	Negative	Negative	Negative	m6Acluster A	YES	>53	Alive	Gene.cluster B	-7.82111	High m6Ascore
GSM615119	1048	1	58	Tumor	GSE25066	Negative	Negative	Negative	m6Acluster A	YES	>53	Dead	Gene.cluster C	-12.5966	High m6Ascore
GSM615120	1718	0	53	Tumor	GSE25066	Positive	Positive	Negative	m6Acluster A	NO	<=53	Alive	Gene.cluster C	-15.6377	Low m6Ascore
GSM615121	1541	0	36	Tumor	GSE25066	Positive	Negative	unknown	m6Acluster C	NO	<=53	Alive	Gene.cluster A	-14.4775	Low m6Ascore
GSM615122	1395	0	31	Tumor	GSE25066	Positive	Positive	Negative	m6Acluster A	NO	<=53	Alive	Gene.cluster C	-15.3142	Low m6Ascore
GSM615123	1571	0	53	Tumor	GSE25066	Positive	Positive	Negative	m6Acluster B	NO	<=53	Alive	Gene.cluster A	-11.2819	High m6Ascore
GSM615124	1519	0	61	Tumor	GSE25066	Positive	Positive	Negative	m6Acluster B	NO	>53	Alive	Gene.cluster A	-14.755	Low m6Ascore
GSM615125	1487	0	44	Tumor	GSE25066	Positive	Positive	Negative	m6Acluster B	NO	<=53	Alive	Gene.cluster C	-19.3326	Low m6Ascore
GSM615126	1387	0	44	Tumor	GSE25066	Positive	Positive	Negative	m6Acluster C	NO	<=53	Alive	Gene.cluster A	-16.7892	Low m6Ascore
GSM615127	1506	0	63	Tumor	GSE25066	Positive	Negative	Negative	m6Acluster A	NO	>53	Alive	Gene.cluster A	-15.1407	Low m6Ascore
GSM615128	491	1	50	Tumor	GSE25066	Positive	Positive	Negative	m6Acluster B	NO	<=53	Dead	Gene.cluster C	-14.0069	Low m6Ascore
GSM615129	1078	0	54	Tumor	GSE25066	Positive	Positive	Negative	m6Acluster B	NO	>53	Alive	Gene.cluster A	-14.9826	Low m6Ascore
GSM615130	1467	0	45	Tumor	GSE25066	Positive	Positive	Negative	m6Acluster C	NO	<=53	Alive	Gene.cluster A	-14.942	Low m6Ascore
GSM615131	1052	0	62	Tumor	GSE25066	Positive	Positive	unknown	m6Acluster B	NO	>53	Alive	Gene.cluster C	-14.7283	Low m6Ascore
GSM615132	575	0	48	Tumor	GSE25066	Positive	Positive	unknown	m6Acluster A	NO	<=53	Alive	Gene.cluster A	-17.6702	Low m6Ascore
GSM615133	1320	0	51	Tumor	GSE25066	Positive	Positive	Negative	m6Acluster C	NO	<=53	Alive	Gene.cluster C	-16.7772	Low m6Ascore
GSM615134	1349	0	43	Tumor	GSE25066	Positive	Positive	Negative	m6Acluster B	NO	<=53	Alive	Gene.cluster C	-13.4418	Low m6Ascore
GSM615135	1402	0	59	Tumor	GSE25066	Negative	Negative	Negative	m6Acluster C	YES	>53	Alive	Gene.cluster C	-14.8335	Low m6Ascore
GSM615136	199	1	60	Tumor	GSE25066	Negative	Negative	Negative	m6Acluster B	YES	>53	Dead	Gene.cluster B	-6.97354	High m6Ascore
GSM615137	899	0	35	Tumor	GSE25066	Positive	Negative	Negative	m6Acluster C	NO	<=53	Alive	Gene.cluster C	-11.7774	High m6Ascore
GSM615138	1425	0	35	Tumor	GSE25066	Positive	Negative	Negative	m6Acluster B	NO	<=53	Alive	Gene.cluster C	-14.5141	Low m6Ascore
GSM615139	861	0	56	Tumor	GSE25066	Negative	Negative	unknown	m6Acluster A	unknown	>53	Alive	Gene.cluster B	-11.1994	High m6Ascore
GSM615140	377	0	39	Tumor	GSE25066	Negative	Negative	Positive	m6Acluster B	NO	<=53	Alive	Gene.cluster B	-13.2496	High m6Ascore
GSM615141	1182	0	59	Tumor	GSE25066	unknown	unknown	unknown	m6Acluster B	unknown	>53	Alive	Gene.cluster B	-11.7157	High m6Ascore
GSM615142	1075	0	52	Tumor	GSE25066	Positive	Positive	Negative	m6Acluster B	NO	<=53	Alive	Gene.cluster A	-15.4668	Low m6Ascore
GSM615143	1059	0	43	Tumor	GSE25066	Negative	Positive	unknown	m6Acluster A	NO	<=53	Alive	Gene.cluster B	-9.63316	High m6Ascore
GSM615144	1190	0	62	Tumor	GSE25066	Positive	Positive	Negative	m6Acluster A	NO	>53	Alive	Gene.cluster A	-18.882	Low m6Ascore
GSM615145	328	0	56	Tumor	GSE25066	Negative	Negative	Negative	m6Acluster B	YES	>53	Alive	Gene.cluster B	-9.71633	High m6Ascore
GSM615146	925	0	39	Tumor	GSE25066	Negative	Negative	Negative	m6Acluster B	YES	<=53	Alive	Gene.cluster B	-10.2284	High m6Ascore
GSM615147	1048	0	60	Tumor	GSE25066	Positive	Positive	unknown	m6Acluster A	NO	>53	Alive	Gene.cluster C	-14.6573	Low m6Ascore
GSM615148	974	0	40	Tumor	GSE25066	Negative	Negative	Negative	m6Acluster C	YES	<=53	Alive	Gene.cluster B	-9.84249	High m6Ascore
GSM615149	261	1	44	Tumor	GSE25066	Negative	Negative	Negative	m6Acluster B	YES	<=53	Dead	Gene.cluster B	-10.4873	High m6Ascore
GSM615150	794	0	44	Tumor	GSE25066	Positive	Positive	Negative	m6Acluster B	NO	<=53	Alive	Gene.cluster C	-15.6458	Low m6Ascore
GSM615151	334	0	45	Tumor	GSE25066	Negative	Negative	Negative	m6Acluster A	YES	<=53	Alive	Gene.cluster B	-8.31737	High m6Ascore
GSM615152	1021	0	44	Tumor	GSE25066	unknown	unknown	unknown	m6Acluster B	unknown	<=53	Alive	Gene.cluster B	-10.8139	High m6Ascore
GSM615153	975	0	64	Tumor	GSE25066	Positive	Positive	Negative	m6Acluster B	NO	>53	Alive	Gene.cluster A	-14.249	Low m6Ascore
GSM615154	923	0	41	Tumor	GSE25066	Negative	Negative	Negative	m6Acluster C	YES	<=53	Alive	Gene.cluster B	-10.4181	High m6Ascore
GSM615155	1165	0	32	Tumor	GSE25066	Positive	Positive	Negative	m6Acluster B	NO	<=53	Alive	Gene.cluster A	-12.6438	High m6Ascore
GSM615156	739	0	38	Tumor	GSE25066	Negative	Negative	Negative	m6Acluster A	YES	<=53	Alive	Gene.cluster B	-11.0195	High m6Ascore
GSM615157	746	0	46	Tumor	GSE25066	Positive	unknown	Negative	m6Acluster A	NO	<=53	Alive	Gene.cluster A	-14.0847	Low m6Ascore
GSM615158	830	0	60	Tumor	GSE25066	Positive	Positive	Negative	m6Acluster A	NO	>53	Alive	Gene.cluster C	-15.1283	Low m6Ascore
GSM615159	618	0	45	Tumor	GSE25066	Negative	Positive	unknown	m6Acluster A	NO	<=53	Alive	Gene.cluster B	-11.6917	High m6Ascore
GSM615160	140	1	38	Tumor	GSE25066	Negative	Negative	Negative	m6Acluster B	YES	<=53	Dead	Gene.cluster B	-8.19936	High m6Ascore
GSM615161	876	0	44	Tumor	GSE25066	unknown	unknown	Negative	m6Acluster B	unknown	<=53	Alive	Gene.cluster A	-16.1869	Low m6Ascore
GSM615162	915	0	42	Tumor	GSE25066	Positive	Positive	Negative	m6Acluster C	NO	<=53	Alive	Gene.cluster C	-19.2271	Low m6Ascore
GSM615163	191	0	43	Tumor	GSE25066	Positive	Positive	Negative	m6Acluster B	NO	<=53	Alive	Gene.cluster A	-14.8163	Low m6Ascore
GSM615164	523	0	42	Tumor	GSE25066	Negative	Negative	Negative	m6Acluster B	YES	<=53	Alive	Gene.cluster B	-9.74983	High m6Ascore
GSM615165	599	0	43	Tumor	GSE25066	Positive	Negative	Negative	m6Acluster C	NO	<=53	Alive	Gene.cluster A	-14.0456	Low m6Ascore
GSM615166	773	0	41	Tumor	GSE25066	Positive	Positive	unknown	m6Acluster A	NO	<=53	Alive	Gene.cluster C	-13.4743	Low m6Ascore
GSM615167	414	0	34	Tumor	GSE25066	Negative	Negative	Negative	m6Acluster C	YES	<=53	Alive	Gene.cluster C	-14.0221	Low m6Ascore
GSM615168	497	0	50	Tumor	GSE25066	Positive	Positive	Negative	m6Acluster C	NO	<=53	Alive	Gene.cluster C	-15.708	Low m6Ascore
GSM615169	826	0	48	Tumor	GSE25066	Negative	Negative	Negative	m6Acluster C	YES	<=53	Alive	Gene.cluster C	-14.0848	Low m6Ascore
GSM615170	802	0	46	Tumor	GSE25066	Positive	Positive	unknown	m6Acluster B	NO	<=53	Alive	Gene.cluster C	-16.7347	Low m6Ascore
GSM615171	872	0	43	Tumor	GSE25066	Negative	Negative	unknown	m6Acluster B	unknown	<=53	Alive	Gene.cluster C	-12.698	High m6Ascore
GSM615172	944	0	60	Tumor	GSE25066	Positive	Positive	Negative	m6Acluster C	NO	>53	Alive	Gene.cluster C	-15.8308	Low m6Ascore
GSM615173	761	0	48	Tumor	GSE25066	Positive	Positive	Negative	m6Acluster A	NO	<=53	Alive	Gene.cluster C	-16.3208	Low m6Ascore
GSM615174	904	0	42	Tumor	GSE25066	Positive	Positive	Negative	m6Acluster B	NO	<=53	Alive	Gene.cluster A	-13.3644	Low m6Ascore
GSM615175	922	0	42	Tumor	GSE25066	Negative	Negative	Negative	m6Acluster B	YES	<=53	Alive	Gene.cluster B	-13.2849	High m6Ascore
GSM615176	895	0	46	Tumor	GSE25066	Positive	Positive	Negative	m6Acluster C	NO	<=53	Alive	Gene.cluster C	-16.8876	Low m6Ascore
GSM615177	637	0	50	Tumor	GSE25066	Positive	Positive	Negative	m6Acluster B	NO	<=53	Alive	Gene.cluster A	-20.702	Low m6Ascore
GSM615178	707	0	39	Tumor	GSE25066	Negative	Positive	Negative	m6Acluster B	NO	<=53	Alive	Gene.cluster B	-8.45999	High m6Ascore
GSM615179	2585	0	56	Tumor	GSE25066	Positive	Positive	Negative	m6Acluster C	NO	>53	Alive	Gene.cluster C	-20.2172	Low m6Ascore
GSM615180	2102	0	47	Tumor	GSE25066	Positive	Positive	Negative	m6Acluster C	NO	<=53	Alive	Gene.cluster C	-17.6551	Low m6Ascore
GSM615181	2699	0	49	Tumor	GSE25066	Negative	Negative	Negative	m6Acluster B	YES	<=53	Alive	Gene.cluster B	-9.96956	High m6Ascore
GSM615182	2715	0	75	Tumor	GSE25066	Negative	Negative	Negative	m6Acluster A	YES	>53	Alive	Gene.cluster C	-12.8713	High m6Ascore
GSM615183	2449	0	34	Tumor	GSE25066	Positive	Positive	Negative	m6Acluster C	NO	<=53	Alive	Gene.cluster A	-14.355	Low m6Ascore
GSM615184	2665	0	51	Tumor	GSE25066	Negative	Positive	Negative	m6Acluster B	NO	<=53	Alive	Gene.cluster B	-10.1911	High m6Ascore
GSM615185	2041	1	65	Tumor	GSE25066	Negative	Negative	Negative	m6Acluster B	YES	>53	Dead	Gene.cluster B	-10.0554	High m6Ascore
GSM615186	2431	0	51	Tumor	GSE25066	Positive	Negative	Negative	m6Acluster A	NO	<=53	Alive	Gene.cluster A	-12.7391	High m6Ascore
GSM615187	2494	0	66	Tumor	GSE25066	Positive	Positive	Negative	m6Acluster C	NO	>53	Alive	Gene.cluster C	-18.0037	Low m6Ascore
GSM615188	2087	0	61	Tumor	GSE25066	Negative	Negative	Negative	m6Acluster C	YES	>53	Alive	Gene.cluster A	-15.2545	Low m6Ascore
GSM615189	418	1	65	Tumor	GSE25066	Negative	Positive	Negative	m6Acluster A	NO	>53	Dead	Gene.cluster C	-12.1533	High m6Ascore
GSM615190	2601	0	37	Tumor	GSE25066	Negative	Negative	Negative	m6Acluster B	YES	<=53	Alive	Gene.cluster B	-9.52036	High m6Ascore
GSM615191	2314	0	37	Tumor	GSE25066	Negative	Positive	Negative	m6Acluster B	NO	<=53	Alive	Gene.cluster B	-8.58001	High m6Ascore
GSM615192	2674	0	51	Tumor	GSE25066	Positive	Positive	Negative	m6Acluster B	NO	<=53	Alive	Gene.cluster A	-17.4618	Low m6Ascore
GSM615193	2350	0	40	Tumor	GSE25066	Negative	Negative	Negative	m6Acluster C	YES	<=53	Alive	Gene.cluster C	-17.1637	Low m6Ascore
GSM615194	2379	0	61	Tumor	GSE25066	Negative	Positive	Negative	m6Acluster A	NO	>53	Alive	Gene.cluster B	-8.13239	High m6Ascore
GSM615195	279	1	29	Tumor	GSE25066	Negative	Negative	Negative	m6Acluster B	YES	<=53	Dead	Gene.cluster B	-9.5878	High m6Ascore
GSM615196	2360	0	61	Tumor	GSE25066	Positive	Positive	Negative	m6Acluster A	NO	>53	Alive	Gene.cluster A	-10.8255	High m6Ascore
GSM615197	2413	0	67	Tumor	GSE25066	Negative	Negative	Negative	m6Acluster C	YES	>53	Alive	Gene.cluster C	-13.8536	Low m6Ascore
GSM615198	2406	0	57	Tumor	GSE25066	Positive	Positive	Negative	m6Acluster B	NO	>53	Alive	Gene.cluster A	-19.7142	Low m6Ascore
GSM615199	2385	0	38	Tumor	GSE25066	Positive	Positive	Negative	m6Acluster A	NO	<=53	Alive	Gene.cluster C	-16.3033	Low m6Ascore
GSM615200	1260	1	49	Tumor	GSE25066	Positive	Negative	Negative	m6Acluster C	NO	<=53	Dead	Gene.cluster A	-10.4877	High m6Ascore
GSM615201	2231	0	41	Tumor	GSE25066	Positive	Negative	Negative	m6Acluster A	NO	<=53	Alive	Gene.cluster A	-15.769	Low m6Ascore
GSM615202	2355	0	42	Tumor	GSE25066	Negative	Positive	Negative	m6Acluster C	NO	<=53	Alive	Gene.cluster A	-13.335	Low m6Ascore
GSM615203	2374	0	73	Tumor	GSE25066	Positive	Positive	Negative	m6Acluster A	NO	>53	Alive	Gene.cluster C	-17.1761	Low m6Ascore
GSM615204	2304	0	46	Tumor	GSE25066	Positive	Positive	Negative	m6Acluster A	NO	<=53	Alive	Gene.cluster C	-16.692	Low m6Ascore
GSM615205	2212	0	68	Tumor	GSE25066	Positive	Negative	Negative	m6Acluster A	NO	>53	Alive	Gene.cluster A	-13.9929	Low m6Ascore
GSM615206	2128	0	47	Tumor	GSE25066	Positive	Positive	Negative	m6Acluster C	NO	<=53	Alive	Gene.cluster A	-14.1478	Low m6Ascore
GSM615207	2114	0	42	Tumor	GSE25066	Positive	Positive	Negative	m6Acluster C	NO	<=53	Alive	Gene.cluster C	-15.8265	Low m6Ascore
GSM615208	2143	0	69	Tumor	GSE25066	Positive	Positive	Negative	m6Acluster C	NO	>53	Alive	Gene.cluster C	-23.8383	Low m6Ascore
GSM615209	779	1	56	Tumor	GSE25066	Negative	Negative	Negative	m6Acluster B	YES	>53	Dead	Gene.cluster B	-10.3933	High m6Ascore
GSM615210	2151	0	75	Tumor	GSE25066	Positive	Negative	Negative	m6Acluster C	NO	>53	Alive	Gene.cluster C	-18.7944	Low m6Ascore
GSM615211	1877	0	35	Tumor	GSE25066	Negative	Negative	Negative	m6Acluster A	YES	<=53	Alive	Gene.cluster B	-9.44714	High m6Ascore
GSM615212	1710	0	48	Tumor	GSE25066	Negative	Negative	Negative	m6Acluster A	YES	<=53	Alive	Gene.cluster B	-9.91762	High m6Ascore
GSM615213	1688	0	53	Tumor	GSE25066	Negative	Negative	Negative	m6Acluster B	YES	<=53	Alive	Gene.cluster B	-10.739	High m6Ascore
GSM615214	2021	0	54	Tumor	GSE25066	Positive	Negative	Negative	m6Acluster C	NO	>53	Alive	Gene.cluster A	-14.3921	Low m6Ascore
GSM615215	1917	0	44	Tumor	GSE25066	Negative	Negative	Negative	m6Acluster A	YES	<=53	Alive	Gene.cluster A	-12.7491	High m6Ascore
GSM615216	974	1	58	Tumor	GSE25066	Positive	Positive	Negative	m6Acluster A	NO	>53	Dead	Gene.cluster A	-14.2638	Low m6Ascore
GSM615217	2060	0	52	Tumor	GSE25066	Positive	Positive	Negative	m6Acluster C	NO	<=53	Alive	Gene.cluster A	-15.1395	Low m6Ascore
GSM615218	210	1	56	Tumor	GSE25066	Negative	Negative	Negative	m6Acluster B	YES	>53	Dead	Gene.cluster B	-10.2807	High m6Ascore
GSM615219	176	0	38	Tumor	GSE25066	Positive	Negative	Negative	m6Acluster B	NO	<=53	Alive	Gene.cluster A	-12.4892	High m6Ascore
GSM615220	1813	0	31	Tumor	GSE25066	Positive	Positive	Negative	m6Acluster C	NO	<=53	Alive	Gene.cluster A	-13.7579	Low m6Ascore
GSM615221	1227	1	38	Tumor	GSE25066	Positive	Positive	Negative	m6Acluster C	NO	<=53	Dead	Gene.cluster A	-13.0712	High m6Ascore
GSM615222	561	1	48	Tumor	GSE25066	Positive	Negative	Negative	m6Acluster B	NO	<=53	Dead	Gene.cluster C	-16.0913	Low m6Ascore
GSM615223	228	1	57	Tumor	GSE25066	Negative	Negative	Negative	m6Acluster C	YES	>53	Dead	Gene.cluster B	-8.82426	High m6Ascore
GSM615224	1678	0	52	Tumor	GSE25066	Positive	Positive	Negative	m6Acluster A	NO	<=53	Alive	Gene.cluster C	-17.0948	Low m6Ascore
GSM615225	1580	0	60	Tumor	GSE25066	Negative	Negative	Negative	m6Acluster A	YES	>53	Alive	Gene.cluster B	-10.3297	High m6Ascore
GSM615226	1598	0	58	Tumor	GSE25066	Positive	Negative	Negative	m6Acluster C	NO	>53	Alive	Gene.cluster C	-16.1954	Low m6Ascore
GSM615227	1892	0	52	Tumor	GSE25066	Positive	Positive	Negative	m6Acluster A	NO	<=53	Alive	Gene.cluster A	-15.2022	Low m6Ascore
GSM615228	1672	0	42	Tumor	GSE25066	Positive	Negative	Negative	m6Acluster C	NO	<=53	Alive	Gene.cluster C	-19.0168	Low m6Ascore
GSM615229	1785	0	48	Tumor	GSE25066	Negative	Negative	Negative	m6Acluster C	YES	<=53	Alive	Gene.cluster C	-16.2291	Low m6Ascore
GSM615230	1463	0	39	Tumor	GSE25066	Positive	Positive	Negative	m6Acluster B	NO	<=53	Alive	Gene.cluster A	-11.0859	High m6Ascore
GSM615231	1653	0	49	Tumor	GSE25066	Positive	Positive	Negative	m6Acluster C	NO	<=53	Alive	Gene.cluster C	-15.32	Low m6Ascore
GSM615232	1419	0	56	Tumor	GSE25066	Positive	Positive	Negative	m6Acluster A	NO	>53	Alive	Gene.cluster C	-15.9619	Low m6Ascore
GSM615233	289	1	72	Tumor	GSE25066	Positive	Positive	Negative	m6Acluster C	NO	>53	Dead	Gene.cluster C	-16.8777	Low m6Ascore
GSM615234	1587	0	45	Tumor	GSE25066	Positive	Negative	Negative	m6Acluster C	NO	<=53	Alive	Gene.cluster A	-15.4543	Low m6Ascore
GSM615235	1784	0	67	Tumor	GSE25066	Positive	Negative	Negative	m6Acluster A	NO	>53	Alive	Gene.cluster A	-11.4285	High m6Ascore
GSM615236	1050	1	71	Tumor	GSE25066	Positive	Positive	Negative	m6Acluster A	NO	>53	Dead	Gene.cluster C	-16.0531	Low m6Ascore
GSM615237	1670	0	45	Tumor	GSE25066	Positive	Positive	Negative	m6Acluster C	NO	<=53	Alive	Gene.cluster C	-17.5626	Low m6Ascore
GSM615238	1545	0	44	Tumor	GSE25066	Positive	Negative	Negative	m6Acluster C	NO	<=53	Alive	Gene.cluster A	-16.7548	Low m6Ascore
GSM615239	1500	0	46	Tumor	GSE25066	Positive	Negative	Negative	m6Acluster B	NO	<=53	Alive	Gene.cluster A	-13.6906	Low m6Ascore
GSM615240	1388	0	48	Tumor	GSE25066	Negative	Negative	Negative	m6Acluster A	YES	<=53	Alive	Gene.cluster B	-7.84186	High m6Ascore
GSM615241	19	1	63	Tumor	GSE25066	Positive	Negative	Negative	m6Acluster A	NO	>53	Dead	Gene.cluster A	-13.3981	Low m6Ascore
GSM615242	1637	0	46	Tumor	GSE25066	Negative	Negative	Negative	m6Acluster C	YES	<=53	Alive	Gene.cluster B	-8.71874	High m6Ascore
GSM615243	1569	0	46	Tumor	GSE25066	Positive	Positive	Negative	m6Acluster A	NO	<=53	Alive	Gene.cluster A	-11.7176	High m6Ascore
GSM615244	1483	0	51	Tumor	GSE25066	Negative	Negative	Negative	m6Acluster C	YES	<=53	Alive	Gene.cluster C	-11.4016	High m6Ascore
GSM615245	823	1	36	Tumor	GSE25066	Positive	Positive	Negative	m6Acluster C	NO	<=53	Dead	Gene.cluster C	-21.1691	Low m6Ascore
GSM615246	1658	0	26	Tumor	GSE25066	Positive	Positive	Negative	m6Acluster B	NO	<=53	Alive	Gene.cluster C	-15.2996	Low m6Ascore
GSM615247	1470	0	40	Tumor	GSE25066	Positive	Positive	Negative	m6Acluster C	NO	<=53	Alive	Gene.cluster C	-14.1871	Low m6Ascore
GSM615248	1173	0	42	Tumor	GSE25066	Positive	Positive	Negative	m6Acluster B	NO	<=53	Alive	Gene.cluster B	-8.52404	High m6Ascore
GSM615249	1371	1	67	Tumor	GSE25066	Positive	Positive	Negative	m6Acluster A	NO	>53	Dead	Gene.cluster A	-13.5795	Low m6Ascore
GSM615250	1367	0	63	Tumor	GSE25066	Negative	Negative	Negative	m6Acluster C	YES	>53	Alive	Gene.cluster C	-12.0905	High m6Ascore
GSM615251	1370	0	44	Tumor	GSE25066	Negative	Negative	Negative	m6Acluster B	YES	<=53	Alive	Gene.cluster B	-9.62493	High m6Ascore
GSM615252	1531	0	54	Tumor	GSE25066	Positive	Negative	Negative	m6Acluster B	NO	>53	Alive	Gene.cluster C	-18.3715	Low m6Ascore
GSM615253	1481	0	41	Tumor	GSE25066	Positive	Negative	Negative	m6Acluster B	NO	<=53	Alive	Gene.cluster A	-16.2006	Low m6Ascore
GSM615254	1516	0	49	Tumor	GSE25066	Positive	Positive	Negative	m6Acluster C	NO	<=53	Alive	Gene.cluster C	-16.2628	Low m6Ascore
GSM615255	312	1	39	Tumor	GSE25066	Negative	Negative	Negative	m6Acluster B	YES	<=53	Dead	Gene.cluster B	-8.75176	High m6Ascore
GSM615256	1331	0	51	Tumor	GSE25066	Positive	Negative	Negative	m6Acluster C	NO	<=53	Alive	Gene.cluster A	-12.8109	High m6Ascore
GSM615257	1292	0	59	Tumor	GSE25066	Positive	Positive	Negative	m6Acluster C	NO	>53	Alive	Gene.cluster C	-16.4714	Low m6Ascore
GSM615258	1266	0	55	Tumor	GSE25066	Positive	Positive	Negative	m6Acluster C	NO	>53	Alive	Gene.cluster C	-16.2431	Low m6Ascore
GSM615259	1378	0	62	Tumor	GSE25066	Positive	Positive	Negative	m6Acluster C	NO	>53	Alive	Gene.cluster A	-14.6423	Low m6Ascore
GSM615260	639	1	56	Tumor	GSE25066	Positive	Positive	Negative	m6Acluster B	NO	>53	Dead	Gene.cluster B	-8.76249	High m6Ascore
GSM615261	1085	0	58	Tumor	GSE25066	Positive	Positive	Negative	m6Acluster C	NO	>53	Alive	Gene.cluster C	-14.0267	Low m6Ascore
GSM615262	1746	0	42	Tumor	GSE25066	Positive	Positive	Negative	m6Acluster C	NO	<=53	Alive	Gene.cluster C	-17.6272	Low m6Ascore
GSM615263	1092	0	61	Tumor	GSE25066	Negative	Negative	Negative	m6Acluster C	YES	>53	Alive	Gene.cluster C	-13.3097	High m6Ascore
GSM615264	1362	0	45	Tumor	GSE25066	Negative	Negative	Negative	m6Acluster A	YES	<=53	Alive	Gene.cluster B	-10.6325	High m6Ascore
GSM615265	1345	0	63	Tumor	GSE25066	Negative	Negative	Negative	m6Acluster C	YES	>53	Alive	Gene.cluster C	-15.3843	Low m6Ascore
GSM615266	1284	0	60	Tumor	GSE25066	Positive	Positive	Negative	m6Acluster C	NO	>53	Alive	Gene.cluster C	-16.5665	Low m6Ascore
GSM615267	1196	1	42	Tumor	GSE25066	Positive	Negative	Negative	m6Acluster B	NO	<=53	Dead	Gene.cluster A	-11.8458	High m6Ascore
GSM615268	1279	0	35	Tumor	GSE25066	Positive	Negative	Negative	m6Acluster C	NO	<=53	Alive	Gene.cluster C	-15.9094	Low m6Ascore
GSM615269	1198	0	40	Tumor	GSE25066	Positive	Positive	Negative	m6Acluster A	NO	<=53	Alive	Gene.cluster A	-17.6324	Low m6Ascore
GSM615270	1356	0	38	Tumor	GSE25066	Negative	Negative	Negative	m6Acluster B	YES	<=53	Alive	Gene.cluster B	-10.9033	High m6Ascore
GSM615271	687	1	44	Tumor	GSE25066	Positive	Positive	Negative	m6Acluster B	NO	<=53	Dead	Gene.cluster C	-10.105	High m6Ascore
GSM615272	1378	0	63	Tumor	GSE25066	Positive	Positive	Negative	m6Acluster A	NO	>53	Alive	Gene.cluster A	-16.4377	Low m6Ascore
GSM615273	833	0	48	Tumor	GSE25066	Positive	Positive	Negative	m6Acluster A	NO	<=53	Alive	Gene.cluster A	-13.2222	High m6Ascore
GSM615274	290	1	68	Tumor	GSE25066	Positive	Positive	Negative	m6Acluster C	NO	>53	Dead	Gene.cluster B	-10.6415	High m6Ascore
GSM615275	875	1	60	Tumor	GSE25066	Negative	Negative	Negative	m6Acluster B	YES	>53	Dead	Gene.cluster B	-10.6335	High m6Ascore
GSM615276	1194	0	52	Tumor	GSE25066	Negative	Negative	Negative	m6Acluster B	YES	<=53	Alive	Gene.cluster B	-11.2683	High m6Ascore
GSM615277	1309	0	50	Tumor	GSE25066	Positive	Positive	Negative	m6Acluster C	NO	<=53	Alive	Gene.cluster C	-17.9378	Low m6Ascore
GSM615278	1186	0	47	Tumor	GSE25066	Positive	Positive	Negative	m6Acluster C	NO	<=53	Alive	Gene.cluster C	-14.9436	Low m6Ascore
GSM615279	799	1	50	Tumor	GSE25066	Positive	Positive	Negative	m6Acluster A	NO	<=53	Dead	Gene.cluster A	-13.7561	Low m6Ascore
GSM615280	1258	0	41	Tumor	GSE25066	Positive	Positive	Negative	m6Acluster A	NO	<=53	Alive	Gene.cluster A	-11.1735	High m6Ascore
GSM615281	908	0	44	Tumor	GSE25066	Positive	Negative	Negative	m6Acluster A	NO	<=53	Alive	Gene.cluster A	-16.0221	Low m6Ascore
GSM615282	1098	0	60	Tumor	GSE25066	Positive	Negative	Negative	m6Acluster C	NO	>53	Alive	Gene.cluster A	-12.3745	High m6Ascore
GSM615283	1163	0	57	Tumor	GSE25066	Positive	Negative	Negative	m6Acluster B	NO	>53	Alive	Gene.cluster A	-12.3755	High m6Ascore
GSM615284	1037	0	50	Tumor	GSE25066	Negative	Negative	Negative	m6Acluster C	YES	<=53	Alive	Gene.cluster B	-11.8201	High m6Ascore
GSM615285	1229	0	44	Tumor	GSE25066	Positive	Positive	Negative	m6Acluster C	NO	<=53	Alive	Gene.cluster A	-23.6107	Low m6Ascore
GSM615286	1153	0	62	Tumor	GSE25066	Positive	Negative	Negative	m6Acluster B	NO	>53	Alive	Gene.cluster A	-15.4773	Low m6Ascore
GSM615287	627	1	50	Tumor	GSE25066	Negative	Negative	Negative	m6Acluster C	YES	<=53	Dead	Gene.cluster C	-13.9736	Low m6Ascore
GSM615288	950	0	38	Tumor	GSE25066	Negative	Negative	Negative	m6Acluster B	YES	<=53	Alive	Gene.cluster B	-10.9998	High m6Ascore
GSM615289	1105	0	46	Tumor	GSE25066	Positive	Positive	Negative	m6Acluster B	NO	<=53	Alive	Gene.cluster A	-13.6154	Low m6Ascore
GSM615290	1150	0	66	Tumor	GSE25066	Positive	Positive	Negative	m6Acluster B	NO	>53	Alive	Gene.cluster B	-8.4185	High m6Ascore
GSM615291	259	1	59	Tumor	GSE25066	Negative	Negative	Negative	m6Acluster B	YES	>53	Dead	Gene.cluster B	-10.8901	High m6Ascore
GSM615292	865	0	47	Tumor	GSE25066	Positive	Positive	Negative	m6Acluster C	NO	<=53	Alive	Gene.cluster C	-16.2876	Low m6Ascore
GSM615293	501	1	31	Tumor	GSE25066	Negative	Negative	Negative	m6Acluster B	YES	<=53	Dead	Gene.cluster B	-6.20258	High m6Ascore
GSM615294	1112	0	45	Tumor	GSE25066	Positive	Negative	Negative	m6Acluster A	NO	<=53	Alive	Gene.cluster A	-11.0026	High m6Ascore
GSM615295	677	0	53	Tumor	GSE25066	Negative	Negative	Negative	m6Acluster C	YES	<=53	Alive	Gene.cluster C	-16.7056	Low m6Ascore
GSM615296	768	0	46	Tumor	GSE25066	Positive	Positive	Negative	m6Acluster A	NO	<=53	Alive	Gene.cluster A	-14.6523	Low m6Ascore
GSM615297	854	1	58	Tumor	GSE25066	Negative	Negative	Negative	m6Acluster C	YES	>53	Dead	Gene.cluster C	-12.4431	High m6Ascore
GSM615298	1091	0	40	Tumor	GSE25066	Positive	Positive	Negative	m6Acluster C	NO	<=53	Alive	Gene.cluster C	-16.1101	Low m6Ascore
GSM615299	973	0	47	Tumor	GSE25066	Positive	Positive	Negative	m6Acluster C	NO	<=53	Alive	Gene.cluster C	-16.1501	Low m6Ascore
GSM615300	688	0	57	Tumor	GSE25066	Negative	Negative	Negative	m6Acluster B	YES	>53	Alive	Gene.cluster B	-10.5565	High m6Ascore
GSM615301	931	1	62	Tumor	GSE25066	Negative	Negative	Negative	m6Acluster B	YES	>53	Dead	Gene.cluster B	-10.2338	High m6Ascore
GSM615302	676	0	55	Tumor	GSE25066	Positive	Negative	Negative	m6Acluster B	NO	>53	Alive	Gene.cluster A	-12.9161	High m6Ascore
GSM615303	856	0	68	Tumor	GSE25066	Negative	Negative	Negative	m6Acluster B	YES	>53	Alive	Gene.cluster B	-10.0995	High m6Ascore
GSM615304	699	0	57	Tumor	GSE25066	Positive	Positive	Negative	m6Acluster A	NO	>53	Alive	Gene.cluster A	-12.745	High m6Ascore
GSM615305	967	1	39	Tumor	GSE25066	Positive	Negative	Negative	m6Acluster C	NO	<=53	Dead	Gene.cluster C	-20.3498	Low m6Ascore
GSM615306	664	1	58	Tumor	GSE25066	Positive	Positive	Negative	m6Acluster A	NO	>53	Dead	Gene.cluster C	-15.5359	Low m6Ascore
GSM615307	1028	0	32	Tumor	GSE25066	Negative	Negative	Negative	m6Acluster C	YES	<=53	Alive	Gene.cluster B	-11.0125	High m6Ascore
GSM615308	1005	0	51	Tumor	GSE25066	Positive	Positive	Negative	m6Acluster C	NO	<=53	Alive	Gene.cluster A	-15.0328	Low m6Ascore
GSM615309	673	1	45	Tumor	GSE25066	Positive	Positive	Negative	m6Acluster B	NO	<=53	Dead	Gene.cluster A	-13.2628	High m6Ascore
GSM615310	853	0	64	Tumor	GSE25066	Positive	Negative	Negative	m6Acluster B	NO	>53	Alive	Gene.cluster B	-9.75011	High m6Ascore
GSM615311	983	0	34	Tumor	GSE25066	Positive	Positive	Negative	m6Acluster A	NO	<=53	Alive	Gene.cluster A	-14.5588	Low m6Ascore
GSM615312	623	1	51	Tumor	GSE25066	Negative	Positive	Negative	m6Acluster C	NO	<=53	Dead	Gene.cluster B	-9.49263	High m6Ascore
GSM615313	955	0	50	Tumor	GSE25066	Positive	Positive	Negative	m6Acluster C	NO	<=53	Alive	Gene.cluster C	-14.7104	Low m6Ascore
GSM615314	826	0	71	Tumor	GSE25066	Positive	Positive	Negative	m6Acluster B	NO	>53	Alive	Gene.cluster A	-14.5588	Low m6Ascore
GSM615315	325	1	32	Tumor	GSE25066	Negative	Negative	Negative	m6Acluster C	YES	<=53	Dead	Gene.cluster B	-8.55802	High m6Ascore
GSM615316	688	0	67	Tumor	GSE25066	Positive	Negative	Negative	m6Acluster B	NO	>53	Alive	Gene.cluster C	-15.758	Low m6Ascore
GSM615317	986	0	47	Tumor	GSE25066	Negative	Negative	Negative	m6Acluster B	YES	<=53	Alive	Gene.cluster B	-7.58369	High m6Ascore
GSM615318	865	0	47	Tumor	GSE25066	Positive	Positive	Negative	m6Acluster A	NO	<=53	Alive	Gene.cluster C	-17.273	Low m6Ascore
GSM615319	831	1	63	Tumor	GSE25066	Negative	Negative	Negative	m6Acluster B	YES	>53	Dead	Gene.cluster C	-13.5065	Low m6Ascore
GSM615320	493	1	40	Tumor	GSE25066	Negative	Negative	Negative	m6Acluster A	YES	<=53	Dead	Gene.cluster B	-9.79231	High m6Ascore
GSM615321	918	0	50	Tumor	GSE25066	Negative	Negative	Negative	m6Acluster B	YES	<=53	Alive	Gene.cluster B	-10.3188	High m6Ascore
GSM615322	292	1	52	Tumor	GSE25066	Negative	Negative	Negative	m6Acluster C	YES	<=53	Dead	Gene.cluster B	-10.3965	High m6Ascore
GSM615323	687	0	32	Tumor	GSE25066	Negative	Negative	Negative	m6Acluster C	YES	<=53	Alive	Gene.cluster C	-13.8303	Low m6Ascore
GSM615324	896	0	49	Tumor	GSE25066	Negative	Negative	Negative	m6Acluster C	YES	<=53	Alive	Gene.cluster B	-11.4743	High m6Ascore
GSM615325	783	0	43	Tumor	GSE25066	Negative	Negative	Negative	m6Acluster B	YES	<=53	Alive	Gene.cluster B	-8.60371	High m6Ascore
GSM615326	905	0	57	Tumor	GSE25066	Positive	Negative	Negative	m6Acluster A	NO	>53	Alive	Gene.cluster B	-8.56247	High m6Ascore
GSM615327	925	1	65	Tumor	GSE25066	Negative	Negative	Negative	m6Acluster B	YES	>53	Dead	Gene.cluster B	-10.9117	High m6Ascore
GSM615328	860	0	45	Tumor	GSE25066	Positive	Positive	Negative	m6Acluster C	NO	<=53	Alive	Gene.cluster A	-16.5561	Low m6Ascore
GSM615329	752	0	41	Tumor	GSE25066	Positive	Positive	Negative	m6Acluster A	NO	<=53	Alive	Gene.cluster C	-14.9117	Low m6Ascore
GSM615330	291	1	65	Tumor	GSE25066	Negative	Negative	Negative	m6Acluster C	YES	>53	Dead	Gene.cluster A	-9.4995	High m6Ascore
GSM615331	799	0	61	Tumor	GSE25066	Positive	Positive	Negative	m6Acluster B	NO	>53	Alive	Gene.cluster C	-13.1366	High m6Ascore
GSM615332	525	1	66	Tumor	GSE25066	Positive	Negative	Negative	m6Acluster B	NO	>53	Dead	Gene.cluster A	-13.177	High m6Ascore
GSM615333	815	0	48	Tumor	GSE25066	Negative	Positive	Negative	m6Acluster C	NO	<=53	Alive	Gene.cluster B	-10.4869	High m6Ascore
GSM615334	802	0	61	Tumor	GSE25066	Negative	Negative	Negative	m6Acluster B	YES	>53	Alive	Gene.cluster B	-8.22918	High m6Ascore
GSM615335	337	1	51	Tumor	GSE25066	Negative	Negative	Negative	m6Acluster B	YES	<=53	Dead	Gene.cluster B	-11.2715	High m6Ascore
GSM615336	825	0	49	Tumor	GSE25066	Negative	Negative	Negative	m6Acluster B	YES	<=53	Alive	Gene.cluster B	-7.85177	High m6Ascore
GSM615337	796	0	46	Tumor	GSE25066	Positive	Positive	Negative	m6Acluster C	NO	<=53	Alive	Gene.cluster C	-19.843	Low m6Ascore
GSM615338	753	0	57	Tumor	GSE25066	Negative	Negative	Negative	m6Acluster A	YES	>53	Alive	Gene.cluster B	-9.07677	High m6Ascore
GSM615339	792	0	58	Tumor	GSE25066	Positive	Positive	Negative	m6Acluster C	NO	>53	Alive	Gene.cluster A	-14.491	Low m6Ascore
GSM615340	764	0	50	Tumor	GSE25066	Positive	Positive	Negative	m6Acluster A	NO	<=53	Alive	Gene.cluster A	-13.0835	High m6Ascore
GSM615341	811	0	47	Tumor	GSE25066	Positive	Positive	Negative	m6Acluster C	NO	<=53	Alive	Gene.cluster C	-15.8232	Low m6Ascore
GSM615342	715	0	43	Tumor	GSE25066	Negative	Negative	Negative	m6Acluster C	YES	<=53	Alive	Gene.cluster C	-9.505	High m6Ascore
GSM615343	673	0	30	Tumor	GSE25066	Positive	Positive	Negative	m6Acluster B	NO	<=53	Alive	Gene.cluster A	-12.5292	High m6Ascore
GSM615344	503	1	58	Tumor	GSE25066	Negative	Negative	Negative	m6Acluster C	YES	>53	Dead	Gene.cluster B	-10.1438	High m6Ascore
GSM615345	752	0	64	Tumor	GSE25066	Negative	Negative	Negative	m6Acluster A	YES	>53	Alive	Gene.cluster A	-15.4917	Low m6Ascore
GSM615346	477	0	42	Tumor	GSE25066	Negative	Negative	Negative	m6Acluster B	YES	<=53	Alive	Gene.cluster A	-12.6251	High m6Ascore
GSM615347	822	1	72	Tumor	GSE25066	Negative	Negative	Negative	m6Acluster B	YES	>53	Dead	Gene.cluster B	-8.82546	High m6Ascore
GSM615348	841	0	33	Tumor	GSE25066	Negative	Negative	Negative	m6Acluster A	YES	<=53	Alive	Gene.cluster B	-9.32667	High m6Ascore
GSM615349	852	0	50	Tumor	GSE25066	Positive	Positive	Negative	m6Acluster C	NO	<=53	Alive	Gene.cluster A	-14.7508	Low m6Ascore
GSM615350	833	0	59	Tumor	GSE25066	Negative	Positive	Negative	m6Acluster A	NO	>53	Alive	Gene.cluster A	-13.7325	Low m6Ascore
GSM615351	873	0	53	Tumor	GSE25066	Positive	Positive	Negative	m6Acluster B	NO	<=53	Alive	Gene.cluster C	-15.7951	Low m6Ascore
GSM615352	788	0	73	Tumor	GSE25066	Positive	Positive	Negative	m6Acluster B	NO	>53	Alive	Gene.cluster C	-14.6914	Low m6Ascore
GSM615353	610	0	46	Tumor	GSE25066	Positive	Positive	Negative	m6Acluster A	NO	<=53	Alive	Gene.cluster A	-10.5864	High m6Ascore
GSM615354	516	0	46	Tumor	GSE25066	Negative	Negative	Negative	m6Acluster B	YES	<=53	Alive	Gene.cluster B	-8.39246	High m6Ascore
GSM615355	734	0	47	Tumor	GSE25066	Positive	Positive	Negative	m6Acluster C	NO	<=53	Alive	Gene.cluster C	-16.2889	Low m6Ascore
GSM615356	424	0	43	Tumor	GSE25066	Negative	Negative	Negative	m6Acluster B	YES	<=53	Alive	Gene.cluster A	-12.9877	High m6Ascore
GSM615357	637	0	53	Tumor	GSE25066	Negative	Negative	Negative	m6Acluster B	YES	<=53	Alive	Gene.cluster B	-8.32202	High m6Ascore
GSM615358	393	0	69	Tumor	GSE25066	Positive	Negative	Negative	m6Acluster C	NO	>53	Alive	Gene.cluster A	-14.8906	Low m6Ascore
GSM615359	631	0	51	Tumor	GSE25066	Negative	Negative	Negative	m6Acluster B	YES	<=53	Alive	Gene.cluster B	-10.3673	High m6Ascore
GSM615360	722	0	53	Tumor	GSE25066	Positive	Positive	Negative	m6Acluster B	NO	<=53	Alive	Gene.cluster A	-16.4605	Low m6Ascore
GSM615361	691	0	64	Tumor	GSE25066	Positive	Negative	Negative	m6Acluster C	NO	>53	Alive	Gene.cluster C	-12.5036	High m6Ascore
GSM615362	716	0	52	Tumor	GSE25066	Positive	Positive	Negative	m6Acluster C	NO	<=53	Alive	Gene.cluster C	-18.3521	Low m6Ascore
GSM615363	589	0	36	Tumor	GSE25066	Negative	Negative	Negative	m6Acluster B	YES	<=53	Alive	Gene.cluster B	-11.6073	High m6Ascore
GSM615364	562	0	34	Tumor	GSE25066	Negative	Negative	Negative	m6Acluster C	YES	<=53	Alive	Gene.cluster B	-11.2684	High m6Ascore
GSM615365	703	0	63	Tumor	GSE25066	Positive	Positive	Negative	m6Acluster C	NO	>53	Alive	Gene.cluster C	-15.4124	Low m6Ascore
GSM615366	685	0	46	Tumor	GSE25066	Positive	Positive	Negative	m6Acluster C	NO	<=53	Alive	Gene.cluster A	-13.6092	Low m6Ascore
GSM615367	554	0	49	Tumor	GSE25066	Positive	Positive	Negative	m6Acluster B	NO	<=53	Alive	Gene.cluster A	-12.0866	High m6Ascore
GSM615368	266	1	28	Tumor	GSE25066	Negative	Negative	Negative	m6Acluster A	YES	<=53	Dead	Gene.cluster B	-8.09138	High m6Ascore
GSM615369	694	0	50	Tumor	GSE25066	Negative	Negative	Negative	m6Acluster B	YES	<=53	Alive	Gene.cluster B	-7.5741	High m6Ascore
GSM615370	488	0	36	Tumor	GSE25066	Positive	Positive	Negative	m6Acluster C	NO	<=53	Alive	Gene.cluster A	-15.755	Low m6Ascore
GSM615371	625	0	67	Tumor	GSE25066	Negative	Negative	Negative	m6Acluster B	YES	>53	Alive	Gene.cluster B	-8.55893	High m6Ascore
GSM615372	619	0	39	Tumor	GSE25066	Negative	Negative	Negative	m6Acluster B	YES	<=53	Alive	Gene.cluster B	-7.92546	High m6Ascore
GSM615373	376	0	44	Tumor	GSE25066	Positive	Negative	Negative	m6Acluster B	NO	<=53	Alive	Gene.cluster A	-15.099	Low m6Ascore
GSM615374	608	0	56	Tumor	GSE25066	Positive	Positive	Negative	m6Acluster C	NO	>53	Alive	Gene.cluster C	-14.5499	Low m6Ascore
GSM615375	453	0	75	Tumor	GSE25066	Negative	Positive	Negative	m6Acluster B	NO	>53	Alive	Gene.cluster B	-7.84433	High m6Ascore
GSM615376	414	1	51	Tumor	GSE25066	Negative	Negative	Negative	m6Acluster C	YES	<=53	Dead	Gene.cluster B	-7.28246	High m6Ascore
GSM615377	627	0	49	Tumor	GSE25066	Positive	Positive	Negative	m6Acluster C	NO	<=53	Alive	Gene.cluster A	-13.8925	Low m6Ascore
GSM615378	409	0	41	Tumor	GSE25066	Negative	Negative	Negative	m6Acluster B	YES	<=53	Alive	Gene.cluster B	-8.4139	High m6Ascore
GSM615379	418	0	62	Tumor	GSE25066	Negative	Negative	Negative	m6Acluster B	YES	>53	Alive	Gene.cluster B	-9.87234	High m6Ascore
GSM615380	62	1	40	Tumor	GSE25066	Negative	Negative	Negative	m6Acluster B	YES	<=53	Dead	Gene.cluster B	-8.73796	High m6Ascore
GSM615381	368	0	62	Tumor	GSE25066	Positive	Positive	Negative	m6Acluster A	NO	>53	Alive	Gene.cluster C	-13.5162	Low m6Ascore
GSM615382	417	0	59	Tumor	GSE25066	Negative	Negative	Negative	m6Acluster B	YES	>53	Alive	Gene.cluster B	-10.3242	High m6Ascore
GSM615383	454	0	51	Tumor	GSE25066	Positive	Positive	Negative	m6Acluster C	NO	<=53	Alive	Gene.cluster C	-21.1465	Low m6Ascore
GSM615384	469	0	57	Tumor	GSE25066	Negative	Negative	Negative	m6Acluster B	YES	>53	Alive	Gene.cluster B	-10.3527	High m6Ascore
GSM615385	412	0	37	Tumor	GSE25066	Negative	Negative	Negative	m6Acluster C	YES	<=53	Alive	Gene.cluster C	-11.5956	High m6Ascore
GSM615386	321	0	49	Tumor	GSE25066	Positive	Positive	Negative	m6Acluster B	NO	<=53	Alive	Gene.cluster C	-14.3009	Low m6Ascore
GSM615387	508	0	38	Tumor	GSE25066	Negative	Negative	Negative	m6Acluster B	YES	<=53	Alive	Gene.cluster B	-11.7456	High m6Ascore
GSM615388	284	0	40	Tumor	GSE25066	Positive	Positive	Negative	m6Acluster C	NO	<=53	Alive	Gene.cluster C	-13.1089	High m6Ascore
GSM615389	419	0	53	Tumor	GSE25066	Positive	Negative	Negative	m6Acluster A	NO	<=53	Alive	Gene.cluster A	-17.2936	Low m6Ascore
GSM615390	543	0	46	Tumor	GSE25066	Negative	Negative	Negative	m6Acluster C	YES	<=53	Alive	Gene.cluster B	-9.00713	High m6Ascore
GSM615391	434	0	58	Tumor	GSE25066	Positive	Positive	Negative	m6Acluster A	NO	>53	Alive	Gene.cluster A	-11.7815	High m6Ascore
GSM615392	31	1	65	Tumor	GSE25066	Negative	Negative	Negative	m6Acluster B	YES	>53	Dead	Gene.cluster B	-7.92487	High m6Ascore
GSM615393	462	0	43	Tumor	GSE25066	Negative	Negative	Negative	m6Acluster B	YES	<=53	Alive	Gene.cluster B	-8.69268	High m6Ascore
GSM615394	436	0	62	Tumor	GSE25066	Negative	Negative	Negative	m6Acluster A	YES	>53	Alive	Gene.cluster B	-9.06188	High m6Ascore
GSM615395	388	0	64	Tumor	GSE25066	Positive	Negative	Negative	m6Acluster A	NO	>53	Alive	Gene.cluster C	-15.56	Low m6Ascore
GSM615396	301	0	32	Tumor	GSE25066	Negative	Negative	Negative	m6Acluster B	YES	<=53	Alive	Gene.cluster B	-9.57588	High m6Ascore
GSM615397	340	0	57	Tumor	GSE25066	Negative	Negative	Negative	m6Acluster B	YES	>53	Alive	Gene.cluster B	-8.76134	High m6Ascore
GSM615398	70	1	49	Tumor	GSE25066	Positive	Positive	Negative	m6Acluster B	NO	<=53	Dead	Gene.cluster A	-14.0881	Low m6Ascore
GSM615399	384	0	51	Tumor	GSE25066	Positive	Positive	Negative	m6Acluster C	NO	<=53	Alive	Gene.cluster C	-13.0138	High m6Ascore
GSM615400	1002	0	73	Tumor	GSE25066	Positive	Negative	Negative	m6Acluster C	NO	>53	Alive	Gene.cluster C	-17.0995	Low m6Ascore
GSM615401	917	0	71	Tumor	GSE25066	Positive	Negative	Negative	m6Acluster B	NO	>53	Alive	Gene.cluster A	-10.3994	High m6Ascore
GSM615402	862	0	47	Tumor	GSE25066	Positive	Positive	Negative	m6Acluster C	NO	<=53	Alive	Gene.cluster A	-13.5426	Low m6Ascore
GSM615403	462	1	50	Tumor	GSE25066	Negative	Negative	Negative	m6Acluster C	YES	<=53	Dead	Gene.cluster B	-5.91344	High m6Ascore
GSM615404	802	0	65	Tumor	GSE25066	Positive	Positive	Negative	m6Acluster B	NO	>53	Alive	Gene.cluster A	-14.3253	Low m6Ascore
GSM615405	189	1	58	Tumor	GSE25066	Negative	Negative	Negative	m6Acluster C	YES	>53	Dead	Gene.cluster A	-10.062	High m6Ascore
GSM615631	1660	1	32	Tumor	GSE25066	Positive	Positive	Negative	m6Acluster B	NO	<=53	Dead	Gene.cluster C	-15.4197	Low m6Ascore
GSM615632	1878	0	42	Tumor	GSE25066	Negative	Positive	Positive	m6Acluster C	NO	<=53	Alive	Gene.cluster B	-10.653	High m6Ascore
GSM615633	1960	0	37	Tumor	GSE25066	Positive	Positive	Negative	m6Acluster C	NO	<=53	Alive	Gene.cluster A	-16.9734	Low m6Ascore
GSM615634	1845	0	47	Tumor	GSE25066	Positive	Positive	Negative	m6Acluster A	NO	<=53	Alive	Gene.cluster A	-16.0824	Low m6Ascore
GSM615635	1817	0	44	Tumor	GSE25066	Positive	Positive	Negative	m6Acluster B	NO	<=53	Alive	Gene.cluster A	-13.9122	Low m6Ascore
GSM615636	907	0	51	Tumor	GSE25066	Positive	Positive	Negative	m6Acluster C	NO	<=53	Alive	Gene.cluster C	-14.0252	Low m6Ascore
GSM615637	1805	0	34	Tumor	GSE25066	Negative	Negative	Negative	m6Acluster C	YES	<=53	Alive	Gene.cluster B	-9.78012	High m6Ascore
GSM615638	1275	1	58	Tumor	GSE25066	Positive	Negative	Negative	m6Acluster A	NO	>53	Dead	Gene.cluster B	-9.96966	High m6Ascore
GSM615639	527	1	43	Tumor	GSE25066	Negative	Negative	Negative	m6Acluster B	YES	<=53	Dead	Gene.cluster B	-8.36881	High m6Ascore
GSM615640	436	1	49	Tumor	GSE25066	Negative	Negative	Negative	m6Acluster B	YES	<=53	Dead	Gene.cluster B	-9.84281	High m6Ascore
GSM615641	1629	0	40	Tumor	GSE25066	Negative	Positive	Negative	m6Acluster B	NO	<=53	Alive	Gene.cluster B	-9.78389	High m6Ascore
GSM615642	1762	0	54	Tumor	GSE25066	Positive	Positive	Negative	m6Acluster B	NO	>53	Alive	Gene.cluster A	-16.6399	Low m6Ascore
GSM615643	1758	0	65	Tumor	GSE25066	Negative	Negative	Positive	m6Acluster C	NO	>53	Alive	Gene.cluster B	-14.5421	Low m6Ascore
GSM615644	1628	0	50	Tumor	GSE25066	Negative	Negative	Negative	m6Acluster B	YES	<=53	Alive	Gene.cluster B	-7.84884	High m6Ascore
GSM615645	1795	0	47	Tumor	GSE25066	Positive	Positive	Negative	m6Acluster B	NO	<=53	Alive	Gene.cluster A	-15.8205	Low m6Ascore
GSM615646	1711	0	52	Tumor	GSE25066	Positive	Positive	Negative	m6Acluster A	NO	<=53	Alive	Gene.cluster C	-14.0341	Low m6Ascore
GSM615647	1649	0	45	Tumor	GSE25066	unknown	unknown	unknown	m6Acluster C	unknown	<=53	Alive	Gene.cluster C	-20.7546	Low m6Ascore
GSM615648	1614	0	59	Tumor	GSE25066	Positive	Negative	Negative	m6Acluster C	NO	>53	Alive	Gene.cluster B	-10.8474	High m6Ascore
GSM615649	164	1	65	Tumor	GSE25066	Negative	Negative	Negative	m6Acluster A	YES	>53	Dead	Gene.cluster B	-9.67775	High m6Ascore
GSM615650	1741	0	60	Tumor	GSE25066	Negative	Negative	Negative	m6Acluster C	YES	>53	Alive	Gene.cluster C	-12.9358	High m6Ascore
GSM615651	289	1	61	Tumor	GSE25066	Negative	Negative	Negative	m6Acluster A	YES	>53	Dead	Gene.cluster B	-11.8754	High m6Ascore
GSM615652	1623	0	41	Tumor	GSE25066	Positive	Positive	Negative	m6Acluster A	NO	<=53	Alive	Gene.cluster A	-12.394	High m6Ascore
GSM615653	1655	0	56	Tumor	GSE25066	Positive	Positive	Negative	m6Acluster A	NO	>53	Alive	Gene.cluster A	-11.1812	High m6Ascore
GSM615654	1252	1	45	Tumor	GSE25066	Positive	Positive	Negative	m6Acluster A	NO	<=53	Dead	Gene.cluster A	-16.7953	Low m6Ascore
GSM615655	454	0	26	Tumor	GSE25066	Negative	Negative	unknown	m6Acluster B	unknown	<=53	Alive	Gene.cluster A	-15.946	Low m6Ascore
GSM615656	1309	0	49	Tumor	GSE25066	Positive	Negative	Negative	m6Acluster B	NO	<=53	Alive	Gene.cluster C	-13.9208	Low m6Ascore
GSM615657	155	1	44	Tumor	GSE25066	Negative	Negative	Negative	m6Acluster B	YES	<=53	Dead	Gene.cluster B	-11.2482	High m6Ascore
GSM615658	1637	0	50	Tumor	GSE25066	Negative	Negative	Negative	m6Acluster B	YES	<=53	Alive	Gene.cluster C	-13.7686	Low m6Ascore
GSM615659	1613	0	60	Tumor	GSE25066	Positive	Positive	Negative	m6Acluster C	NO	>53	Alive	Gene.cluster C	-16.4467	Low m6Ascore
GSM615660	1113	0	41	Tumor	GSE25066	Negative	Negative	Negative	m6Acluster B	YES	<=53	Alive	Gene.cluster B	-7.61756	High m6Ascore
GSM615661	1616	0	62	Tumor	GSE25066	Negative	Negative	Negative	m6Acluster B	YES	>53	Alive	Gene.cluster B	-9.13952	High m6Ascore
GSM615662	693	1	43	Tumor	GSE25066	Positive	Positive	Negative	m6Acluster B	NO	<=53	Dead	Gene.cluster A	-13.1046	High m6Ascore
GSM615663	1619	0	53	Tumor	GSE25066	Positive	Positive	Negative	m6Acluster C	NO	<=53	Alive	Gene.cluster A	-15.0507	Low m6Ascore
GSM615664	379	0	44	Tumor	GSE25066	Positive	Positive	Negative	m6Acluster B	NO	<=53	Alive	Gene.cluster C	-12.5468	High m6Ascore
GSM615665	1636	0	50	Tumor	GSE25066	Positive	Positive	Negative	m6Acluster B	NO	<=53	Alive	Gene.cluster A	-14.8815	Low m6Ascore
GSM615666	1667	0	67	Tumor	GSE25066	Negative	Negative	Negative	m6Acluster B	YES	>53	Alive	Gene.cluster B	-7.41336	High m6Ascore
GSM615667	811	0	56	Tumor	GSE25066	Negative	Negative	Negative	m6Acluster B	YES	>53	Alive	Gene.cluster B	-12.1042	High m6Ascore
GSM615668	551	1	40	Tumor	GSE25066	Negative	Negative	Negative	m6Acluster C	YES	<=53	Dead	Gene.cluster B	-10.4835	High m6Ascore
GSM615669	1631	0	47	Tumor	GSE25066	Positive	Negative	Negative	m6Acluster B	NO	<=53	Alive	Gene.cluster A	-13.3837	Low m6Ascore
GSM615670	1467	0	52	Tumor	GSE25066	Positive	Positive	Negative	m6Acluster A	NO	<=53	Alive	Gene.cluster A	-11.4335	High m6Ascore
GSM615671	1445	0	39	Tumor	GSE25066	Negative	Negative	Negative	m6Acluster C	YES	<=53	Alive	Gene.cluster B	-9.95141	High m6Ascore
GSM615672	1044	0	50	Tumor	GSE25066	Negative	Negative	Negative	m6Acluster B	YES	<=53	Alive	Gene.cluster B	-10.5758	High m6Ascore
GSM615673	50	1	34	Tumor	GSE25066	Positive	Positive	Negative	m6Acluster A	NO	<=53	Dead	Gene.cluster A	-13.4474	Low m6Ascore
GSM615674	171	1	33	Tumor	GSE25066	Negative	Negative	Negative	m6Acluster C	YES	<=53	Dead	Gene.cluster B	-9.12562	High m6Ascore
GSM615675	1495	0	45	Tumor	GSE25066	Positive	Positive	Negative	m6Acluster A	NO	<=53	Alive	Gene.cluster A	-14.4372	Low m6Ascore
GSM615676	1529	0	47	Tumor	GSE25066	Negative	Positive	Negative	m6Acluster B	NO	<=53	Alive	Gene.cluster B	-8.12978	High m6Ascore
GSM615677	1483	0	46	Tumor	GSE25066	Negative	Negative	Negative	m6Acluster A	YES	<=53	Alive	Gene.cluster B	-10.0877	High m6Ascore
GSM615678	1450	0	55	Tumor	GSE25066	Positive	Positive	Negative	m6Acluster B	NO	>53	Alive	Gene.cluster A	-11.8871	High m6Ascore
GSM615679	703	0	43	Tumor	GSE25066	Positive	Positive	Negative	m6Acluster A	NO	<=53	Alive	Gene.cluster A	-14.5454	Low m6Ascore
GSM615680	1436	0	48	Tumor	GSE25066	Negative	Negative	Negative	m6Acluster B	YES	<=53	Alive	Gene.cluster B	-8.94428	High m6Ascore
GSM615681	451	1	53	Tumor	GSE25066	Negative	Negative	Negative	m6Acluster B	YES	<=53	Dead	Gene.cluster B	-8.00446	High m6Ascore
GSM615682	1349	0	46	Tumor	GSE25066	Negative	Positive	Negative	m6Acluster B	NO	<=53	Alive	Gene.cluster A	-13.9496	Low m6Ascore
GSM615683	1456	0	58	Tumor	GSE25066	Positive	Positive	Negative	m6Acluster C	NO	>53	Alive	Gene.cluster C	-20.0497	Low m6Ascore
GSM615684	1504	0	61	Tumor	GSE25066	Negative	Positive	Negative	m6Acluster C	NO	>53	Alive	Gene.cluster C	-14.4313	Low m6Ascore
GSM615685	2686	0	62	Tumor	GSE25066	Positive	Positive	Negative	m6Acluster C	NO	>53	Alive	Gene.cluster A	-17.0157	Low m6Ascore
GSM615686	489	1	37	Tumor	GSE25066	Positive	Positive	Negative	m6Acluster C	NO	<=53	Dead	Gene.cluster C	-16.1445	Low m6Ascore
GSM615687	460	1	39	Tumor	GSE25066	Negative	Negative	Negative	m6Acluster C	YES	<=53	Dead	Gene.cluster B	-7.83708	High m6Ascore
GSM615688	2412	0	38	Tumor	GSE25066	Positive	Negative	Negative	m6Acluster C	NO	<=53	Alive	Gene.cluster A	-13.3876	Low m6Ascore
GSM615689	739	1	40	Tumor	GSE25066	Negative	Negative	Negative	m6Acluster A	YES	<=53	Dead	Gene.cluster B	-9.65971	High m6Ascore
GSM615690	2338	0	45	Tumor	GSE25066	Positive	Positive	Negative	m6Acluster C	NO	<=53	Alive	Gene.cluster A	-15.4007	Low m6Ascore
GSM615691	766	1	34	Tumor	GSE25066	Negative	Negative	Negative	m6Acluster C	YES	<=53	Dead	Gene.cluster B	-8.91954	High m6Ascore
GSM615692	1512	0	59	Tumor	GSE25066	Positive	Positive	Negative	m6Acluster A	NO	>53	Alive	Gene.cluster C	-15.0955	Low m6Ascore
GSM615693	1725	0	36	Tumor	GSE25066	Negative	Positive	Negative	m6Acluster C	NO	<=53	Alive	Gene.cluster A	-14.982	Low m6Ascore
GSM615694	1974	0	40	Tumor	GSE25066	Negative	Negative	Negative	m6Acluster C	YES	<=53	Alive	Gene.cluster B	-7.739	High m6Ascore
GSM615695	1963	0	72	Tumor	GSE25066	Positive	Positive	Negative	m6Acluster C	NO	>53	Alive	Gene.cluster B	-10.6371	High m6Ascore
GSM615696	1077	1	65	Tumor	GSE25066	Negative	Negative	Negative	m6Acluster B	YES	>53	Dead	Gene.cluster B	-7.65487	High m6Ascore
GSM615697	2217	0	52	Tumor	GSE25066	Positive	Positive	Negative	m6Acluster A	NO	<=53	Alive	Gene.cluster A	-18.5587	Low m6Ascore
GSM615698	2102	0	56	Tumor	GSE25066	Positive	Positive	Negative	m6Acluster C	NO	>53	Alive	Gene.cluster C	-17.1529	Low m6Ascore
GSM615699	2138	0	47	Tumor	GSE25066	Negative	Negative	Negative	m6Acluster A	YES	<=53	Alive	Gene.cluster B	-9.4036	High m6Ascore
GSM615700	2197	0	69	Tumor	GSE25066	Positive	Positive	Negative	m6Acluster C	NO	>53	Alive	Gene.cluster A	-20.6905	Low m6Ascore
GSM615701	1935	0	53	Tumor	GSE25066	Positive	Negative	Negative	m6Acluster C	NO	<=53	Alive	Gene.cluster B	-12.9651	High m6Ascore
GSM615702	2045	0	57	Tumor	GSE25066	Positive	Negative	Negative	m6Acluster A	NO	>53	Alive	Gene.cluster A	-8.44848	High m6Ascore
GSM615703	1874	0	58	Tumor	GSE25066	Positive	Negative	Negative	m6Acluster C	NO	>53	Alive	Gene.cluster C	-13.7068	Low m6Ascore
GSM615704	1995	0	58	Tumor	GSE25066	Positive	Positive	Negative	m6Acluster C	NO	>53	Alive	Gene.cluster C	-15.2816	Low m6Ascore
GSM615705	1931	0	40	Tumor	GSE25066	Positive	Positive	Negative	m6Acluster C	NO	<=53	Alive	Gene.cluster C	-15.2924	Low m6Ascore
GSM615706	1700	0	43	Tumor	GSE25066	Negative	Positive	Negative	m6Acluster C	NO	<=53	Alive	Gene.cluster B	-10.1974	High m6Ascore
GSM615707	1749	0	63	Tumor	GSE25066	Negative	Negative	Negative	m6Acluster C	YES	>53	Alive	Gene.cluster C	-11.9951	High m6Ascore
GSM615708	1810	0	64	Tumor	GSE25066	Positive	Negative	Negative	m6Acluster C	NO	>53	Alive	Gene.cluster A	-13.9035	Low m6Ascore
GSM615709	1753	0	27	Tumor	GSE25066	Positive	Negative	Negative	m6Acluster B	NO	<=53	Alive	Gene.cluster A	-14.1312	Low m6Ascore
GSM615710	1483	0	42	Tumor	GSE25066	Positive	Positive	Negative	m6Acluster C	NO	<=53	Alive	Gene.cluster C	-15.7783	Low m6Ascore
GSM615711	1516	0	34	Tumor	GSE25066	Positive	Positive	Negative	m6Acluster C	NO	<=53	Alive	Gene.cluster C	-21.2423	Low m6Ascore
GSM615712	452	1	57	Tumor	GSE25066	Negative	Negative	Negative	m6Acluster B	YES	>53	Dead	Gene.cluster B	-6.02341	High m6Ascore
GSM615713	1128	1	45	Tumor	GSE25066	Positive	Positive	Negative	m6Acluster C	NO	<=53	Dead	Gene.cluster A	-19.0887	Low m6Ascore
GSM615714	1039	0	54	Tumor	GSE25066	Negative	Negative	Negative	m6Acluster B	YES	>53	Alive	Gene.cluster B	-8.81775	High m6Ascore
GSM615715	1030	0	50	Tumor	GSE25066	Negative	Negative	Negative	m6Acluster B	YES	<=53	Alive	Gene.cluster B	-8.09815	High m6Ascore
GSM615716	908	0	33	Tumor	GSE25066	Negative	Negative	Negative	m6Acluster B	YES	<=53	Alive	Gene.cluster B	-8.48397	High m6Ascore
GSM615717	972	0	45	Tumor	GSE25066	Positive	Positive	Negative	m6Acluster A	NO	<=53	Alive	Gene.cluster C	-15.0766	Low m6Ascore
[truncated: 251 more rows]
