# Supplementary material for: Comprehensive Characterization of m6A Regulators-Mediated Methylation Modification Patterns and Tumor Microenvironment Signature in Breast Cancer
Source: Research Square preprint supplement (doi:10.21203/rs.3.rs-332570/v1), 2021-03-30
Supplement: Supplementary file 2 [file cf78962d41863f2de42280a4.xlsx]

## Sheet: S2
Additional file 4. 178 overlap differential genes
QTRT1
ACSL4
PRRG1
RAB26
FAM173A
TTK
TGFA
CCDC94
CD163
RARRES1
BUB1
RAD51AP1
KIF14
MAD2L1
RRAGD
ERCC6L
PIP
CRAT
CEP55
SLC16A1
KPNA2
MKI67
ASPM
RRM2
RACGAP1
MELK
KIF18A
CCNA2
GABRP
AZGP1
AURKA
QPCT
DLGAP5
E2F8
TPX2
CENPE
KIF4A
MMP7
RNASE4
TSPYL5
CENPA
CCL2
BUB1B
MCM10
NCAPG
TOP2A
HMGCS2
CDCA8
SLC7A5
CENPF
SCUBE2
STC2
CCNB2
SPP1
KIF20A
KLK6
KIF23
KIF2C
HJURP
FOXM1
KIF11
GGH
SLC6A14
NDC80
KIAA1324
STK32B
SKA1
PRC1
FMO5
EXO1
PGR
CCNO
FOLR1
PBK
CCNE2
CHI3L1
KIF15
DNAJC12
ABLIM3
NCAPH
APOBEC3B
RAI2
CDH3
DSCC1
DUSP4
GTSE1
HMMR
NUSAP1
GINS1
PLK1
KRT6B
ALOX15B
SLC34A2
FAM64A
LAMB2
KCND3
EPHX2
PROS1
TBC1D9
IGFBP4
CDK1
PTPRT
MYBL2
KCNE4
CDC20
CACNA2D2
LMNB1
LTBP3
CDC25A
BIRC5
NEK2
TRIP13
SOX11
MYBL1
TSPAN1
UBE2C
CP
FGF2
KIF18B
FABP7
CFD
CLSTN2
TMEM47
COX7A1
CBX2
EZH2
PTTG1
MME
DTL
PRKACB
ATAD2
CYP4B1
ASTN2
SRPX
SLC27A2
KIFC1
CDCA3
NMU
MYLK
RAD54L
CST3
EEF1A2
CDC6
PTGER3
ERBB4
CDC45
SEMA3G
DACH1
PPP1R3C
CITED1
GSTM1
PDZK1
GPRC5C
GJB1
MSLN
MAOA
EFEMP1
GRP
IL6ST
GLRB
TAT
LPL
GJA1
SLC39A6
PLAT
CTGF
CHRDL1
CPA3
NRTN
IL20RA
PLIN1
BEX1
APOD
CYBRD1
FOXI1
SLC7A2
FABP4
S100P
