# Supplementary material for: Comprehensive Characterization of m6A Regulators-Mediated Methylation Modification Patterns and Tumor Microenvironment Signature in Breast Cancer
Source: Research Square preprint supplement (doi:10.21203/rs.3.rs-332570/v1), 2021-03-30
Supplement: Supplementary file 3 [file d083bb6445b589703a01b266.xlsx]

## Sheet: S1
Additional file 1. Clustering and prognostic analysis of m6A gene in m6A clusters
gene	cluster	beta	HR (95% CI for HR)	Wald test	log-rank test P-value	factor
ALKBH5	regulator cluster A	0.063	1.1 (0.83–1.4)	0.26	0.61	Risk factor for OS
CBLL1	regulator cluster C	-0.092	0.91 (0.82–1)	2.9	0.087	Favorable factor for OS
ELAVL1	regulator cluster A	0.14	1.2 (0.93–1.4)	1.7	0.19	Risk factor for OS
FMR1	regulator cluster C	0.19	1.2 (1–1.4)	5.8	0.016	Risk factor for OS
FTO	regulator cluster B	-0.077	0.93 (0.83–1)	2	0.16	Favorable factor for OS
HNRNPA2B1	regulator cluster A	-0.15	0.86 (0.7–1.1)	2.1	0.15	Favorable factor for OS
HNRNPC	regulator cluster A	-0.37	0.69 (0.55–0.86)	11	0.00086	Favorable factor for OS
IGF2BP1	regulator cluster D	0.13	1.1 (0.9–1.5)	1.2	0.28	Risk factor for OS
KIAA1429	regulator cluster B	0.067	1.1 (0.91–1.3)	0.71	0.4	Risk factor for OS
LRPPRC	regulator cluster C	0.21	1.2 (1–1.4)	6.5	0.011	Risk factor for OS
METTL14	regulator cluster B	-0.2	0.82 (0.66–1)	3.4	0.064	Favorable factor for OS
METTL3	regulator cluster A	-0.18	0.83 (0.71–0.97)	5.2	0.022	Favorable factor for OS
RBM15	regulator cluster C	-0.12	0.89 (0.77–1)	3.1	0.078	Favorable factor for OS
RBM15B	regulator cluster A	0.2	1.2 (0.99–1.5)	3.6	0.058	Risk factor for OS
WTAP	regulator cluster A	0.11	1.1 (0.92–1.3)	1.2	0.26	Risk factor for OS
YTHDC1	regulator cluster B	-0.1	0.9 (0.75–1.1)	1.2	0.27	Favorable factor for OS
YTHDC2	regulator cluster B	-0.15	0.86 (0.76–0.98)	4.9	0.027	Favorable factor for OS
YTHDF1	regulator cluster C	0.13	1.1 (0.96–1.4)	2.2	0.14	Risk factor for OS
YTHDF2	regulator cluster A	-0.016	0.98 (0.81–1.2)	0.03	0.87	Favorable factor for OS
YTHDF3	regulator cluster C	0.22	1.2 (1.1–1.4)	11	0.0011	Risk factor for OS
ZC3H13	regulator cluster B	0.029	1 (0.89–1.2)	0.14	0.7	Risk factor for OS
